# Supplementary material
Source: MDPI journal article supplement (https://www.mdpi.com/2571-6255/7/4/148)
Supplement: s1 [file s1]

# **Short-interval, high-severity wildfire depletes diversity of both extant vegetation and soil seed banks in fire-tolerant eucalypt forests**

Sabine Kasel <sup>1</sup>, Thomas A Fairman <sup>2</sup>, Craig R Nitschke <sup>1</sup>

1. School of Agriculture, Food and Ecosystem Sciences, Faculty of Science, University of Melbourne, 500 Yarra Boulevard, Burnley, Victoria 3121, Australia
2. School of Agriculture, Food and Ecosystem Sciences, Faculty of Science, University of Melbourne, Parkville, Victoria 3010, Australia

Corresponding Author: Sabine Kasel [skasel@unimelb.edu.au](mailto:skasel@unimelb.edu.au)

**Table S1** Fire history for each site sampled as part of this study.

|                     |                                 | Wildfire History |      |      | Fire History—prior to 2003 |           | Time Since Last Wildfire (years) |
|---------------------|---------------------------------|------------------|------|------|----------------------------|-----------|----------------------------------|
| Site                | Wildfire Frequency (since 2003) | 2003             | 2007 | 2013 | Wildfire                   | Plan Burn |                                  |
| Shrubby Dry Forest  |                                 |                  |      |      |                            |           |                                  |
| GM38                | Unburned                        |                  |      |      | 1939                       | 1994      | 78.9                             |
| GM74                | Unburned                        |                  |      |      | Unburnt                    | 1990      | 150.0                            |
| GM75                | Unburned                        |                  |      |      | Unburnt                    |           | 150.0                            |
| GM77                | Unburned                        |                  |      |      | Unburnt                    | 1996      | 150.0                            |
| GM78                | Unburned                        |                  |      |      | Unburnt                    |           | 150.0                            |
| GM03                | Single 2013                     |                  |      | ✓    | Unburnt                    | 1988      | 4.8                              |
| GM04                | Single 2013                     |                  |      | ✓    | Unburnt                    | 1988      | 4.8                              |
| GM80                | Single 2013                     |                  |      | ✓    | Unburnt                    | 1995      | 4.8                              |
| GM83                | Single 2013                     |                  |      | ✓    | Unburnt                    | 1995      | 4.8                              |
| GM100               | Single 2013                     |                  |      | ✓    | Unburnt                    | 1995      | 4.8                              |
| GM18                | Single 2007                     |                  | ✓    |      | Unburnt                    | 1994      | 10.9                             |
| GM20                | Single 2007                     |                  | ✓    |      | Unburnt                    | 1994      | 10.9                             |
| GM86                | Single 2007                     |                  | ✓    |      | Unburnt                    |           | 10.9                             |
| GM102               | Single 2007                     |                  | ✓    |      | Unburnt                    | 1987      | 10.9                             |
| GM104               | Single 2007                     |                  | ✓    |      | Unburnt                    | 1993      | 10.9                             |
| GM05                | Double                          |                  | ✓    | ✓    | Unburnt                    | 1992      | 4.8                              |
| GM07                | Double                          |                  | ✓    | ✓    | Unburnt                    | 1992      | 4.8                              |
| GM11                | Double                          |                  | ✓    | ✓    | Unburnt                    | 1992      | 4.8                              |
| GM16                | Double                          |                  | ✓    | ✓    | 1939                       | 1992      | 4.8                              |
| GM25                | Double                          |                  | ✓    | ✓    | Unburnt                    | 1992      | 4.8                              |
| Sub-Alpine Woodland |                                 |                  |      |      |                            |           |                                  |
| EPC2                | Unburned                        |                  |      |      | 1939                       | None      | 79.0                             |
| EPC3                | Unburned                        |                  |      |      | 1939                       | None      | 79.0                             |
| EPC4                | Unburned                        |                  |      |      | 1939                       | None      | 79.0                             |
| EPC5                | Unburned                        |                  |      |      | 1939                       | None      | 79.0                             |
| EPS2                | Single                          | ✓                |      |      | 1939                       | None      | 14.9                             |
| EPS3                | Single                          | ✓                |      |      | 1939                       | None      | 14.9                             |
| EPS4                | Single                          | ✓                |      |      | 1939                       | None      | 14.9                             |
| EPS5                | Single                          | ✓                |      |      | 1939                       | None      | 14.9                             |
| EPD2                | Double                          | ✓                |      | ✓    | 1985                       | None      | 4.9                              |
| EPD3                | Double                          | ✓                | ✓    |      | 1939                       | None      | 10.9                             |
| EPD4                | Double                          | ✓                |      | ✓    | 1985                       | None      | 4.9                              |
| EPD5                | Double                          | ✓                |      | ✓    | 1939                       | None      | 4.8                              |
| EPT2                | Triple                          | ✓                | ✓    | ✓    | 1985                       | None      | 4.9                              |
| EPT3                | Triple                          | ✓                | ✓    | ✓    | 1985                       | None      | 4.9                              |
| EPT4                | Triple                          | ✓                | ✓    | ✓    | 1939                       | None      | 4.8                              |
| EPT5                | Triple                          | ✓                | ✓    | ✓    | 1939                       | None      | 4.8                              |

**Table S2** Description of plant traits and their defining attributes.

| Trait and Attributes          | Abbreviation | Description                                                                                                                                   |
|-------------------------------|--------------|-----------------------------------------------------------------------------------------------------------------------------------------------|
| Life form <sup>A</sup>        |              |                                                                                                                                               |
| Chamaephyte                   | C            | Persistent buds $\geq 1$ cm and $< 20\text{--}30$ cm above ground surface                                                                     |
| Geophyte                      | G            | Persistent buds buried to a depth of 2–3 cm                                                                                                   |
| Hemicryptophytes <sup>B</sup> | H            | Persistent buds are in the immediate vicinity of the soil surface only, maximum height 1 cm                                                   |
| Erect Rosette                 | HE           | <sup>A</sup> All leaves radical, leaves always erect                                                                                          |
| Flat or Versatile Rosette     | HF           | All leaves radical, leaves flat or erect depending on conditions                                                                              |
| Partial Rosette               | HP           | Radical and cauline leaves present, largest leaves on lower stem                                                                              |
| Proto-hemicryptophyte         | HPr          | All leaves cauline, largest leaves towards the middle of stem                                                                                 |
| Phanerophyte                  | P            | Persistent buds $> 20\text{--}30$ cm on stems above the ground, includes twiners, vines, and epiphytes                                        |
| Therophyte                    | T            | Annual (monocarpic) plants, includes some facultatively perennial plants (polycarpic) that were judged to be predominantly annual             |
| Dispersal mode <sup>C</sup>   |              |                                                                                                                                               |
| Anemochory                    | ane          | Wind-dispersed; pappus, coma, samara, or similar attachment                                                                                   |
| Barochory                     | bar          | Gravity-dispersed; no apparent seed dispersal mechanism                                                                                       |
| Endozoochory                  | end          | Ingestion by vertebrates (mainly mammals and birds); fleshy dispersal units (berries, drupes, or aggregate fruits)                            |
| Epizoochory                   | epi          | Dispersal by adhesion to the outside of animals—usually on the hair of mammals, via appendages including barbs, hooks, spines, burrs, or awns |
| Mobile                        | mob          | Long-distance wind dispersal of small seed; includes barochores with seed dimensions $< 0.5$ mm, and mass generally $< 0.1$ mg                |
| Myrmecochory                  | myr          | Ant-dispersed, elaiosome attached to seed to attract ants                                                                                     |
| Fire Response <sup>D</sup>    |              |                                                                                                                                               |
| Obligate resprouters          | R            | Plants that rely on resprouting to regenerate after fire                                                                                      |
| Obligate seeders              | S            | Plants that do not resprout and rely on seeding to regenerate after fire                                                                      |
| Facultative resprouters       | SR           | Plants that can resprout and germinate seeds after fire                                                                                       |
| Weak seeders                  | Sr           | Seeders that also have some capacity to resprout                                                                                              |
| Weak resprouters              | Rs           | Resprouters that have some capacity to regenerate from seed                                                                                   |

<sup>A</sup>[1], <sup>B</sup>Growth forms within hemicryptophytes follow [2], <sup>C</sup>[3], <sup>D</sup>[4]

**Table S3** Total seedling density (germinants m<sup>-2</sup>) per treatment (C, control; S, smoke only; LHS, low heat plus smoke; and HHS, high heat plus smoke) for all species in soils from Shrubby Dry Forest and Sub-Alpine Woodland. For each species, density calculations only included sites in which species had germinated. Significance of differences in soil treatment effects were determined via Kruskal–Wallis followed by Dunn’s pairwise comparisons where *P* ≤0.05. Significant treatment effects are indicated by different letters and are in bold (NS = not significant). For both the soil seed bank and corresponding extant vegetation, frequency (Freq) is the proportion of sites that included a species. Importance Values (IV) were calculated as the sum of frequency of occurrence and relative density with a possible maximum value of 200. Data on plant functional traits were sourced from existing publications [5,6] as well as the AusTraits database [4]. Nomenclature follows VicFlora (<https://vicflora.rbg.vic.gov.au/>).

|              |                                                | Shrubby Dry Forest                        |      |      |      |                 |      |        |      | Sub-Alpine Woodland |                                           |         |        |          |                 |        |      |      |                   |                        |                             |                            |
|--------------|------------------------------------------------|-------------------------------------------|------|------|------|-----------------|------|--------|------|---------------------|-------------------------------------------|---------|--------|----------|-----------------|--------|------|------|-------------------|------------------------|-----------------------------|----------------------------|
|              |                                                |                                           |      |      |      |                 |      |        |      | Extant Vegetation   |                                           |         |        |          |                 |        |      |      | Extant Vegetation |                        |                             |                            |
|              |                                                | Soil Seed Bank (density m <sup>-2</sup> ) |      |      |      | Soil Seed Bank  |      |        |      |                     | Soil Seed Bank (density m <sup>-2</sup> ) |         |        |          | Soil Seed Bank  |        |      |      |                   | Trait                  |                             |                            |
|              |                                                |                                           |      |      |      | Rel Density (%) |      |        |      | Freq (%)            |                                           |         |        |          | Rel Density (%) |        |      |      | Freq (%)          | Life form <sup>A</sup> | Dispersal mode <sup>B</sup> | Fire Response <sup>C</sup> |
| Family       | Species                                        | C                                         | S    | LHS  | HHS  | Freq (%)        |      | IV (%) |      | C                   | S                                         | LHS     | HHS    | Freq (%) |                 | IV (%) |      |      |                   |                        |                             |                            |
| FABACEAE     | <i>Acacia alpina</i>                           |                                           |      |      |      |                 |      |        |      | 0.0                 | 0.0                                       | 60.5    | 60.5   | 6.3      | 0.13            | 6.4    |      | 18.8 | P                 | myr                    | S                           |                            |
| FABACEAE     | <i>Acacia dealbata</i> subsp. <i>dealbata</i>  | 0.0                                       | 0.0  | 0.0  | 80.6 | 10.0            | 0.22 | 10.2   | 15.0 |                     |                                           |         |        |          |                 |        |      |      | P                 | myr                    | Sr                          |                            |
| FABACEAE     | <i>Acacia mearnsii</i>                         |                                           |      |      |      |                 |      |        | 15.0 |                     |                                           |         |        |          |                 |        |      |      | P                 | myr                    | Sr                          |                            |
| FABACEAE     | <i>Acacia mucronata</i> var. <i>longifolia</i> |                                           |      |      |      |                 |      |        | 5.0  |                     |                                           |         |        |          |                 |        |      |      | P                 | myr                    | Rs                          |                            |
| FABACEAE     | <i>Acacia obliquinervia</i>                    |                                           |      |      |      |                 |      |        |      |                     |                                           |         |        |          |                 |        |      | 18.8 | P                 | myr                    | S                           |                            |
| FABACEAE     | <i>Acacia paradoxa</i>                         | 0.0                                       | 0.0  | 30.2 | 0.0  | 5.0             | 0.06 | 5.1    | 10.0 |                     |                                           |         |        |          |                 |        |      |      | P                 | myr                    | S                           |                            |
| FABACEAE     | <i>Acacia pycnantha</i>                        | 0.0                                       | 0.0  | 30.2 | 0.0  | 5.0             | 0.03 | 5.0    | 75.0 |                     |                                           |         |        |          |                 |        |      |      | P                 | myr                    | S                           |                            |
| FABACEAE     | <i>Acacia terminalis</i>                       | 0.0                                       | 0.0  | 60.5 | 0.0  | 5.0             | 0.06 | 5.1    | 5.0  |                     |                                           |         |        |          |                 |        |      |      | P                 | myr                    | Sr                          |                            |
| FABACEAE     | <i>Acacia verniciflua</i> ss                   |                                           |      |      |      |                 |      |        | 5.0  |                     |                                           |         |        |          |                 |        |      |      | P                 | myr                    | S                           |                            |
| ROSACEAE     | <i>Acaena novaezelandiae</i>                   |                                           |      |      |      |                 |      |        |      |                     |                                           |         |        |          |                 |        |      | 62.5 | C                 | epi                    | SR                          |                            |
| POLYGONACEAE | <i>Acetocella vulgaris</i> *                   |                                           |      |      |      |                 |      |        |      | 43.0a               | 39.8a                                     | 130.5ab | 151.2b | 68.8     | 7.57            | 76.3   |      | 81.3 | HP                | bar                    | SR                          |                            |
| ORCHIDACEAE  | <i>Acianthus</i> spp.                          | 18.1                                      | 18.1 | 0.0  | 0.0  | 20.0            | 0.17 | 20.2   |      |                     |                                           |         |        |          |                 |        |      |      | G                 | mob                    | R                           |                            |
| ERICACEAE    | <i>Acotriche serrulata</i>                     |                                           |      |      |      |                 |      |        | 5.0  |                     |                                           |         |        |          |                 |        |      |      | P                 | end                    | R                           |                            |
| ERICACEAE    | <i>Acrothamnus hookeri</i>                     |                                           |      |      |      |                 |      |        |      |                     |                                           |         |        |          |                 |        |      | 18.8 | P                 | end                    | S                           |                            |
| ERICACEAE    | <i>Acrothamnus maccraei</i>                    |                                           |      |      |      |                 |      |        |      |                     |                                           |         |        |          |                 |        |      | 12.5 | P                 | end                    | S                           |                            |
| ERICACEAE    | <i>Acrothamnus montanus</i>                    |                                           |      |      |      |                 |      |        |      |                     |                                           |         |        |          |                 |        |      | 50.0 | P                 | end                    | SR                          |                            |
| PTERIDIACEAE | <i>Adiantum aethiopilum</i>                    |                                           |      |      |      |                 |      |        | 5.0  |                     |                                           |         |        |          |                 |        |      |      | HPr               | mob                    | R                           |                            |
| POACEAE      | <i>Agrostis capillaris</i> *                   |                                           |      |      |      |                 |      |        |      | 0.0                 | 0.0                                       | 30.2    | 0.0    | 6.3      | 0.03            | 6.3    |      |      | HE                | epi                    | SR                          |                            |
| POACEAE      | <i>Agrostis/Lachnagrostis</i> spp.             |                                           |      |      |      |                 |      |        | 15.0 |                     |                                           |         |        |          |                 |        |      |      | T                 | epi                    | SR                          |                            |
| POACEAE      | <i>Aira caryophyllea</i> *                     |                                           |      |      |      |                 |      |        |      |                     |                                           |         |        |          |                 |        |      | 6.3  | T                 | mob                    | S                           |                            |
| LAMIACEAE    | <i>Ajuga australis</i>                         |                                           |      |      |      |                 |      |        | 5.0  |                     |                                           |         |        |          |                 |        |      |      | HP                | myr                    | S                           |                            |
| POACEAE      | <i>Anthosachne rectiseta</i>                   |                                           |      |      |      |                 |      |        |      | 0.0                 | 15.1                                      | 0.0     | 15.1   | 12.5     | 0.07            | 12.6   |      |      | HE                | epi                    | R                           |                            |
| POACEAE      | <i>Anthoxanthum odoratum</i> *                 | 30.2                                      | 0.0  | 0.0  | 0.0  | 5.0             | 0.03 | 5.0    |      | 0.0                 | 30.2                                      | 0.0     | 0.0    | 12.5     | 0.10            | 12.6   | 18.8 |      | HE                | epi                    | Rs                          |                            |
| FABACEAE     | <i>Aotus ericoides</i>                         | 0.0                                       | 0.0  | 60.5 | 0.0  | 5.0             | 0.06 | 5.1    | 5.0  |                     |                                           |         |        |          |                 |        |      |      | P                 | myr                    | Rs                          |                            |
| ASPARAGACEAE | <i>Arthropodium milleflorum</i> s.l.           |                                           |      |      |      |                 |      |        |      |                     |                                           |         |        |          |                 |        |      | 43.8 | G                 | bar                    | R                           |                            |
| ASPARAGACEAE | <i>Arthropodium</i> spp.                       |                                           |      |      |      |                 |      |        | 5.0  |                     |                                           |         |        |          |                 |        |      |      | G                 | bar                    | R                           |                            |
| RUBIACEAE    | <i>Asperula conferta</i>                       |                                           |      |      |      |                 |      |        |      | 30.2                | 50.4                                      | 0.0     | 0.0    | 12.5     | 0.26            | 12.8   | 37.5 |      | C                 | bar                    | R                           |                            |
| RUBIACEAE    | <i>Asperula gunnii</i>                         |                                           |      |      |      |                 |      |        |      | 0.0                 | 20.2                                      | 0.0     | 10.1   | 18.8     | 0.10            | 18.8   | 12.5 |      | C                 | bar                    | R                           |                            |
| RUBIACEAE    | <i>Asperula polymera</i>                       |                                           |      |      |      |                 |      |        |      |                     |                                           |         |        |          |                 |        | 6.3  |      | C                 | bar                    |                             |                            |
| RUBIACEAE    | <i>Asperula pusilla</i>                        |                                           |      |      |      |                 |      |        |      | 30.2                | 0.0                                       | 0.0     | 0.0    | 6.3      | 0.03            | 6.3    | 12.5 |      | C                 | bar                    | R                           |                            |
| RUBIACEAE    | <i>Asperula scoparia</i>                       |                                           |      |      |      |                 |      |        | 5.0  | 0.0                 | 0.0                                       | 60.5    | 0.0    | 6.3      | 0.07            | 6.3    | 18.8 |      | C                 | end                    | Rs                          |                            |
| ERICACEAE    | <i>Astroloma humifusum</i>                     |                                           |      |      |      |                 |      |        | 20.0 |                     |                                           |         |        |          |                 |        |      |      | P                 | end                    | R                           |                            |

|                 |                                                    | Shrubby Dry Forest                        |        |       |          |                |                 |        |                   | Sub-Alpine Woodland                       |       |       |         |                |          |                 |                   |        |          |                        |                             |                            |
|-----------------|----------------------------------------------------|-------------------------------------------|--------|-------|----------|----------------|-----------------|--------|-------------------|-------------------------------------------|-------|-------|---------|----------------|----------|-----------------|-------------------|--------|----------|------------------------|-----------------------------|----------------------------|
| Family          | Species                                            | Soil Seed Bank (density m <sup>-2</sup> ) |        |       |          | Soil Seed Bank |                 |        | Extant Vegetation | Soil Seed Bank (density m <sup>-2</sup> ) |       |       |         | Soil Seed Bank |          |                 | Extant Vegetation | Trait  |          |                        |                             |                            |
|                 |                                                    | C                                         | S      | LHS   | HHS      | Freq (%)       | Rel Density (%) | IV (%) |                   | Freq (%)                                  | C     | S     | LHS     | HHS            | Freq (%) | Rel Density (%) |                   | IV (%) | Freq (%) | Life form <sup>A</sup> | Dispersal mode <sup>B</sup> | Fire Response <sup>C</sup> |
|                 |                                                    |                                           |        |       |          |                |                 |        |                   |                                           |       |       |         |                |          |                 |                   |        |          |                        |                             |                            |
| ARALIACEAE      | <i>Astrotricha parvifolia</i> subsp. 2             |                                           |        |       |          |                |                 |        | 10.0              |                                           |       |       |         |                |          |                 |                   | P      | bar      | S                      |                             |                            |
| POACEAE         | <i>Australopyrum velutinum</i>                     |                                           |        |       |          |                |                 |        |                   |                                           |       |       |         |                |          |                 | 6.3               | HE     | epi      | R                      |                             |                            |
| POACEAE         | <i>Austrostipa</i> spp.                            |                                           |        |       |          |                |                 |        | 5.0               |                                           |       |       |         |                |          |                 | 6.3               | HE     | epi      | R                      |                             |                            |
| PITTOSPORACEAE  | <i>Billardiera mutabilis</i>                       | 17.3                                      | 13.0   | 25.9  | 30.2 NS  | 35.0           | 0.55            | 35.6   | 65.0              |                                           |       |       |         |                |          |                 |                   | P      | end      | SR                     |                             |                            |
| BLECHNACEAE     | <i>Blechnum minus</i>                              |                                           |        |       |          |                |                 |        |                   | 0.0                                       | 0.0   | 30.2  | 0.0     | 6.3            | 0.03     | 6.3             |                   | HPr    | mob      | R                      |                             |                            |
| RUTACEAE        | <i>Boronia algida</i>                              |                                           |        |       |          |                |                 |        |                   |                                           |       |       |         |                |          |                 | 12.5              | P      | bar      | Sr                     |                             |                            |
| FABACEAE        | <i>Bossiaea bracteosa</i>                          |                                           |        |       |          |                |                 |        |                   |                                           |       |       |         |                |          |                 | 12.5              | P      | myr      |                        |                             |                            |
| FABACEAE        | <i>Bossiaea distichoclada</i>                      |                                           |        |       |          |                |                 |        |                   |                                           |       |       |         |                |          |                 | 6.3               | P      | myr      |                        |                             |                            |
| FABACEAE        | <i>Bossiaea foliosa</i>                            |                                           |        |       |          |                |                 |        |                   |                                           |       |       |         |                |          |                 | 12.5              | P      | myr      | SR                     |                             |                            |
| ERICACEAE       | <i>Brachyloma daphnoides</i>                       |                                           |        |       |          |                |                 |        | 15.0              |                                           |       |       |         |                |          |                 |                   | P      | myr      | Rs                     |                             |                            |
| ASTERACEAE      | <i>Brachyscome decipiens</i>                       |                                           |        |       |          |                |                 |        |                   | 0.0                                       | 0.0   | 15.1  | 15.1    | 12.5           | 0.07     | 12.6            | 31.3              | HF     | ane      | S                      |                             |                            |
| ASTERACEAE      | <i>Brachyscome spathulata</i>                      |                                           |        |       |          |                |                 |        |                   |                                           |       |       |         |                |          |                 | 18.8              | HP     | ane      | R                      |                             |                            |
| GOODENIACEAE    | <i>Brunonia australis</i>                          |                                           |        |       |          |                |                 |        |                   |                                           |       |       |         |                |          |                 | 6.3               | HE     | ane      | R                      |                             |                            |
| PITTOSPORACEAE  | <i>Bursaria spinosa</i> subsp. spinosa             |                                           |        |       |          |                |                 |        | 30.0              |                                           |       |       |         |                |          |                 |                   | P      | ane      | R                      |                             |                            |
| ASPHODELACEAE   | <i>Caesia calliantha</i>                           | 30.2                                      | 0.0    | 0.0   | 0.0      | 5.0            | 0.03            | 5.0    |                   |                                           |       |       |         |                |          |                 |                   | G      | myr      | Rs                     |                             |                            |
| ORCHIDACEAE     | <i>Caladenia alpina</i>                            |                                           |        |       |          |                |                 |        |                   |                                           |       |       |         |                |          |                 | 18.8              | G      | mob      | R                      |                             |                            |
| CULCITACEAE     | <i>Calochlaena dubia</i>                           | 30.2                                      | 0.0    | 0.0   | 0.0      | 5.0            | 0.03            | 5.0    |                   | 22.7                                      | 0.0   | 7.6   | 0.0     | 18.8           | 0.13     | 18.9            |                   | G      | mob      | R                      |                             |                            |
| BRASSICACEAE    | <i>Cardamine lilacina</i>                          |                                           |        |       |          |                |                 |        |                   |                                           |       |       |         |                |          |                 | 6.3               | HP     | bar      | S                      |                             |                            |
| BRASSICACEAE    | <i>Cardamine occulata</i> *                        |                                           |        |       |          |                |                 |        |                   | 0.0                                       | 0.0   | 0.0   | 30.2    | 6.3            |          | 6.3             |                   | T      | bar      | S                      |                             |                            |
| BRASSICACEAE    | <i>Cardamine papillata</i>                         |                                           |        |       |          |                |                 |        |                   |                                           |       |       |         |                |          |                 | 18.8              | HP     | bar      | S                      |                             |                            |
| CYPERACEAE      | <i>Carex breviculmis</i>                           | 10.1                                      | 10.1   | 20.2  | 10.1     | 10.0           | 0.14            | 10.1   | 5.0               | 135.5                                     | 133.3 | 106.4 | 71.7 NS | 93.8           | 13.19    | 106.9           | 75.0              | HE     | bar      | R                      |                             |                            |
| ASTERACEAE      | <i>Cassinia aculeata</i>                           | 30.2                                      | 24.2   | 12.1  | 39.3 NS  | 30.0           | 0.97            | 31.0   | 5.0               | 0.0                                       | 0.0   | 60.5  | 0.0     | 6.3            | 0.07     | 6.3             | 37.5              | P      | ane      | S                      |                             |                            |
| ASTERACEAE      | <i>Cassinia longifolia</i>                         | 53.8                                      | 68.9   | 77.3  | 72.2 NS  | 55.0           | 4.48            | 59.5   | 65.0              |                                           |       |       |         |                |          |                 |                   | P      | ane      | S                      |                             |                            |
| LAURACEAE       | <i>Cassytha melantha</i>                           |                                           |        |       |          |                |                 |        | 15.0              |                                           |       |       |         |                |          |                 |                   | EPI    | end      | S                      |                             |                            |
| ASTERACEAE      | <i>Celmisia</i> sp.                                |                                           |        |       |          |                |                 |        |                   |                                           |       |       |         |                |          |                 | 25.0              | HF     | ane      |                        |                             |                            |
| ASTERACEAE      | <i>Celmisia tomentella</i>                         |                                           |        |       |          |                |                 |        |                   |                                           |       |       |         |                |          |                 | 31.3              | HF     | ane      | SR                     |                             |                            |
| GENTIANACEAE    | <i>Centaurium erythraea</i> *                      | 133.0                                     | 217.7  | 181.4 | 211.7 NS | 15.0           | 3.40            | 18.4   |                   |                                           |       |       |         |                |          |                 |                   | T      | mob      | Sr                     |                             |                            |
| CARYOPHYLLACEAE | <i>Cerastium glomeratum</i> ss *                   |                                           |        |       |          |                |                 |        |                   |                                           |       |       |         |                |          |                 | 6.3               | T      | mob      | S                      |                             |                            |
| CARYOPHYLLACEAE | <i>Cerastium vulgare</i> *                         | 10.1a                                     | 20.2ab | 10.1a | 85.7b    | 20.0           | 0.69            | 20.7   |                   | 13.4                                      | 30.2  | 33.6  | 16.8 NS | 43.8           | 0.93     | 44.7            | 37.5              | HP     | bar      | S                      |                             |                            |
| PTERIDIACEAE    | <i>Chelianthes austrotenuifolia</i>                | 30.2                                      | 0.0    | 0.0   | 0.0      | 10.0           | 0.06            | 10.1   | 5.0               |                                           |       |       |         |                |          |                 |                   | HE     | mob      | R                      |                             |                            |
| ORCHIDACEAE     | <i>Chiloglottis</i> sp.                            |                                           |        |       |          |                |                 |        |                   |                                           |       |       |         |                |          |                 | 6.3               | G      | mob      | R                      |                             |                            |
| ASTERACEAE      | <i>Chrysocephalum apiculatum</i> subsp. apiculatum |                                           |        |       |          |                |                 |        |                   |                                           |       |       |         |                |          |                 | 18.8              | HP     | ane      | Rs                     |                             |                            |
| ASTERACEAE      | <i>Cirsium vulgare</i> *                           |                                           |        |       |          |                |                 |        |                   |                                           |       |       |         |                |          |                 | 12.5              | T      | ane      | Sr                     |                             |                            |
| RANUNCULACEAE   | <i>Clematis aristata</i>                           | 30.2                                      | 45.4   | 0.0   | 0.0      | 10.0           | 0.14            | 10.1   | 10.0              |                                           |       |       |         |                |          |                 |                   | P      | ane      | Rs                     |                             |                            |
| RANUNCULACEAE   | <i>Clematis glycinoides</i>                        |                                           |        |       |          |                |                 |        | 10.0              |                                           |       |       |         |                |          |                 |                   | P      | ane      | R                      |                             |                            |
| RUBIACEAE       | <i>Coprosma hirtella</i>                           |                                           |        |       |          |                |                 |        |                   |                                           |       |       |         |                |          |                 | 37.5              | P      | end      | R                      |                             |                            |
| RUBIACEAE       | <i>Coprosma nivalis</i>                            |                                           |        |       |          |                |                 |        |                   |                                           |       |       |         |                |          |                 | 6.3               | P      | end      | S                      |                             |                            |
| RUBIACEAE       | <i>Coprosma quadrifida</i>                         |                                           |        |       |          |                |                 |        | 10.0              |                                           |       |       |         |                |          |                 |                   | P      | end      | SR                     |                             |                            |

|                |                                                            | Shrubby Dry Forest                        |      |       |         |                |                 |        |                   | Sub-Alpine Woodland                       |       |        |         |                |          |                 |                   |        |          |                        |                             |                            |
|----------------|------------------------------------------------------------|-------------------------------------------|------|-------|---------|----------------|-----------------|--------|-------------------|-------------------------------------------|-------|--------|---------|----------------|----------|-----------------|-------------------|--------|----------|------------------------|-----------------------------|----------------------------|
| Family         | Species                                                    | Soil Seed Bank (density m <sup>-2</sup> ) |      |       |         | Soil Seed Bank |                 |        | Extant Vegetation | Soil Seed Bank (density m <sup>-2</sup> ) |       |        |         | Soil Seed Bank |          |                 | Extant Vegetation | Trait  |          |                        |                             |                            |
|                |                                                            | C                                         | S    | LHS   | HHS     | Freq (%)       | Rel Density (%) | IV (%) |                   | Freq (%)                                  | C     | S      | LHS     | HHS            | Freq (%) | Rel Density (%) |                   | IV (%) | Freq (%) | Life form <sup>A</sup> | Dispersal mode <sup>B</sup> | Fire Response <sup>C</sup> |
|                |                                                            |                                           |      |       |         |                |                 |        |                   |                                           |       |        |         |                |          |                 |                   |        |          |                        |                             |                            |
| ASTERACEAE     | <i>Coronidium monticola</i>                                |                                           |      |       |         |                |                 |        |                   | 45.4                                      | 30.2  | 30.2   | 0.0     | 6.3            | 0.23     | 6.5             | 50.0              | HP     | ane      | R                      |                             |                            |
| ASTERACEAE     | <i>Coronidium scorpioides</i>                              |                                           |      |       |         |                |                 |        | 5.0               |                                           |       |        |         |                |          |                 | 12.5              | HP     | ane      | Rs                     |                             |                            |
| RUTACEAE       | <i>Correa reflexa</i>                                      | 0.0                                       | 0.0  | 0.0   | 30.2    | 10.0           | 0.06            | 10.1   | 5.0               |                                           |       |        |         |                |          |                 |                   | P      | myr      | Rs                     |                             |                            |
| ASTERACEAE     | <i>Cotula alpina</i>                                       |                                           |      |       |         |                |                 |        |                   |                                           |       |        |         |                |          |                 | 12.5              | HF     | bar      | R                      |                             |                            |
| ASTERACEAE     | <i>Craspedia gracilis</i>                                  |                                           |      |       |         |                |                 |        |                   |                                           |       |        |         |                |          |                 | 6.3               | HP     | ane      | R                      |                             |                            |
| ASTERACEAE     | <i>Cymbonotus</i> sp.                                      |                                           |      |       |         |                |                 |        | 5.0               |                                           |       |        |         |                |          |                 |                   | HF     | bar      | R                      |                             |                            |
| POACEAE        | <i>Dactylis glomerata</i> *                                |                                           |      |       |         |                |                 |        |                   |                                           |       |        |         |                |          |                 | 6.3               | HF     | bar      |                        |                             |                            |
| FABACEAE       | <i>Daviesia buxifolia</i>                                  | 3.8a                                      | 1.9a | 56.7b | 54.8b   | 55.0           | 1.71            | 56.7   | 60.0              |                                           |       |        |         |                |          |                 |                   | P      | myr      | R                      |                             |                            |
| FABACEAE       | <i>Daviesia latifolia</i>                                  |                                           |      |       |         |                |                 |        | 5.0               |                                           |       |        |         |                |          |                 |                   | P      | myr      | Rs                     |                             |                            |
| FABACEAE       | <i>Daviesia ulicifolia</i> subsp. <i>ulicifolia</i>        |                                           |      |       |         |                |                 |        |                   | 30.2                                      | 0.0   | 30.2   | 30.2    | 6.3            | 0.10     | 6.3             | 18.8              | P      | myr      | Rs                     |                             |                            |
| FABACEAE       | <i>Desmodium gunnii</i>                                    |                                           |      |       |         |                |                 |        | 10.0              |                                           |       |        |         |                |          |                 |                   | HPr    | epi      | R                      |                             |                            |
| POACEAE        | <i>Deyeuxia quadriseta</i>                                 | 30.2b                                     | 0.0a | 33.6b | 26.9b   | 35.0           | 0.75            | 35.7   | 30.0              |                                           |       |        |         |                |          |                 |                   | HE     | epi      | R                      |                             |                            |
| POACEAE        | <i>Deyeuxia</i> sp.                                        |                                           |      |       |         |                |                 |        |                   | 10.1                                      | 0.0   | 20.2   | 10.1    | 12.5           | 0.13     | 12.6            |                   | HE     | epi      | R                      |                             |                            |
| LILIACEAE      | <i>Dianella revoluta</i> var. <i>revoluta</i>              |                                           |      |       |         |                |                 |        | 45.0              |                                           |       |        |         |                |          |                 |                   | HE     | end      | R                      |                             |                            |
| LILIACEAE      | <i>Dianella tasmanica</i>                                  |                                           |      |       |         |                |                 |        |                   | 0.0                                       | 0.0   | 60.5   | 0.0     | 6.3            | 0.07     | 6.3             | 25.0              | HE     | end      | R                      |                             |                            |
| CONVOLVULACEAE | <i>Dichondra repens</i>                                    | 20.2                                      | 0.0  | 342.7 | 121.0   | 10.0           | 1.33            | 11.3   | 20.0              | 10.1a                                     | 10.1a | 211.7b | 151.2ab | 12.5           | 1.26     | 13.8            | 12.5              | HF     | bar      | Sr                     |                             |                            |
| FABACEAE       | <i>Dillwynia cinerascens</i>                               | 0.0                                       | 0.0  | 0.0   | 30.2    | 5.0            | 0.03            | 5.0    |                   |                                           |       |        |         |                |          |                 |                   | P      | myr      | S                      |                             |                            |
| FABACEAE       | <i>Dillwynia juniperina</i>                                | 0.0                                       | 0.0  | 20.2  | 10.1    | 15.0           | 0.08            | 15.1   | 5.0               |                                           |       |        |         |                |          |                 |                   | P      | myr      | S                      |                             |                            |
| FABACEAE       | <i>Dillwynia sieberi</i>                                   | 30.2                                      | 0.0  | 0.0   | 0.0     | 5.0            | 0.03            | 5.0    |                   |                                           |       |        |         |                |          |                 |                   | P      | myr      | S                      |                             |                            |
| DROSERACEAE    | <i>Drosera auriculata</i>                                  | 0.0                                       | 10.1 | 30.2  | 20.2    | 10.0           | 0.17            | 10.2   |                   |                                           |       |        |         |                |          |                 |                   | G      | mob      | Rs                     |                             |                            |
| BORAGINACEAE   | <i>Echium plantagineum</i> *                               |                                           |      |       |         |                |                 |        |                   | 0.0                                       | 15.1  | 15.1   | 90.7    | 6.3            | 0.26     | 6.5             |                   | T      | end      | S                      |                             |                            |
| CHENOPODIACEAE | <i>Einadia hastata</i>                                     | 0.0                                       | 0.0  | 30.2  | 0.0     | 5.0            | 0.03            | 5.0    | 10.0              |                                           |       |        |         |                |          |                 |                   | C      | end      | S                      |                             |                            |
| POACEAE        | <i>Entolasia marginata</i>                                 | 6.0                                       | 18.1 | 18.1  | 6.0     | 20.0           | 0.22            | 20.2   |                   |                                           |       |        |         |                |          |                 |                   | HPr    | bar      | R                      |                             |                            |
| ERICACEAE      | <i>Epacris impressa</i> var. <i>impressa</i>               |                                           |      |       |         |                |                 |        | 10.0              |                                           |       |        |         |                |          |                 |                   | P      | mob      | SR                     |                             |                            |
| ONOGRACEAE     | <i>Epilobium billardiereanum</i> subsp. <i>cinereum</i>    |                                           |      |       |         |                |                 |        |                   | 30.2                                      | 0.0   | 0.0    | 0.0     | 12.5           | 0.07     | 12.6            | 12.5              | HPr    | ane      | R                      |                             |                            |
| ONAGRACEAE     | <i>Epilobium billardiereanum</i> subsp. <i>hydrophilum</i> |                                           |      |       |         |                |                 |        |                   | 22.7                                      | 0.0   | 7.6    | 22.7    | 25.0           | 0.23     | 25.2            |                   | HPr    | ane      | R                      |                             |                            |
| ONAGRACEAE     | <i>Epilobium curtisiae</i>                                 |                                           |      |       |         |                |                 |        |                   | 0.0                                       | 0.0   | 0.0    | 30.2    | 6.3            | 0.03     | 6.3             |                   | HPr    |          |                        |                             |                            |
| ONAGRACEAE     | <i>Epilobium gunnianum</i>                                 |                                           |      |       |         |                |                 |        |                   | 0.0                                       | 0.0   | 90.7   | 0.0     | 6.3            | 0.10     | 6.3             |                   | HPr    |          | Sr                     |                             |                            |
| ONAGRACEAE     | <i>Epilobium</i> sp.                                       |                                           |      |       |         |                |                 |        |                   |                                           |       |        |         |                |          |                 | 25.0              | HPr    | ane      |                        |                             |                            |
| ONAGRACEAE     | <i>Eplobium ciliatum</i> *                                 |                                           |      |       |         |                |                 |        |                   | 24.2                                      | 12.1  | 18.1   | 0.0     | 18.8           | 0.30     | 19.0            |                   | HP     | ane      |                        |                             |                            |
| ASTERACEAE     | <i>Erigeron bonariense</i> *                               | 7.6ab                                     | 3.8a | 30.2b | 3.8a    | 35.0           | 0.33            | 35.3   |                   | 0.0                                       | 0.0   | 30.2   | 0.0     | 12.5           | 0.07     | 12.6            |                   | T      | ane      | S                      |                             |                            |
| ASTERACEAE     | <i>Erigeron</i> sp.                                        | 4.3                                       | 28.8 | 17.3  | 14.4 NS | 65.0           | 1.24            | 66.2   | 10.0              | 10.1                                      | 0.0   | 5.0    | 15.1    | 31.3           | 0.20     | 31.4            |                   | T      | ane      | S                      |                             |                            |
| ASTERACEAE     | <i>Erigeron sumatrensis</i> *                              | 13.7                                      | 16.5 | 27.5  | 5.5 NS  | 35.0           | 0.64            | 35.6   |                   | 0.0                                       | 12.1  | 0.0    | 18.1    | 31.3           | 0.17     | 31.4            |                   | T      | ane      | S                      |                             |                            |
| PHRYMACEAE     | <i>Erythranthe moschata</i> *                              |                                           |      |       |         |                |                 |        |                   | 20.2                                      | 0.0   | 0.0    | 60.5    | 18.8           | 0.26     | 19.0            |                   | HPr    |          |                        |                             |                            |
| MYRTACEAE      | <i>Eucalyptus cypellocarpa</i>                             | 0.0                                       | 0.0  | 30.2  | 0.0     | 5.0            | 0.03            | 5.0    | 5.0               |                                           |       |        |         |                |          |                 |                   | P      | bar      | R                      |                             |                            |
| MYRTACEAE      | <i>Eucalyptus delegatensis</i>                             |                                           |      |       |         |                |                 |        |                   |                                           |       |        |         |                |          |                 | 6.3               | P      | bar      | S                      |                             |                            |
| MYRTACEAE      | <i>Eucalyptus globoidea</i>                                |                                           |      |       |         |                |                 |        | 10.0              |                                           |       |        |         |                |          |                 |                   | P      | bar      | R                      |                             |                            |

|                |                                                       | Shrubby Dry Forest                        |              |                |               |                |                 |        |                   | Sub-Alpine Woodland                       |      |      |         |                |          |                 |                   |       |                             |                            |
|----------------|-------------------------------------------------------|-------------------------------------------|--------------|----------------|---------------|----------------|-----------------|--------|-------------------|-------------------------------------------|------|------|---------|----------------|----------|-----------------|-------------------|-------|-----------------------------|----------------------------|
| Family         | Species                                               | Soil Seed Bank (density m <sup>-2</sup> ) |              |                |               | Soil Seed Bank |                 |        | Extant Vegetation | Soil Seed Bank (density m <sup>-2</sup> ) |      |      |         | Soil Seed Bank |          |                 | Extant Vegetation | Trait | Dispersal mode <sup>B</sup> | Fire Response <sup>C</sup> |
|                |                                                       | C                                         | S            | LHS            | HHS           | Freq (%)       | Rel Density (%) | IV (%) |                   | Freq (%)                                  | C    | S    | LHS     | HHS            | Freq (%) | Rel Density (%) |                   |       |                             |                            |
|                |                                                       |                                           |              |                |               |                |                 |        |                   |                                           |      |      |         |                |          |                 |                   |       |                             |                            |
| MYRTACEAE      | <i>Eucalyptus globulus</i>                            |                                           |              |                |               |                |                 |        | 20.0              |                                           |      |      |         |                |          |                 |                   | P     | bar                         | R                          |
| MYRTACEAE      | <i>Eucalyptus goniocalyx</i> subsp. <i>goniocalyx</i> |                                           |              |                |               |                |                 |        | 10.0              |                                           |      |      |         |                |          |                 |                   | P     | bar                         | R                          |
| MYRTACEAE      | <i>Eucalyptus macroryncha</i>                         | 30.2                                      | 0.0          | 0.0            | 0.0           | 10.0           | 0.06            | 10.1   | 40.0              |                                           |      |      |         |                |          |                 |                   | P     | bar                         | R                          |
| MYRTACEAE      | <i>Eucalyptus muelleriana</i>                         | 15.1                                      | 15.1         | 0.0            | 0.0           | 10.0           | 0.06            | 10.1   | 75.0              |                                           |      |      |         |                |          |                 |                   | P     | bar                         | R                          |
| MYRTACEAE      | <i>Eucalyptus pauciflora</i>                          |                                           |              |                |               |                |                 |        |                   |                                           |      |      |         |                |          |                 | 56.3              | P     | bar                         | R                          |
| MYRTACEAE      | <i>Eucalyptus pauciflora</i> subsp. <i>niphophila</i> |                                           |              |                |               |                |                 |        |                   |                                           |      |      |         |                |          |                 | 43.8              | P     | bar                         | R                          |
| MYRTACEAE      | <i>Eucalyptus pauciflora</i> subsp. <i>pauciflora</i> |                                           |              |                |               |                |                 |        |                   |                                           |      |      |         |                |          |                 | 6.3               | P     | bar                         | R                          |
| MYRTACEAE      | <i>Eucalyptus polyanthemos</i> subsp. <i>vestita</i>  |                                           |              |                |               |                |                 |        | 60.0              |                                           |      |      |         |                |          |                 |                   | P     | bar                         | R                          |
| MYRTACEAE      | <i>Eucalyptus sieberi</i>                             | 0.0                                       | 30.2         | 0.0            | 0.0           | 5.0            | 0.03            | 5.0    | 70.0              |                                           |      |      |         |                |          |                 |                   | P     | bar                         | R                          |
| MYRTACEAE      | <i>Eucalyptus tricarpa</i>                            |                                           |              |                |               |                |                 |        | 30.0              |                                           |      |      |         |                |          |                 |                   | P     | bar                         | R                          |
| ASTERACEAE     | <i>Euchiton involucratus</i>                          | 0.0                                       | 0.0          | 15.1           | 37.8          | 15.0           | 0.19            | 15.2   |                   | 10.1                                      | 0.0  | 20.2 | 10.1    | 18.8           | 0.13     | 18.9            |                   | HPr   | ane                         | S                          |
| ASTERACEAE     | <i>Euchiton japonicus</i>                             | 20.2                                      | 20.2         | 10.1           | 20.2 NS       | 20.0           | 0.39            | 20.4   |                   | 24.2                                      | 18.1 | 18.1 | 18.1 NS | 25.0           | 0.43     | 25.4            |                   | HP    | ane                         | Sr                         |
| OROBANCHACEAE  | <i>Euphrasia collina</i> subsp. <i>collina</i>        |                                           |              |                |               |                |                 |        |                   |                                           |      |      |         |                |          |                 | 6.3               | C     |                             | S                          |
| SANTALACEAE    | <i>Exocarpos cuppressiformis</i>                      |                                           |              |                |               |                |                 |        | 5.0               |                                           |      |      |         |                |          |                 |                   | P     | end                         | Rs                         |
| SANTALACEAE    | <i>Exocarpos</i> sp.                                  |                                           |              |                |               |                |                 |        | 10.0              |                                           |      |      |         |                |          |                 |                   | P     |                             |                            |
| SANTALACEAE    | <i>Exocarpos strictus</i>                             |                                           |              |                |               |                |                 |        | 5.0               |                                           |      |      |         |                |          |                 |                   | P     | end                         | R                          |
| CYPERACEAE     | <i>Gahnia microstachya</i>                            | 0.0                                       | 0.0          | 0.0            | 30.2          | 5.0            | 0.03            | 5.0    | 35.0              |                                           |      |      |         |                |          |                 |                   | HE    | bar                         | R                          |
| RUBIACEAE      | <i>Galium binifolium</i> subsp. <i>conforme</i>       | 51.8                                      | 75.6         | 62.6           | 75.6 NS       | 40.0           | 3.40            | 43.4   |                   | 0.0                                       | 0.0  | 60.5 | 0.0     | 6.3            | 0.13     | 6.4             |                   | C     | bar                         | S                          |
| RUBIACEAE      | <i>Galium leiocarpum</i>                              | 0.0                                       | 0.0          | 0.0            | 151.2         | 5.0            | 0.14            | 5.1    | 10.0              |                                           |      |      |         |                |          |                 |                   | C     | bar                         | S                          |
| RUBIACEAE      | <i>Galium</i> sp.                                     | 15.1                                      | 7.6          | 15.1           | 7.6           | 20.0           | 0.17            | 20.2   | 10.0              | 0.0                                       | 0.0  | 0.0  | 60.5    | 6.3            | 0.07     | 6.3             | 12.5              | C     | bar                         | S                          |
| ASTERACEAE     | <i>Gamochaeta americana purpurea</i> *                | 13.4                                      | 6.7          | 20.2           | 3.4 NS        | 40.0           | 0.36            | 40.4   |                   |                                           |      |      |         |                |          |                 |                   | T     | ane                         | S                          |
| ASTERACEAE     | <i>Gamochaeta calviceps</i> *                         | 26.5                                      | 22.7         | 3.8            | 7.6 NS        | 35.0           | 0.44            | 35.4   |                   |                                           |      |      |         |                |          |                 |                   | T     | ane                         | S                          |
| ASTERACEAE     | <i>Gamochaeta purpurea</i> *                          | 0.0                                       | 0.0          | 15.1           | 15.1          | 10.0           | 0.06            | 10.1   |                   |                                           |      |      |         |                |          |                 |                   | T     | ane                         | S                          |
| ERICACEAE      | <i>Gaultheria appressa</i>                            | 0.0                                       | 0.0          | 0.0            | 30.2          | 5.0            | 0.03            | 5.0    |                   | 15.1                                      | 0.0  | 30.2 | 0.0     | 12.5           | 0.10     | 12.6            |                   | P     | mob                         | S                          |
| GERANIACEAE    | <i>Geranium homeanum</i>                              | 60.5                                      | 40.3         | 121.0          | 161.3 NS      | 10.0           | 1.05            | 11.1   | 5.0               | 15.1                                      | 30.2 | 24.2 | 6.0 NS  | 50.0           | 0.83     | 50.8            |                   | HPr   | bar                         | SR                         |
| GERANIACEAE    | <i>Geranium potentilloides</i>                        |                                           |              |                |               |                |                 |        |                   | 30.2                                      | 0.0  | 0.0  | 0.0     | 6.3            | 0.03     | 6.3             |                   | HPr   | bar                         | SR                         |
| GERANIACEAE    | <i>Geranium potentilloides</i> var. <i>1</i>          |                                           |              |                |               |                |                 |        |                   | 90.7                                      | 0.0  | 30.2 | 0.0     | 6.3            | 0.13     | 6.4             | 18.8              | HPr   | bar                         | SR                         |
| GERANIACEAE    | <i>Geranium</i> sp.                                   | 0.0                                       | 0.0          | 30.2           | 0.0           | 10.0           | 0.08            | 10.1   | 10.0              | 21.6                                      | 38.9 | 21.6 | 17.3 NS | 37.5           | 0.76     | 38.3            | 31.3              | HPr   | bar                         | SR                         |
| GLEICHENIACEAE | <i>Gleichenia microphylla</i>                         | 0.0                                       | 15.1         | 0.0            | 30.2          | 10.0           | 0.08            | 10.1   |                   | 30.2                                      | 0.0  | 0.0  | 0.0     | 6.3            | 0.03     | 6.3             |                   | HPr   | mob                         | R                          |
| FABACEAE       | <i>Glycine clandestina</i>                            | <b>60.5a</b>                              | <b>22.7a</b> | <b>249.5ab</b> | <b>468.7b</b> | 10.0           | 2.93            | 12.9   | 5.0               |                                           |      |      |         |                |          |                 | 6.3               | C     | bar                         | Rs                         |
| HALORAGACEAE   | <i>Gonocarpus montanus</i>                            |                                           |              |                |               |                |                 |        |                   | 49.1                                      | 49.1 | 58.6 | 52.9 NS | 62.5           | 3.67     | 66.2            | 62.5              | HPr   | bar                         | S                          |
| GOODENIACEAE   | <i>Goodenia hederacea</i> subsp. <i>alpestris</i>     |                                           |              |                |               |                |                 |        |                   |                                           |      |      |         |                |          |                 | 50.0              | C     | myr                         | R                          |
| GOODENIACEAE   | <i>Goodenia ovata</i>                                 | <b>20.2b</b>                              | <b>13.4a</b> | <b>90.7b</b>   | <b>90.7b</b>  | 30.0           | 1.77            | 31.8   | 20.0              |                                           |      |      |         |                |          |                 |                   | P     | myr                         | Sr                         |
| PROTEACEAE     | <i>Grevillea australis</i>                            |                                           |              |                |               |                |                 |        |                   |                                           |      |      |         |                |          |                 | 6.3               | P     | myr                         | Sr                         |

|                  |                                                        | Shrubby Dry Forest                        |       |      |          |                |                 |        |          | Sub-Alpine Woodland |                                           |       |         |          |                 |                 |          |                        |                             |                            |                             |                            |
|------------------|--------------------------------------------------------|-------------------------------------------|-------|------|----------|----------------|-----------------|--------|----------|---------------------|-------------------------------------------|-------|---------|----------|-----------------|-----------------|----------|------------------------|-----------------------------|----------------------------|-----------------------------|----------------------------|
|                  |                                                        | Soil Seed Bank (density m <sup>-2</sup> ) |       |      |          | Soil Seed Bank |                 |        |          | Extant Vegetation   | Soil Seed Bank (density m <sup>-2</sup> ) |       |         |          | Soil Seed Bank  |                 |          |                        | Extant Vegetation           | Trait                      |                             |                            |
|                  |                                                        | C                                         | S     | LHS  | HHS      | Freq (%)       | Rel Density (%) | IV (%) | Freq (%) |                     | C                                         | S     | LHS     | HHS      | Freq (%)        | Rel Density (%) | IV (%)   | Freq (%)               |                             | Life form <sup>A</sup>     | Dispersal mode <sup>B</sup> | Fire Response <sup>C</sup> |
| Family           | Species                                                | C                                         | S     | LHS  | HHS      | Freq (%)       | Rel Density (%) | IV (%) | Freq (%) | C                   | S                                         | LHS   | HHS     | Freq (%) | Rel Density (%) | IV (%)          | Freq (%) | Life form <sup>A</sup> | Dispersal mode <sup>B</sup> | Fire Response <sup>C</sup> |                             |                            |
| PROTEACEAE       | <i>Grevillea chrysophaea</i>                           |                                           |       |      |          |                |                 |        | 10.0     |                     |                                           |       |         |          |                 |                 |          | P                      | myr                         | S                          |                             |                            |
| PROTEACEAE       | <i>Grevillea victoriae</i> subsp. <i>victoriae</i>     |                                           |       |      |          |                |                 |        |          |                     |                                           |       |         |          |                 |                 | 6.3      | P                      | myr                         |                            |                             |                            |
| FABACEAE         | <i>Hardenbergia violacea</i>                           | 0.0                                       | 0.0   | 30.2 | 0.0      | 5.0            | 0.03            | 5.0    | 5.0      |                     |                                           |       |         |          |                 |                 |          | P                      | myr                         | Rs                         |                             |                            |
| ASTERACEAE       | <i>Helichrysum leucopsideum</i>                        | 0.0                                       | 0.0   | 0.0  | 70.6     | 10.0           | 0.19            | 10.2   | 15.0     |                     |                                           |       |         |          |                 |                 |          | HPr                    | ane                         | SR                         |                             |                            |
| DILLENiaceAE     | <i>Hibbertia obtusifolia</i>                           | 15.1                                      | 0.0   | 0.0  | 15.1     | 10.0           | 0.06            | 10.1   | 60.0     |                     |                                           |       |         |          |                 |                 |          | P                      | myr                         | SR                         |                             |                            |
| POACEAE          | <i>Holcus lanatus</i> *                                |                                           |       |      |          |                |                 |        |          | 30.2                | 0.0                                       | 0.0   | 0.0     | 6.3      | 0.03            | 6.3             | 6.3      | HE                     | epi                         | R                          |                             |                            |
| FABACEAE         | <i>Hovea heterophylla</i>                              |                                           |       |      |          |                |                 |        | 10.0     |                     |                                           |       |         |          |                 |                 |          | C                      | myr                         | R                          |                             |                            |
| FABACEAE         | <i>Hovea montana</i>                                   |                                           |       |      |          |                |                 |        |          |                     |                                           |       |         |          |                 |                 | 18.8     | C                      | myr                         | R                          |                             |                            |
| APIACEAE         | <i>Hydrocotyle laxiflora</i>                           | 30.2                                      | 60.5  | 30.2 | 45.4     | 10.0           | 0.30            | 10.3   | 20.0     | 90.7                | 0.0                                       | 0.0   | 0.0     | 6.3      | 0.10            | 6.3             | 6.3      | HE                     | bar                         | Rs                         |                             |                            |
| APIACEAE         | <i>Hydrocotyle sibthorpioides</i>                      |                                           |       |      |          |                |                 |        |          | 302.4               | 514.0                                     | 680.4 | 362.9   | 12.5     | 4.07            | 16.6            | 6.3      | HE                     | bar                         | Sr                         |                             |                            |
| CLUSIACEAE       | <i>Hypericum gramineum</i>                             | 33.6                                      | 26.9  | 26.9 | 60.5 NS  | 30.0           | 1.22            | 31.2   | 10.0     | 786.2               | 0.0                                       | 0.0   | 0.0     | 6.3      | 0.86            | 7.1             |          | HPr                    | mob                         | Rs                         |                             |                            |
| HYPERICACEAE     | <i>Hypericum perfoliatum</i> subsp. <i>veronense</i> * |                                           |       |      |          |                |                 |        |          | 90.7                | 136.1                                     | 196.5 | 15.1    | 6.3      | 0.96            | 7.2             | 12.5     | HPr                    | bar                         | R                          |                             |                            |
| ASTERACEAE       | <i>Hypochaeris radicata</i> *                          | 15.1                                      | 15.1  | 0.0  | 0.0      | 10.0           | 0.06            | 10.1   |          | 39.7                | 39.7                                      | 54.8  | 43.5 NS | 62.5     | 3.11            | 65.6            | 81.3     | HF                     | ane                         | Rs                         |                             |                            |
| DENNSTAEDTIACEAE | <i>Hypolepis glandulifera</i>                          |                                           |       |      |          |                |                 |        |          | 15.1                | 0.0                                       | 15.1  | 0.0     | 12.5     | 0.07            | 12.6            |          | HPr                    | mob                         | R                          |                             |                            |
| FABACEAE         | <i>Indigofera australis</i>                            |                                           |       |      |          |                |                 |        | 5.0      |                     |                                           |       |         |          |                 |                 |          | P                      | bar                         | Rs                         |                             |                            |
| JUNCACEAE        | <i>Juncus planifolius</i>                              | 30.2                                      | 0.0   | 0.0  | 0.0      | 5.0            |                 | 5.0    |          |                     |                                           |       |         |          |                 |                 |          | HE                     | mob                         | R                          |                             |                            |
| JUNCACEAE        | <i>Juncus sp</i>                                       | 0.0                                       | 0.0   | 0.0  | 30.2     | 5.0            | 0.08            | 5.1    |          | 0.0                 | 30.2                                      | 0.0   | 0.0     | 6.3      | 0.17            | 6.4             |          | HE                     | mob                         | R                          |                             |                            |
| JUNCACEAE        | <i>Juncus pallidus</i>                                 |                                           |       |      |          |                |                 |        |          | 0.0                 | 30.2                                      | 0.0   | 0.0     | 6.3      |                 | 6.3             |          | HE                     | mob                         |                            |                             |                            |
| JUNCACEAE        | <i>Juncus sarophorus</i>                               | 30.2                                      | 0.0   | 0.0  | 0.0      | 5.0            |                 | 5.0    |          |                     |                                           |       |         |          |                 |                 |          | HE                     | mob                         |                            |                             |                            |
| JUNCACEAE        | <i>Juncus semisolidus</i>                              |                                           |       |      |          |                |                 |        |          | 30.2                | 0.0                                       | 0.0   | 0.0     | 6.3      |                 | 6.3             |          | HE                     | mob                         |                            |                             |                            |
| JUNCACEAE        | <i>Juncus alexandri/effusus</i>                        |                                           |       |      |          |                |                 |        |          | 30.2                | 0.0                                       | 0.0   | 0.0     | 12.5     |                 | 12.5            |          | HE                     | mob                         |                            |                             |                            |
| MYRTACEAE        | <i>Kunzea</i> spp. ( <i>upright form</i> )             | 24.2                                      | 24.2  | 12.1 | 6.0      | 20.0           | 0.30            | 20.3   | 15.0     |                     |                                           |       |         |          |                 |                 |          | P                      | mob                         | R                          |                             |                            |
| ASTERACEAE       | <i>Lagenophora huegelli</i>                            |                                           |       |      |          |                |                 |        | 5.0      |                     |                                           |       |         |          |                 |                 |          | HF                     | bar                         | R                          |                             |                            |
| ASTERACEAE       | <i>Lagenophora stipitata</i>                           |                                           |       |      |          |                |                 |        | 35.0     |                     |                                           |       |         |          |                 |                 | 25.0     | HF                     | bar                         | Rs                         |                             |                            |
| ASTERACEAE       | <i>Laphangium luteoalbum</i>                           | 49.9                                      | 256.6 | 93.2 | 192.1 NS | 100.0          | 20.02           | 120.0  |          | 8.6                 | 19.4                                      | 19.4  | 6.5 NS  | 56.3     | 0.83            | 57.1            |          | T                      | ane                         | S                          |                             |                            |
| ASTERACEAE       | <i>Leontodon rhagadioloides</i> *                      |                                           |       |      |          |                |                 |        |          | 0.0                 | 30.2                                      | 15.1  | 0.0     | 12.5     | 0.10            | 12.6            |          | T                      | ane                         | S                          |                             |                            |
| CYPERACEAE       | <i>Lepidosperma gunnii</i>                             |                                           |       |      |          |                |                 |        | 25.0     |                     |                                           |       |         |          |                 |                 |          | HE                     |                             | R                          |                             |                            |
| CYPERACEAE       | <i>Lepidosperma gunnii/laterale</i>                    | 0.0                                       | 0.0   | 15.1 | 15.1     | 10.0           | 0.06            | 10.1   |          | 0.0                 | 30.2                                      | 0.0   | 0.0     | 6.3      | 0.03            | 6.3             |          | HE                     |                             | R                          |                             |                            |
| CYPERACEAE       | <i>Lepidosperma laterale</i> var. <i>laterale</i>      |                                           |       |      |          |                |                 |        | 15.0     |                     |                                           |       |         |          |                 |                 |          | HE                     | myr                         | R                          |                             |                            |
| ASTERACEAE       | <i>Leptinella filicula</i>                             |                                           |       |      |          |                |                 |        |          | 55.0                | 52.2                                      | 63.2  | 30.2 NS | 43.8     | 2.41            | 46.2            | 31.3     | HF                     | bar                         | R                          |                             |                            |
| ERICACEAE        | <i>Leucopogon affinis</i>                              |                                           |       |      |          |                |                 |        |          |                     |                                           |       |         |          |                 |                 | 12.5     | P                      | end                         | R                          |                             |                            |
| LINACEAE         | <i>Linum marginale</i>                                 |                                           |       |      |          |                |                 |        |          |                     |                                           |       |         |          |                 |                 | 6.3      | HPr                    | bar                         | R                          |                             |                            |
| CAMPANULACEAE    | <i>Lobelia anceps</i>                                  |                                           |       |      |          |                |                 |        |          | 0.0                 | 0.0                                       | 0.0   | 30.2    | 6.3      | 0.07            | 6.3             |          | HPr                    | mob                         | SR                         |                             |                            |
| XANTHORRHOEACEAE | <i>Lomandra filiformis</i> subsp. <i>coriacea</i>      |                                           |       |      |          |                |                 |        | 5.0      |                     |                                           |       |         |          |                 |                 |          | HE                     | myr                         | R                          |                             |                            |
| XANTHORRHOEACEAE | <i>Lomandra filiformis</i> subsp. <i>filiformis</i>    | 0.0                                       | 30.2  | 0.0  | 0.0      | 5.0            | 0.03            | 5.0    | 65.0     |                     |                                           |       |         |          |                 |                 |          | HE                     | myr                         | R                          |                             |                            |
| XANTHORRHOEACEAE | <i>Lomandra longifolia</i> subsp. <i>exilis</i>        |                                           |       |      |          |                |                 |        | 15.0     |                     |                                           |       |         |          |                 |                 |          | HE                     | myr                         | R                          |                             |                            |



|                  |                                                       | Shrubby Dry Forest                        |             |               |               |                |                 |        |                   | Sub-Alpine Woodland                       |       |       |          |                |          |                 |                   |        |          |                        |                             |                            |
|------------------|-------------------------------------------------------|-------------------------------------------|-------------|---------------|---------------|----------------|-----------------|--------|-------------------|-------------------------------------------|-------|-------|----------|----------------|----------|-----------------|-------------------|--------|----------|------------------------|-----------------------------|----------------------------|
| Family           | Species                                               | Soil Seed Bank (density m <sup>-2</sup> ) |             |               |               | Soil Seed Bank |                 |        | Extant Vegetation | Soil Seed Bank (density m <sup>-2</sup> ) |       |       |          | Soil Seed Bank |          |                 | Extant Vegetation | Trait  |          |                        |                             |                            |
|                  |                                                       | C                                         | S           | LHS           | HHS           | Freq (%)       | Rel Density (%) | IV (%) |                   | Freq (%)                                  | C     | S     | LHS      | HHS            | Freq (%) | Rel Density (%) |                   | IV (%) | Freq (%) | Life form <sup>A</sup> | Dispersal mode <sup>B</sup> | Fire Response <sup>C</sup> |
|                  |                                                       |                                           |             |               |               |                |                 |        |                   |                                           |       |       |          |                |          |                 |                   |        |          |                        |                             |                            |
| XANTHORRHOEACEAE | <i>Lomandra multiflora</i> subsp. <i>multiflora</i>   |                                           |             |               |               |                |                 |        | 20.0              |                                           |       |       |          |                |          |                 |                   | HE     | myr      | R                      |                             |                            |
| PROTEACEAE       | <i>Lomatia ilicifolia</i>                             |                                           |             |               |               |                |                 |        | 5.0               |                                           |       |       |          |                |          |                 |                   | P      | ane      | R                      |                             |                            |
| FABACEAE         | <i>Lotus</i> sp.                                      |                                           |             |               |               |                |                 |        |                   | 0.0                                       | 0.0   | 0.0   | 30.2     | 6.3            | 0.03     | 6.3             |                   | HPr    |          |                        |                             |                            |
| JUNCACEAE        | <i>Luzula meridionalis</i> subsp. <i>densiflora</i>   |                                           |             |               |               |                |                 |        |                   |                                           |       |       |          |                |          |                 | 12.5              | HE     | myr      | R                      |                             |                            |
| JUNCACEAE        | <i>Luzula meridionalis</i> subsp. <i>flaccida</i>     | 30.2                                      | 30.2        | 15.1          | 15.1 NS       | 10.0           | 0.33            | 10.3   | 5.0               | 90.7                                      | 68.0  | 124.7 | 103.9 NS | 62.5           | 6.78     | 69.3            | 37.5              | HE     | myr      | R                      |                             |                            |
| JUNCACEAE        | <i>Luzula meridionalis</i> subsp. <i>meridionalis</i> |                                           |             |               |               |                |                 |        |                   | 0.0                                       | 30.2  | 0.0   | 0.0      | 6.3            | 0.03     | 6.3             | 6.3               | HE     | myr      | R                      |                             |                            |
| LYCOPODIACEAE    | <i>Lycopodium fastigiatum</i>                         |                                           |             |               |               |                |                 |        |                   |                                           |       |       |          |                |          |                 | 6.3               | C      | mob      | R                      |                             |                            |
| PRIMULACEAE      | <i>Lysimachia arvensis</i> *                          | 30.2                                      | 121.0       | 211.7         | 121.0         | 5.0            | 0.44            | 5.4    |                   |                                           |       |       |          |                |          |                 |                   | T      | bar      | S                      |                             |                            |
| ROSACEAE         | <i>Malus pumila</i> *                                 | 121.0                                     | 0.0         | 0.0           | 0.0           | 5.0            | 0.11            | 5.1    |                   |                                           |       |       |          |                |          |                 | 6.3               | P      | end      |                        |                             |                            |
| POACEAE          | <i>Microleana stipoides</i> var. <i>stipoides</i>     | 26.9                                      | 23.5        | 0.0           | 6.7 NS        | 30.0           | 0.47            | 30.5   | 30.0              | 0.0                                       | 0.0   | 0.0   | 60.5     | 18.8           | 0.20     | 18.9            | 6.3               | HF     | epi      | R                      |                             |                            |
| ASTERACEAE       | <i>Microseris</i> sp.                                 |                                           |             |               |               |                |                 |        |                   |                                           |       |       |          |                |          |                 | 25.0              | HE     | ane      | R                      |                             |                            |
| ORCHIDACEAE      | <i>Microtis unifolia</i>                              | 30.2                                      | 0.0         | 0.0           | 0.0           | 10.0           | 0.06            | 10.1   |                   |                                           |       |       |          |                |          |                 |                   | G      | mob      | R                      |                             |                            |
| BORAGINACEAE     | <i>Myosotis australis</i>                             |                                           |             |               |               |                |                 |        |                   |                                           |       |       |          |                |          |                 | 6.3               | HP     |          | S                      |                             |                            |
| ASTERACEAE       | <i>Olearia alpicola</i>                               |                                           |             |               |               |                |                 |        |                   |                                           |       |       |          |                |          |                 | 6.3               | P      | ane      |                        |                             |                            |
| ASTERACEAE       | <i>Olearia megalophylla</i>                           |                                           |             |               |               |                |                 |        |                   |                                           |       |       |          |                |          |                 | 6.3               | P      | ane      | R                      |                             |                            |
| ASTERACEAE       | <i>Olearia myrsinoides</i>                            |                                           |             |               |               |                |                 |        | 5.0               |                                           |       |       |          |                |          |                 |                   | P      | ane      | R                      |                             |                            |
| ASTERACEAE       | <i>Olearia phlogopappa</i> subsp. <i>flavescens</i>   |                                           |             |               |               |                |                 |        |                   | 15.1                                      | 30.2  | 0.0   | 105.8    | 12.5           | 0.33     | 12.8            | 50.0              | P      | ane      | SR                     |                             |                            |
| ASTERACEAE       | <i>Olearia speciosa</i>                               |                                           |             |               |               |                |                 |        |                   | 0.0                                       | 0.0   | 30.2  | 0.0      | 6.3            | 0.03     | 6.3             | 25.0              | P      | ane      |                        |                             |                            |
| RUBIACEAE        | <i>Opercularia varia</i>                              | 0.0                                       | 0.0         | 30.2          | 20.2          | 15.0           | 0.14            | 15.1   | 25.0              |                                           |       |       |          |                |          |                 |                   | HPr    | myr      | Sr                     |                             |                            |
| APIACEAE         | <i>Oreomyrrhis eriopoda</i>                           | 60.5                                      | 0.0         | 0.0           | 0.0           | 5.0            | 0.06            | 5.1    |                   | 154.2                                     | 229.8 | 163.3 | 205.6 NS | 50.0           | 8.23     | 58.2            | 62.5              | HE     | bar      | S                      |                             |                            |
| PROTEACEAE       | <i>Orites lancifolius</i>                             |                                           |             |               |               |                |                 |        |                   |                                           |       |       |          |                |          |                 | 6.3               | P      | ane      | R                      |                             |                            |
| FABACEAE         | <i>Oxylobium ellipticum</i>                           |                                           |             |               |               |                |                 |        |                   |                                           |       |       |          |                |          |                 | 6.3               | P      | myr      | R                      |                             |                            |
| ASTERACEAE       | <i>Ozothamnus cuppressoides</i>                       |                                           |             |               |               |                |                 |        |                   |                                           |       |       |          |                |          |                 | 6.3               | P      | ane      | S                      |                             |                            |
| ASTERACEAE       | <i>Ozothamnus rogersianus</i>                         | 0.0                                       | 0.0         | 30.2          | 0.0           | 5.0            | 0.03            | 5.0    |                   |                                           |       |       |          |                |          |                 |                   | P      | ane      |                        |                             |                            |
| ASTERACEAE       | <i>Ozothamnus secundiflorus</i>                       |                                           |             |               |               |                |                 |        |                   | 0.0                                       | 30.2  | 0.0   | 0.0      | 6.3            | 0.03     | 6.3             | 12.5              | P      | ane      | R                      |                             |                            |
| BIGNONIACEAE     | <i>Pandorea pandorana</i>                             | 15.1                                      | 0.0         | 30.2          | 15.1          | 5.0            | 0.11            | 5.1    | 20.0              |                                           |       |       |          |                |          |                 |                   | P      | ane      | SR                     |                             |                            |
| GERANIACEAE      | <i>Pelargonium helmsii</i>                            |                                           |             |               |               |                |                 |        |                   | 0.0                                       | 0.0   | 121.0 | 151.2    | 6.3            | 0.60     | 6.8             |                   | HPr    | ane      | SR                     |                             |                            |
| GERANIACEAE      | <i>Pelargonium littorale</i>                          | <b>3.8a</b>                               | <b>3.8a</b> | <b>249.5b</b> | <b>404.4b</b> | 25.0           | 4.84            | 29.8   |                   |                                           |       |       |          |                |          |                 |                   | HPr    | ane      |                        |                             |                            |
| PROTEACEAE       | <i>Persoonia chamaepeuce</i>                          |                                           |             |               |               |                |                 |        | 5.0               |                                           |       |       |          |                |          |                 |                   | C      | end      | R                      |                             |                            |
| PROTEACEAE       | <i>Persoonia confertiflora</i>                        |                                           |             |               |               |                |                 |        | 20.0              |                                           |       |       |          |                |          |                 |                   | P      | end      | R                      |                             |                            |
| PHYLLANTHACEAE   | <i>Phyllanthus hirtellus</i>                          |                                           |             |               |               |                |                 |        | 20.0              |                                           |       |       |          |                |          |                 |                   | P      | bar      | Rs                     |                             |                            |
| ASTERACEAE       | <i>Picris</i> sp.                                     |                                           |             |               |               |                |                 |        |                   | 30.2                                      | 0.0   | 0.0   | 0.0      | 6.3            | 0.03     | 6.3             | 25.0              | HP     | ane      | S                      |                             |                            |
| THYMELAEACEAE    | <i>Pimelea alpina</i>                                 |                                           |             |               |               |                |                 |        |                   |                                           |       |       |          |                |          |                 | 31.3              | C      |          | R                      |                             |                            |
| THYMELAEACEAE    | <i>Pimelea axiflora</i> subsp. <i>axiflora</i>        |                                           |             |               |               |                |                 |        |                   |                                           |       |       |          |                |          |                 | 12.5              | P      | myr      | S                      |                             |                            |
| THYMELAEACEAE    | <i>Pimelea humilis</i>                                |                                           |             |               |               |                |                 |        | 10.0              |                                           |       |       |          |                |          |                 |                   | P      |          | SR                     |                             |                            |
| THYMELAEACEAE    | <i>Pimelea ligustrina</i>                             |                                           |             |               |               |                |                 |        |                   |                                           |       |       |          |                |          |                 | 18.8              | P      |          | R                      |                             |                            |

|                 |                                                      | Shrubby Dry Forest                        |       |       |          |                |                 |        |          | Sub-Alpine Woodland |                                           |               |               |          |                 |                 |          |                        |                             |                            |                             |                            |
|-----------------|------------------------------------------------------|-------------------------------------------|-------|-------|----------|----------------|-----------------|--------|----------|---------------------|-------------------------------------------|---------------|---------------|----------|-----------------|-----------------|----------|------------------------|-----------------------------|----------------------------|-----------------------------|----------------------------|
|                 |                                                      | Soil Seed Bank (density m <sup>-2</sup> ) |       |       |          | Soil Seed Bank |                 |        |          | Extant Vegetation   | Soil Seed Bank (density m <sup>-2</sup> ) |               |               |          | Soil Seed Bank  |                 |          |                        | Extant Vegetation           | Trait                      |                             |                            |
|                 |                                                      | C                                         | S     | LHS   | HHS      | Freq (%)       | Rel Density (%) | IV (%) | Freq (%) |                     | C                                         | S             | LHS           | HHS      | Freq (%)        | Rel Density (%) | IV (%)   | Freq (%)               |                             | Life form <sup>A</sup>     | Dispersal mode <sup>B</sup> | Fire Response <sup>C</sup> |
| Family          | Species                                              | C                                         | S     | LHS   | HHS      | Freq (%)       | Rel Density (%) | IV (%) | Freq (%) | C                   | S                                         | LHS           | HHS           | Freq (%) | Rel Density (%) | IV (%)          | Freq (%) | Life form <sup>A</sup> | Dispersal mode <sup>B</sup> | Fire Response <sup>C</sup> |                             |                            |
| PLANTAGINACEAE  | <i>Plantago coronopus</i> subsp. <i>coronopus</i> *  |                                           |       |       |          |                |                 |        |          | 0.0                 | 15.1                                      | 15.1          | 0.0           | 12.5     | 0.07            | 12.6            |          | HF                     | bar                         | S                          |                             |                            |
| PLANTAGINACEAE  | <i>Plantago debilis</i>                              | 393.1                                     | 151.2 | 317.5 | 151.2 NS | 10.0           | 1.85            | 11.9   | 5.0      |                     |                                           |               |               |          |                 |                 |          | HF                     | bar                         | S                          |                             |                            |
| PLANTAGINACEAE  | <i>Plantago euryphylla</i>                           |                                           |       |       |          |                |                 |        |          |                     |                                           |               |               |          |                 |                 | 6.3      | HF                     | bar                         | R                          |                             |                            |
| PLANTAGINACEAE  | <i>Plantago</i> sp.                                  |                                           |       |       |          |                |                 |        | 10.0     |                     |                                           |               |               |          |                 |                 |          | HF                     |                             |                            |                             |                            |
| FABACEAE        | <i>Platylobium</i> sp.                               |                                           |       |       |          |                |                 |        | 5.0      |                     |                                           |               |               |          |                 |                 |          | P                      | myr                         |                            |                             |                            |
| APIACEAE        | <i>Platysace ericoides</i>                           | 0.0                                       | 0.0   | 30.2  | 0.0      | 5.0            | 0.03            | 5.0    | 10.0     |                     |                                           |               |               |          |                 |                 |          | C                      | bar                         | Sr                         |                             |                            |
| APIACEAE        | <i>Platysace lanceolata</i>                          |                                           |       |       |          |                |                 |        | 15.0     |                     |                                           |               |               |          |                 |                 |          | P                      | bar                         | Rs                         |                             |                            |
| POACEAE         | <i>Poa annua</i> *                                   | 0.0                                       | 7.6   | 105.8 | 7.6      | 15.0           | 0.44            | 15.4   |          |                     |                                           |               |               |          |                 |                 |          | T                      | bar                         | S                          |                             |                            |
| POACEAE         | <i>Poa ensiformis</i>                                | 0.0                                       | 15.1  | 15.1  | 75.6     | 10.0           | 0.19            | 10.2   |          | 70.6                | 151.2                                     | 20.2          | 0.0           | 12.5     | 0.79            | 13.3            | 12.5     | HE                     | bar                         | R                          |                             |                            |
| POACEAE         | <i>Poa hothamensis</i> var. <i>hothamensis</i>       |                                           |       |       |          |                |                 |        |          | <b>123.8a</b>       | <b>132.3a</b>                             | <b>264.6b</b> | <b>247.6b</b> | 100.0    | 26.88           | 126.9           | 75.0     | HE                     | bar                         | R                          |                             |                            |
| POACEAE         | <i>Poa petrophila</i>                                |                                           |       |       |          |                |                 |        |          |                     |                                           |               |               |          |                 |                 | 12.5     | HE                     | bar                         |                            |                             |                            |
| POACEAE         | <i>Poa pratensis</i> *                               |                                           |       |       |          |                |                 |        |          |                     |                                           |               |               |          |                 |                 | 6.3      | HE                     | bar                         | SR                         |                             |                            |
| POACEAE         | <i>Poa sieberiana</i> var. <i>sieberiana</i>         | 26.5                                      | 28.3  | 45.4  | 77.5 NS  | 50.0           | 2.60            | 52.6   | 80.0     | 30.2                | 105.8                                     | 272.1         | 0.0           | 6.3      | 0.89            | 7.1             | 31.3     | HE                     | mob                         | R                          |                             |                            |
| POACEAE         | <i>Poa tenera</i>                                    | 16.8                                      | 6.7   | 40.3  | 20.2 NS  | 30.0           | 0.69            | 30.7   |          | 7.6                 | 0.0                                       | 0.0           | 158.8         | 18.8     | 0.73            | 19.5            | 6.3      | HE                     | bar                         | R                          |                             |                            |
| PODOCARPACEAE   | <i>Podocarpus lawrenciana</i>                        |                                           |       |       |          |                |                 |        |          |                     |                                           |               |               |          |                 |                 | 6.3      | P                      | end                         | S                          |                             |                            |
| ASTERACEAE      | <i>Podolepis</i> sp.                                 |                                           |       |       |          |                |                 |        |          |                     |                                           |               |               |          |                 |                 | 12.5     | HP                     | ane                         | R                          |                             |                            |
| FABACEAE        | <i>Podolobium alpestre</i>                           |                                           |       |       |          |                |                 |        |          | <b>0.0a</b>         | <b>8.2ac</b>                              | <b>52.2b</b>  | <b>46.7bc</b> | 43.8     | 1.29            | 45.0            | 62.5     | P                      | myr                         | R                          |                             |                            |
| ARALIACEAE      | <i>Polyschias sambucifolia</i> subsp. 3              |                                           |       |       |          |                |                 |        |          |                     |                                           |               |               |          |                 |                 | 50.0     | P                      | end                         | Rs                         |                             |                            |
| DRYOPTERIDACEAE | <i>Polystichum proliferum</i>                        |                                           |       |       |          |                |                 |        |          |                     |                                           |               |               |          |                 |                 | 56.3     | C                      | mob                         | R                          |                             |                            |
| RHAMNACEAE      | <i>Pomaderris intermedia</i>                         | 0.0                                       | 0.0   | 60.5  | 0.0      | 5.0            | 0.06            | 5.1    | 5.0      |                     |                                           |               |               |          |                 |                 |          | P                      | myr                         | S                          |                             |                            |
| RUBIACEAE       | <i>Pomax umbellata</i>                               |                                           |       |       |          |                |                 |        | 25.0     |                     |                                           |               |               |          |                 |                 |          | C                      | bar                         | S                          |                             |                            |
| PHYLLANTHACEAE  | <i>Poranthera microphylla</i>                        | 48.1                                      | 37.1  | 37.1  | 59.1 NS  | 65.0           | 3.65            | 68.6   | 20.0     | 20.2                | 0.0                                       | 30.2          | 30.2          | 18.8     | 0.26            | 19.0            | 12.5     | T                      | mob                         | S                          |                             |                            |
| LAMIACEAE       | <i>Prostanthera cuneata</i>                          |                                           |       |       |          |                |                 |        |          |                     |                                           |               |               |          |                 |                 | 12.5     | P                      | bar                         | R                          |                             |                            |
| LAMIACEAE       | <i>Prostanthera saxicola</i> var. <i>bracteolata</i> |                                           |       |       |          |                |                 |        | 5.0      |                     |                                           |               |               |          |                 |                 |          | P                      | bar                         | S                          |                             |                            |
| LAMIACEAE       | <i>Prunella vulgaris</i> *                           |                                           |       |       |          |                |                 |        |          |                     |                                           |               |               |          |                 |                 | 6.3      | C                      |                             | S                          |                             |                            |
| ORCHIDACEAE     | <i>Pterostylis</i> sp.                               | 12.1                                      | 18.1  | 0.0   | 0.0      | 20.0           | 0.14            | 20.1   | 20.0     | 15.1                | 15.1                                      | 15.1          | 0.0           | 12.5     | 0.10            | 12.6            |          | G                      | mob                         | R                          |                             |                            |
| FABACEAE        | <i>Pultenaea foliosa</i>                             |                                           |       |       |          |                |                 |        | 5.0      |                     |                                           |               |               |          |                 |                 |          | P                      | myr                         |                            |                             |                            |
| FABACEAE        | <i>Pultenaea humilis</i>                             | 0.0                                       | 0.0   | 0.0   | 30.2     | 5.0            | 0.03            | 5.0    |          |                     |                                           |               |               |          |                 |                 |          | P                      | myr                         | S                          |                             |                            |
| FABACEAE        | <i>Pultenea daphnoides</i>                           | 60.5                                      | 30.2  | 30.2  | 60.5     | 5.0            | 0.17            | 5.2    | 5.0      |                     |                                           |               |               |          |                 |                 |          | P                      | myr                         | S                          |                             |                            |
| RANUNCULACEAE   | <i>Ranunculus plebeius</i>                           |                                           |       |       |          |                |                 |        |          |                     |                                           |               |               |          |                 |                 | 25.0     | HP                     | epi                         |                            |                             |                            |
| RANUNCULACEAE   | <i>Ranunculus scapiger</i>                           |                                           |       |       |          |                |                 |        |          |                     |                                           |               |               |          |                 |                 | 12.5     | HP                     | epi                         |                            |                             |                            |
| POACEAE         | <i>Rytidosperma indutum</i>                          | 136.1                                     | 0.0   | 0.0   | 0.0      | 5.0            | 0.25            | 5.2    |          |                     |                                           |               |               |          |                 |                 |          | HE                     | epi                         |                            |                             |                            |
| PITTOSPORACEAE  | <i>Rhytidosporum procumbens</i>                      | 0.0                                       | 0.0   | 18.1  | 12.1     | 20.0           | 0.14            | 20.1   | 20.0     |                     |                                           |               |               |          |                 |                 |          | C                      | bar                         | Sr                         |                             |                            |
| ERICACEAE       | <i>Richea continentis</i>                            |                                           |       |       |          |                |                 |        |          | 0.0                 | 0.0                                       | 30.2          | 0.0           | 6.3      | 0.03            | 6.3             |          | P                      | bar                         | S                          |                             |                            |
| BRASSICACEAE    | <i>Rorippa dictyosperma</i>                          | 0.0                                       | 60.5  | 0.0   | 30.2     | 5.0            | 0.08            | 5.1    |          |                     |                                           |               |               |          |                 |                 |          | HP                     | bar                         | S                          |                             |                            |
| ROSACEAE        | <i>Rubus parviflorus</i>                             |                                           |       |       |          |                |                 |        |          |                     |                                           |               |               |          |                 |                 | 12.5     | P                      | end                         | R                          |                             |                            |

|                  |                                                       | Shrubby Dry Forest                        |              |              |               |                |                 |        |          | Sub-Alpine Woodland |                                           |               |              |          |                 |                 |          |                        |                             |                            |                             |                            |
|------------------|-------------------------------------------------------|-------------------------------------------|--------------|--------------|---------------|----------------|-----------------|--------|----------|---------------------|-------------------------------------------|---------------|--------------|----------|-----------------|-----------------|----------|------------------------|-----------------------------|----------------------------|-----------------------------|----------------------------|
|                  |                                                       | Soil Seed Bank (density m <sup>-2</sup> ) |              |              |               | Soil Seed Bank |                 |        |          | Extant Vegetation   | Soil Seed Bank (density m <sup>-2</sup> ) |               |              |          | Soil Seed Bank  |                 |          |                        | Extant Vegetation           | Trait                      |                             |                            |
|                  |                                                       | C                                         | S            | LHS          | HHS           | Freq (%)       | Rel Density (%) | IV (%) | Freq (%) |                     | C                                         | S             | LHS          | HHS      | Freq (%)        | Rel Density (%) | IV (%)   | Freq (%)               |                             | Life form <sup>A</sup>     | Dispersal mode <sup>B</sup> | Fire Response <sup>C</sup> |
| Family           | Species                                               | C                                         | S            | LHS          | HHS           | Freq (%)       | Rel Density (%) | IV (%) | Freq (%) | C                   | S                                         | LHS           | HHS          | Freq (%) | Rel Density (%) | IV (%)          | Freq (%) | Life form <sup>A</sup> | Dispersal mode <sup>B</sup> | Fire Response <sup>C</sup> |                             |                            |
| POACEAE          | <i>Rytidosperma racemosum</i> var. <i>racemosum</i>   | 30.2                                      | 0.0          | 0.0          | 0.0           | 5.0            | 0.03            | 5.0    |          |                     |                                           |               |              |          |                 |                 |          | HE                     | epi                         | R                          |                             |                            |
| POACEAE          | <i>Rytidosperma</i> sp.                               | 0.0                                       | 0.0          | 0.0          | 30.2          | 5.0            | 0.03            | 5.0    | 15.0     | 30.2                | 0.0                                       | 0.0           | 0.0          | 6.3      | 0.03            | 6.3             |          | HE                     | epi                         | R                          |                             |                            |
| CARYOPHYLLACEAE  | <i>Scleranthus</i> sp.                                |                                           |              |              |               |                |                 |        |          |                     |                                           |               |              |          |                 |                 | 6.3      | C                      |                             | S                          |                             |                            |
| ASTERACEAE       | <i>Senecio extensus</i>                               |                                           |              |              |               |                |                 |        |          | 0.0                 | 60.5                                      | 0.0           | 0.0          | 6.3      | 0.07            | 6.3             | 18.8     | HPr                    | ane                         |                            |                             |                            |
| ASTERACEAE       | <i>Senecio gunnii</i>                                 |                                           |              |              |               |                |                 |        |          | 25.2                | 25.2                                      | 0.0           | 10.1 NS      | 37.5     | 0.40            | 37.9            | 62.5     | HPr                    | ane                         | Rs                         |                             |                            |
| ASTERACEAE       | <i>Senecio hispidulus</i>                             | 0.0                                       | 0.0          | 15.1         | 15.1          | 10.0           | 0.06            | 10.1   |          |                     |                                           |               |              |          |                 |                 |          | T                      | ane                         | Sr                         |                             |                            |
| ASTERACEAE       | <i>Senecio linearifolius</i> subsp. <i>latifolius</i> |                                           |              |              |               |                |                 |        |          |                     |                                           |               |              |          |                 |                 | 18.8     | C                      | ane                         | S                          |                             |                            |
| ASTERACEAE       | <i>Senecio linearifolius</i> var. <i>denticulatis</i> | 30.2                                      | 0.0          | 30.2         | 30.2          | 5.0            | 0.08            | 5.1    | 5.0      | 30.2                | 0.0                                       | 0.0           | 0.0          | 6.3      | 0.03            | 6.3             |          | C                      | ane                         | S                          |                             |                            |
| ASTERACEAE       | <i>Senecio pinnatifolius</i> var. <i>alpinus</i>      |                                           |              |              |               |                |                 |        |          | 0.0                 | 15.1                                      | 0.0           | 15.1         | 12.5     | 0.07            | 12.6            |          | HPr                    | ane                         | R                          |                             |                            |
| ASTERACEAE       | <i>Senecio pinnatifolius</i> var. <i>lanceolatus</i>  |                                           |              |              |               |                |                 |        |          | 30.2                | 0.0                                       | 0.0           | 0.0          |          | 0.03            | 0.0             | 6.3      | HPr                    | ane                         | R                          |                             |                            |
| ASTERACEAE       | <i>Senecio prenanthoides</i>                          | 7.6                                       | 0.0          | 7.6          | 15.1          | 15.0           | 0.11            | 15.1   | 15.0     |                     |                                           |               |              | 6.3      |                 | 6.3             | 25.0     | HP                     | ane                         | S                          |                             |                            |
| ASTERACEAE       | <i>Senecio vellioides</i>                             |                                           |              |              |               |                |                 |        |          | 10.1                | 10.1                                      | 0.0           | 10.1         | 18.8     | 0.10            | 18.8            |          | T                      | ane                         | S                          |                             |                            |
| SOLANACEAE       | <i>Solanum lacinatum/aviculare</i>                    | 0.0                                       | 0.0          | 15.1         | 15.1          | 5.0            | 0.06            | 5.1    |          |                     |                                           |               |              |          |                 |                 |          | P                      | end                         | S                          |                             |                            |
| SOLANACEAE       | <i>Solanum prinophyllum</i>                           | 12.1                                      | 6.0          | 24.2         | 12.1 NS       | 25.0           | 0.25            | 25.2   | 5.0      |                     |                                           |               |              |          |                 |                 |          | HPr                    | end                         | S                          |                             |                            |
| ASTERACEAE       | <i>Sonchus oleraceus</i> *                            |                                           |              |              |               |                |                 |        | 5.0      | 0.0                 | 30.2                                      | 0.0           | 0.0          | 6.3      | 0.03            | 6.3             | 6.3      | T                      | ane                         | Sr                         |                             |                            |
| RHAMNACEAE       | <i>Spyridium parvifolium</i>                          |                                           |              |              |               |                |                 |        | 10.0     |                     |                                           |               |              |          |                 |                 |          | P                      | myr                         | Sr                         |                             |                            |
| STACKHOUSIACEAE  | <i>Stackhousia monogyna</i>                           |                                           |              |              |               |                |                 |        | 5.0      |                     |                                           |               |              |          |                 |                 | 18.8     | HPr                    | bar                         | SR                         |                             |                            |
| CARYOPHYLLACEAE  | <i>Stellaria pungens</i>                              | 0.0                                       | 0.0          | 0.0          | 30.2          | 5.0            | 0.03            | 5.0    | 10.0     | <b>3.4a</b>         | <b>3.4ab</b>                              | <b>26.9ab</b> | <b>53.8b</b> | 43.8     | 0.86            | 44.6            | 81.3     | HPr                    | bar                         | Sr                         |                             |                            |
| STYLIDIACEAE     | <i>Stylidium armeria</i> subsp. <i>armeria</i>        |                                           |              |              |               |                |                 |        |          | 7.6                 | 7.6                                       | 15.1          | 22.7         | 25.0     | 0.23            | 25.2            | 43.8     | HE                     | bar                         | Rs                         |                             |                            |
| ASPHODELACEAE    | <i>Stypandra glauca</i>                               | <b>20.2b</b>                              | <b>10.1a</b> | <b>95.8b</b> | <b>171.3b</b> | 35.0           | 3.26            | 38.3   | 60.0     |                     |                                           |               |              |          |                 |                 |          | HPr                    | bar                         | R                          |                             |                            |
| ASTERACEAE       | <i>Symphyotrichum subulatum</i> *                     | 0.0                                       | 0.0          | 0.0          | 30.2          | 5.0            | 0.03            | 5.0    |          |                     |                                           |               |              |          |                 |                 |          | T                      | ane                         | S                          |                             |                            |
| ASTERACEAE       | <i>Taraxacum</i> sp.                                  |                                           |              |              |               |                |                 |        |          |                     |                                           |               |              |          |                 |                 | 18.8     | HF                     | ane                         | S                          |                             |                            |
| WINTERACEAE      | <i>Tasmannia lanceolata</i>                           |                                           |              |              |               |                |                 |        |          |                     |                                           |               |              |          |                 |                 | 6.3      | P                      | end                         | Sr                         |                             |                            |
| WINTERACEAE      | <i>Tasmannia xerophila</i> subsp. <i>xerophila</i>    |                                           |              |              |               |                |                 |        |          |                     |                                           |               |              |          |                 |                 | 62.5     | P                      | end                         | S                          |                             |                            |
| POACEAE          | <i>Tetrarrhena juncea</i>                             | 30.2                                      | 30.2         | 75.6         | 7.6           | 15.0           | 0.53            | 15.5   |          |                     |                                           |               |              |          |                 |                 |          | HPr                    | bar                         | R                          |                             |                            |
| TREMANDRACEAE    | <i>Tetratheca ciliata</i>                             |                                           |              |              |               |                |                 |        | 5.0      |                     |                                           |               |              |          |                 |                 |          | C                      | myr                         | Sr                         |                             |                            |
| ELAEOCARPACEAE   | <i>Tetratheca labillardierei</i>                      |                                           |              |              |               |                |                 |        | 15.0     |                     |                                           |               |              |          |                 |                 |          | P                      | myr                         | R                          |                             |                            |
| POACEAE          | <i>Themeda triandra</i>                               | 0.0                                       | 0.0          | 0.0          | 60.5          | 5.0            | 0.06            | 5.1    |          |                     |                                           |               |              |          |                 |                 |          | HE                     | epi                         | R                          |                             |                            |
| ASPHODELACEAE    | <i>Tricoryne elatior</i>                              |                                           |              |              |               |                |                 |        | 5.0      |                     |                                           |               |              |          |                 |                 |          | HE                     | bar                         | R                          |                             |                            |
| FABACEAE         | <i>Trifolium cernuum/ glomeratum</i> *                |                                           |              |              |               |                |                 |        |          | 0.0                 | 0.0                                       | 0.0           | 121.0        | 6.3      | 0.13            | 6.4             |          | T                      | bar                         |                            |                             |                            |
| FABACEAE         | <i>Trifolium dubium</i> *                             | 0.0                                       | 0.0          | 0.0          | 30.2          | 5.0            | 0.03            | 5.0    |          | 10.1                | 10.1                                      | 0.0           | 60.5         | 12.5     | 0.26            | 12.8            |          | T                      | bar                         | S                          |                             |                            |
| FABACEAE         | <i>Trifolium repens</i> *                             |                                           |              |              |               |                |                 |        |          | 7.6                 | 0.0                                       | 22.7          | 90.7         | 18.8     | 0.53            | 19.3            | 31.3     | HF                     | bar                         | SR                         |                             |                            |
| FABACEAE         | <i>Trifolium</i> sp.                                  |                                           |              |              |               |                |                 |        |          | 0.0                 | 10.1                                      | 10.1          | 10.1         | 18.8     | 0.10            | 18.8            |          | T                      | bar                         |                            |                             |                            |
| SCROPHULARIACEAE | <i>Verbascum</i> spp. *                               |                                           |              |              |               |                |                 |        |          |                     |                                           |               |              |          |                 |                 | 6.3      | T                      |                             | R                          |                             |                            |

|                |                                                        | Shrubby Dry Forest                        |       |       |       |                |                 |        |          | Sub-Alpine Woodland |                                           |       |       |          |                 |        |          |                        |                             |                            |    |  |
|----------------|--------------------------------------------------------|-------------------------------------------|-------|-------|-------|----------------|-----------------|--------|----------|---------------------|-------------------------------------------|-------|-------|----------|-----------------|--------|----------|------------------------|-----------------------------|----------------------------|----|--|
|                |                                                        | Soil Seed Bank (density m <sup>-2</sup> ) |       |       |       | Soil Seed Bank |                 |        |          | Extant Vegetation   | Soil Seed Bank (density m <sup>-2</sup> ) |       |       |          | Soil Seed Bank  |        |          |                        | Extant Vegetation           | Trait                      |    |  |
|                |                                                        |                                           |       |       |       |                |                 |        |          |                     |                                           |       |       |          |                 |        |          |                        |                             |                            |    |  |
| Family         | Species                                                | C                                         | S     | LHS   | HHS   | Freq (%)       | Rel Density (%) | IV (%) | Freq (%) | C                   | S                                         | LHS   | HHS   | Freq (%) | Rel Density (%) | IV (%) | Freq (%) | Life form <sup>A</sup> | Dispersal mode <sup>B</sup> | Fire Response <sup>C</sup> |    |  |
| PLANTAGINACEAE | <i>Veronica calycina</i>                               | 25.2                                      | 15.1  | 10.1  | 65.5  | NS             | 25.0            | 0.64   | 25.6     | 20.0                |                                           |       |       |          |                 |        | 6.3      | C                      | bar                         | SR                         |    |  |
| PLANTAGINACEAE | <i>Veronica derwentana</i> subsp. <i>maideniana</i>    |                                           |       |       |       |                |                 |        |          |                     |                                           |       |       |          |                 |        | 25.0     | C                      | bar                         | R                          |    |  |
| PLANTAGINACEAE | <i>Veronica perfoliata</i>                             | 6.0                                       | 0.0   | 24.2  | 12.1  |                | 20.0            | 0.19   | 20.2     | 20.0                |                                           |       |       |          |                 |        |          | C                      | bar                         | SR                         |    |  |
| PLANTAGINACEAE | <i>Veronica plebeia</i>                                | 12.1                                      | 24.2  | 6.0   | 42.3  | NS             | 35.0            | 0.77   | 35.8     | 5.0                 |                                           |       |       |          |                 |        |          | C                      | bar                         | S                          |    |  |
| PLANTAGINACEAE | <i>Veronica serpyllifolia</i>                          |                                           |       |       |       |                |                 |        |          | 90.7                | 0.0                                       | 0.0   | 0.0   | 6.3      | 0.10            | 6.3    | 6.3      | HPr                    | bar                         |                            |    |  |
| VIOLACEAE      | <i>Viola arvensis</i> *                                |                                           |       |       |       |                |                 |        |          | 15.1                | 10.1                                      | 0.0   | 10.1  | 37.5     | 0.23            | 37.7   | 31.3     | T                      |                             |                            |    |  |
| VIOLACEAE      | <i>Viola betonicifolia</i> subsp. <i>betonicifolia</i> |                                           |       |       |       |                |                 |        |          | 7.6                 | 52.9                                      | 0.0   | 45.4  | 25.0     | 0.46            | 25.5   | 75.0     | HE                     | myr                         | R                          |    |  |
| VIOLACEAE      | <i>Viola hederacea</i> s.l.                            | 18.1                                      | 36.3  | 24.2  | 42.3  | NS             | 20.0            | 0.55   | 20.6     | 20.0                | 0.0                                       | 30.2  | 0.0   | 0.0      | 6.3             | 0.03   | 6.3      | 6.3                    | HF                          | myr                        | Sr |  |
| CAMPANULACEAE  | <i>Wahlenbergia capillaris communis</i>                | 20.2                                      | 10.1  | 0.0   | 0.0   |                | 10.0            | 0.08   | 10.1     |                     |                                           |       |       |          |                 |        |          | HPr                    | mob                         | Sr                         |    |  |
| CAMPANULACEAE  | <i>Wahlenbergia communis graniticola</i>               | 17.3                                      | 4.3   | 38.9  | 25.9  | NS             | 30.0            | 0.55   | 30.6     |                     |                                           |       |       |          |                 |        |          | HPr                    | mob                         | R                          |    |  |
| CAMPANULACEAE  | <i>Wahlenbergia gloriosa</i>                           |                                           |       |       |       |                |                 |        |          | 0.0                 | 0.0                                       | 30.2  | 0.0   | 6.3      | 0.03            | 6.3    |          | HPr                    | mob                         | R                          |    |  |
| CAMPANULACEAE  | <i>Wahlenbergia gracilis</i>                           | 90.7                                      | 68.0  | 33.3  | 90.7  | NS             | 60.0            | 5.17   | 65.2     | 0.0                 | 70.6                                      | 20.2  | 0.0   | 18.8     | 0.30            | 19.0   |          | HPr                    | mob                         | Rs                         |    |  |
| CAMPANULACEAE  | <i>Wahlenbergia graniticola</i>                        | 40.3                                      | 10.1  | 0.0   | 30.2  |                | 15.0            | 0.22   | 15.2     |                     |                                           |       |       |          |                 |        |          | HPr                    | mob                         | R                          |    |  |
| CAMPANULACEAE  | <i>Wahlenbergia luteola</i>                            | 0.0                                       | 30.2  | 0.0   | 15.1  |                | 10.0            | 0.08   | 10.1     |                     |                                           |       |       |          |                 |        |          | HPr                    | mob                         | R                          |    |  |
| CAMPANULACEAE  | <i>Wahlenbergia multicaulis</i>                        | 17.3                                      | 362.9 | 21.6  | 8.6   | NS             | 30.0            | 2.63   | 32.6     | 181.4               | 196.5                                     | 574.5 | 423.3 | NS       | 6.3             | 3.01   | 9.3      | 6.3                    | G                           | mob                        | R  |  |
| CAMPANULACEAE  | <i>Wahlenbergia</i> sp.                                | 75.6                                      | 51.4  | 117.9 | 30.2  | NS             | 35.0            | 2.52   | 37.5     | 30.0                | 0.0                                       | 20.2  | 0.0   | 20.2     | 18.8            | 0.13   | 18.9     |                        | HPr                         | mob                        |    |  |
| CAMPANULACEAE  | <i>Wahlenbergia stricta</i> subsp. <i>stricta</i>      | 163.3                                     | 237.4 | 161.8 | 193.5 | NS             | 55.0            | 13.82  | 68.8     | 0.0                 | 0.0                                       | 0.0   | 90.7  | 6.3      | 0.10            | 6.3    |          | HPr                    | mob                         | Sr                         |    |  |

<sup>A</sup> C: chamaephyte (plants whose branch system remains below 0.5 m, or plants that die back to below that height, i.e. dwarf shrubs); EPI: epiphyte (a plant that has no roots in the soil and grows upon another plant or object merely for physical support); G: geophyte (plants with seasonal reduction to below ground storage organ); HE: erect rosette (all leaves radical, leaves always erect); HF: flat or versatile rosette (all leaves radical, leaves flat or erect depending on conditions); HP: partial-rosette (radical and cauline leaves present, largest leaves on lower stem); HPr: proto-hemicryptophyte (all leaves cauline, largest leaves towards the middle of stem); and P: phanerophyte (trees and shrubs taller than 0.5 m).

<sup>B</sup> ane: anemochory (pappus, coma, samara or similar attachment); bar: barochory (no apparent seed dispersal mechanism); end: endozoochory (fleshy fruit); epi: epizoochory (barbs, hooks, burrs or awns enabling adhesion to animal fur); mob: mobile (barochores with seed dimensions <0.5 mm, and mass generally < 0.1 mg); and myr: myrmecochory (eliosome attached to seed to attract ants).

<sup>C</sup> R; obligate resprouter (plants that rely on resprouting to regenerate after fire); S: obligate seeder (plants that do not resprout and rely on seeding to regenerate after fire); RS, facultative seeders (plants that are able to resprout and to germinate seeds after fire); Sr: usually killed but sometimes resprouts; and Rs: usually resprouts but sometimes killed.

\* introduced species

**Table S4** Results of the PERMANOVA, testing for the effect of germination treatment (T: C, control; S, smoke; LHS, low heat plus smoke; and HHS, high heat plus smoke) and fire frequency (F, number of fires since 2003) on the richness and density of the germinable soil seed bank in Shrubby Dry Forest and Sub-Alpine Woodland communities. Significant values are indicated in bold. Fire Frequency: Shrubby Dry Forest: UB, Unburnt; S07, Single 2007; S13, Single 2013; D, Double. Sub-Alpine Woodland: UB, Unburnt; S, Single; D, Double; and T, Triple.

|                            | Richness |    |         |        |          |               |              |                                                                              | Density |    |           |          |          |               |              |                                                                           |
|----------------------------|----------|----|---------|--------|----------|---------------|--------------|------------------------------------------------------------------------------|---------|----|-----------|----------|----------|---------------|--------------|---------------------------------------------------------------------------|
|                            | Source   | df | SS      | MS     | Pseudo-F | P(perm)       | Unique Perms | Pairwise                                                                     | Source  | df | SS        | MS       | Pseudo-F | P(perm)       | Unique Perms | Pairwise                                                                  |
| <i>Shrubby Dry Forest</i>  |          |    |         |        |          |               |              |                                                                              |         |    |           |          |          |               |              |                                                                           |
| All Species                | T        | 3  | 4.098   | 1.366  | 5.3707   | <b>0.0012</b> | 9958         |                                                                              | T       | 3  | 7.711     | 2.570    | 5.9000   | <b>0.0015</b> | 9948         | C <sup>a</sup> , S <sup>ab</sup> , LHS <sup>b</sup> , HHS <sup>c</sup>    |
|                            | F        | 3  | 1.278   | 0.426  | 1.6749   | 0.1666        | 9954         |                                                                              | F       | 3  | 0.838     | 0.279    | 0.6416   | 0.6037        | 9949         |                                                                           |
|                            | T x F    | 9  | 4.611   | 0.512  | 2.0144   | <b>0.0324</b> | 9926         | S07: C <sup>ab</sup> , S <sup>a</sup> , LHS <sup>ab</sup> , HHS <sup>b</sup> | T x F   | 9  | 6.070     | 0.674    | 1.5482   | 0.1492        | 9932         |                                                                           |
|                            | Res      | 64 | 16.279  | 0.254  |          |               |              | S13: C <sup>a</sup> , S <sup>a</sup> , LHS <sup>a</sup> , HHS <sup>b</sup>   | Res     | 64 | 27.881    | 0.436    |          |               |              |                                                                           |
|                            | Total    | 79 | 26.266  |        |          |               |              | D: C <sup>a</sup> , S <sup>a</sup> , LHS <sup>b</sup> , HHS <sup>ab</sup>    | Total   | 79 | 42.500    |          |          |               |              |                                                                           |
| Native Species             | T        | 3  | 3.558   | 1.186  | 2.6311   | <b>0.0494</b> | 9949         | C <sup>a</sup> , S <sup>a</sup> , LHS <sup>ab</sup> , HHS <sup>b</sup>       | T       | 3  | 8.443     | 2.814    | 4.2897   | <b>0.0084</b> | 9946         | C <sup>a</sup> , S <sup>ab</sup> , LHS <sup>b</sup> , HHS <sup>c</sup>    |
|                            | F        | 3  | 1.024   | 0.341  | 0.7572   | 0.5449        | 9957         |                                                                              | F       | 3  | 1.087     | 0.362    | 0.5525   | 0.6492        | 9958         |                                                                           |
|                            | T x F    | 9  | 7.129   | 0.792  | 1.7573   | 0.0724        | 9924         |                                                                              | T x F   | 9  | 6.624     | 0.736    | 1.1220   | 0.3657        | 9934         |                                                                           |
|                            | Res      | 64 | 28.850  | 0.451  |          |               |              |                                                                              | Res     | 64 | 41.986    | 0.656    |          |               |              |                                                                           |
|                            | Total    | 79 | 40.561  |        |          |               |              |                                                                              | Total   | 79 | 58.140    |          |          |               |              |                                                                           |
| Introduced Species         | T        | 3  | 15.516  | 5.172  | 1.6050   | 0.1977        | 9952         |                                                                              | T       | 3  | 3252.100  | 1084.000 | 1.3378   | 0.2611        | 9945         |                                                                           |
|                            | F        | 3  | 82.627  | 27.542 | 8.5467   | <b>0.0004</b> | 9958         | UB <sup>a</sup> , S07 <sup>a</sup> , S13 <sup>a</sup> , D <sup>b</sup>       | F       | 3  | 17722.000 | 5907.300 | 7.2901   | <b>0.0004</b> | 9963         | UB <sup>a</sup> ,S07 <sup>a</sup> ,S13 <sup>a</sup> ,D <sup>b</sup>       |
|                            | T x F    | 9  | 14.432  | 1.604  | 0.4976   | 0.8690        | 9954         |                                                                              | T x F   | 9  | 3984.000  | 442.670  | 0.5463   | 0.8450        | 9949         |                                                                           |
|                            | Res      | 64 | 206.250 | 3.223  |          |               |              |                                                                              | Res     | 64 | 51861.000 | 810.320  |          |               |              |                                                                           |
|                            | Total    | 79 | 318.820 |        |          |               |              |                                                                              | Total   | 79 | 76819.000 |          |          |               |              |                                                                           |
| <i>Sub-Alpine Woodland</i> |          |    |         |        |          |               |              |                                                                              |         |    |           |          |          |               |              |                                                                           |
| All Species                | T        | 3  | 0.034   | 0.011  | 0.1803   | 0.9100        | 9954         |                                                                              | T       | 3  | 2.850     | 0.950    | 15.7960  | <b>0.0001</b> | 9947         |                                                                           |
|                            | F        | 3  | 0.469   | 0.156  | 2.5005   | 0.0660        | 9942         |                                                                              | F       | 3  | 0.015     | 0.005    | 0.0821   | 0.9705        | 9946         |                                                                           |
|                            | T x F    | 9  | 0.387   | 0.043  | 0.6874   | 0.7205        | 9930         |                                                                              | T x F   | 9  | 1.410     | 0.157    | 2.6058   | <b>0.0140</b> | 9942         | S: C <sup>a</sup> , S <sup>a</sup> , LHS <sup>b</sup> , HHS <sup>ab</sup> |
|                            | Res      | 48 | 3.004   | 0.063  |          |               |              |                                                                              | Res     | 48 | 2.886     | 0.060    |          |               |              | D: C <sup>a</sup> , S <sup>b</sup> , LHS <sup>b</sup> , HHS <sup>b</sup>  |
|                            | Total    | 63 | 3.894   |        |          |               |              |                                                                              | Total   | 63 | 7.161     |          |          |               |              | T: C <sup>a</sup> , S <sup>a</sup> , LHS <sup>b</sup> , HHS <sup>ab</sup> |
| Native Species             | T        | 3  | 0.065   | 0.022  | 0.2481   | 0.8638        | 9962         |                                                                              | T       | 3  | 2.183     | 0.728    | 11.7590  | <b>0.0001</b> | 9953         |                                                                           |
|                            | F        | 3  | 1.108   | 0.369  | 4.1969   | <b>0.0100</b> | 9957         | UB <sup>ab</sup> , S <sup>a</sup> , D <sup>b</sup> , T <sup>c</sup>          | F       | 3  | 0.019     | 0.006    | 0.1038   | 0.9571        | 9961         |                                                                           |
|                            | T x F    | 9  | 0.959   | 0.107  | 1.2116   | 0.3123        | 9931         |                                                                              | T x F   | 9  | 1.598     | 0.178    | 2.8697   | <b>0.0079</b> | 9916         | S: C <sup>a</sup> , S <sup>a</sup> , LHS <sup>b</sup> , HHS <sup>ab</sup> |
|                            | Res      | 48 | 4.223   | 0.088  |          |               |              |                                                                              | Res     | 48 | 2.970     | 0.062    |          |               |              | D: C <sup>a</sup> , S <sup>b</sup> , LHS <sup>b</sup> , HHS <sup>b</sup>  |
|                            | Total    | 63 | 6.356   |        |          |               |              |                                                                              | Total   | 63 | 6.771     |          |          |               |              |                                                                           |
| Introduced Species         | T        | 3  | 0.575   | 0.192  | 0.0675   | 0.9774        | 9966         |                                                                              | T       | 3  | 3.631     | 1.210    | 0.6975   | 0.5607        | 9955         |                                                                           |
|                            | F        | 3  | 38.706  | 12.902 | 4.5421   | <b>0.0079</b> | 9953         | UB <sup>a</sup> , S <sup>a</sup> , D <sup>b</sup> , T <sup>ab</sup>          | F       | 3  | 30.409    | 10.136   | 5.8410   | <b>0.0018</b> | 9952         | UB <sup>a</sup> , S <sup>a</sup> , D13 <sup>b</sup> , T <sup>ab</sup>     |
|                            | T x F    | 9  | 4.517   | 0.502  | 0.1767   | 0.9954        | 9925         |                                                                              | T x F   | 9  | 6.319     | 0.702    | 0.4046   | 0.9264        | 9951         |                                                                           |
|                            | Res      | 48 | 136.350 | 2.841  |          |               |              |                                                                              | Res     | 48 | 83.300    | 1.735    |          |               |              |                                                                           |
|                            | Total    | 63 | 180.140 |        |          |               |              |                                                                              | Total   | 63 | 123.660   |          |          |               |              |                                                                           |

**Table S5** Results of the PERMANOVA, testing for the effect of germination treatment (T, control, smoke, low heat plus smoke, and high heat plus smoke) and fire frequency (F, number of fires since 2003) on Shannon's diversity ( $H'$ ) of the germinable soil seed bank in Shrubby Dry Forest and Sub-Alpine Woodland communities. Data were standardised by the total and log(x+1) transformed prior to analysis. Significant values are indicated in bold. Fire Frequency: Shrubby Dry Forest: UB, Unburnt; S07, Single 2007; S13, Single 2013; D, Double. Sub-Alpine Woodland: UB, Unburnt; S, Single; D, Double; T, Triple.

| Source                     | df | SS       | MS     | Pseudo-F | P(perm)       | Unique Perms | Pairwise                                                                |
|----------------------------|----|----------|--------|----------|---------------|--------------|-------------------------------------------------------------------------|
| <i>Shrubby Dry Forest</i>  |    |          |        |          |               |              |                                                                         |
| Total species              |    |          |        |          |               |              |                                                                         |
| T                          | 3  | 2.998    | 0.999  | 2.0334   | 0.1131        | 9947         |                                                                         |
| F                          | 3  | 22.982   | 7.661  | 15.5860  | <b>0.0001</b> | 9951         | UB <sup>a</sup> , S07 <sup>ab</sup> , S13 <sup>b</sup> , D <sup>c</sup> |
| T x F                      | 9  | 2.198    | 0.244  | 0.4970   | 0.8677        | 9933         |                                                                         |
| Res                        | 64 | 31.456   | 0.492  |          |               |              |                                                                         |
| Total                      | 79 | 59.635   |        |          |               |              |                                                                         |
| Native species             |    |          |        |          |               |              |                                                                         |
| T                          | 3  | 2.853    | 0.951  | 1.5460   | 0.2168        | 9946         |                                                                         |
| F                          | 3  | 20.523   | 6.841  | 11.1210  | <b>0.0001</b> | 9956         | UB <sup>a</sup> , S07 <sup>b</sup> , S13 <sup>b</sup> , D <sup>c</sup>  |
| T x F                      | 9  | 2.463    | 0.274  | 0.4448   | 0.9028        | 9933         |                                                                         |
| Res                        | 64 | 39.370   | 0.615  |          |               |              |                                                                         |
| Total                      | 79 | 65.209   |        |          |               |              |                                                                         |
| Introduced species         |    |          |        |          |               |              |                                                                         |
| T                          | 3  | 37.179   | 12.393 | 0.9068   | 0.5961        | 9919         |                                                                         |
| F                          | 3  | 85.926   | 28.642 | 2.0958   | <b>0.0033</b> | 9895         | UB <sup>a</sup> , S07 <sup>b</sup> , S13 <sup>ab</sup> , D <sup>a</sup> |
| T x F                      | 9  | 89.050   | 9.894  | 0.7240   | 0.9583        | 9840         |                                                                         |
| Res                        | 64 | 874.650  | 13.666 |          |               |              |                                                                         |
| Total                      | 79 | 1086.800 |        |          |               |              |                                                                         |
| <i>Sub-Alpine Woodland</i> |    |          |        |          |               |              |                                                                         |
| Total species              |    |          |        |          |               |              |                                                                         |
| T                          | 3  | 0.046    | 0.015  | 0.0511   | 0.9874        | 9944         |                                                                         |
| F                          | 3  | 12.431   | 4.144  | 13.8550  | <b>0.0001</b> | 9941         | UB <sup>a</sup> , S <sup>b</sup> , D <sup>c</sup> , T <sup>c</sup>      |
| T x F                      | 9  | 0.359    | 0.040  | 0.1336   | 0.9988        | 9934         |                                                                         |
| Res                        | 48 | 14.356   | 0.299  |          |               |              |                                                                         |
| Total                      | 63 | 27.192   |        |          |               |              |                                                                         |
| Native species             |    |          |        |          |               |              |                                                                         |
| T                          | 3  | 0.092    | 0.031  | 0.1110   | 0.9559        | 9950         |                                                                         |
| F                          | 3  | 10.030   | 3.343  | 12.0640  | <b>0.0001</b> | 9945         | UB <sup>a</sup> , S <sup>a</sup> , D <sup>b</sup> , T <sup>b</sup>      |
| T x F                      | 9  | 0.947    | 0.105  | 0.3795   | 0.9428        | 9938         |                                                                         |
| Res                        | 48 | 13.302   | 0.277  |          |               |              |                                                                         |
| Total                      | 63 | 24.371   |        |          |               |              |                                                                         |
| Introduced species         |    |          |        |          |               |              |                                                                         |
| T                          | 3  | 29.960   | 9.987  | 0.6335   | 0.9131        | 9900         |                                                                         |
| F                          | 3  | 145.770  | 48.591 | 3.0823   | <b>0.0001</b> | 9893         | UB <sup>a</sup> , S <sup>a</sup> , D <sup>b</sup> , T <sup>c</sup>      |
| T x F                      | 9  | 85.549   | 9.505  | 0.6030   | 0.9967        | 9835         |                                                                         |
| Res                        | 48 | 756.710  | 15.765 |          |               |              |                                                                         |
| Total                      | 63 | 1018.000 |        |          |               |              |                                                                         |

**Table S6** Results of the PERMANOVA and SIMPER analysis, testing for the effect of germination treatment (T, control, smoke, low heat plus smoke, and high heat plus smoke) and fire frequency (F, number of fires since 2003) on species composition of the germinable soil seed bank in Shrubby Dry Forest and Sub-Alpine Woodland communities. Significant values are indicated in bold. Fire Frequency: Shrubby Dry Forest: UB, Unburnt; S07, Single 2007; S13, Single 2013; D, Double. Sub-Alpine Woodland: UB, Unburnt; S, Single; D, Double; and T, Triple.

| Source                     | df | SS       | MS      | Pseudo-F | P(perm)       | Unique Perms | Pairwise                                                                |
|----------------------------|----|----------|---------|----------|---------------|--------------|-------------------------------------------------------------------------|
| <i>Shrubby Dry Forest</i>  |    |          |         |          |               |              |                                                                         |
| T                          | 3  | 10255.0  | 3418.3  | 1.3213   | 0.1127        | 9887         |                                                                         |
| F                          | 3  | 29673.0  | 9891.0  | 3.8231   | <b>0.0001</b> | 9890         | UB <sup>a</sup> , S07 <sup>b</sup> , S13 <sup>ab</sup> , D <sup>c</sup> |
| T x F                      | 9  | 16596.0  | 1844.0  | 0.7127   | 0.9854        | 9824         |                                                                         |
| Res                        | 64 | 165580.0 | 2587.2  |          |               |              |                                                                         |
| Total                      | 79 | 222100.0 |         |          |               |              |                                                                         |
| <i>Sub-Alpine Woodland</i> |    |          |         |          |               |              |                                                                         |
| T                          | 3  | 4613.0   | 1537.7  | 0.6442   | 0.9445        | 9877         |                                                                         |
| F                          | 3  | 32812.0  | 10937.0 | 4.5823   | <b>0.0001</b> | 9878         | UB <sup>a</sup> , S <sup>b</sup> , D <sup>c</sup> , T <sup>d</sup>      |
| T x F                      | 9  | 8474.1   | 941.6   | 0.3945   | 1.0000        | 9804         |                                                                         |
| Res                        | 48 | 114570.0 | 2386.8  |          |               |              |                                                                         |
| Total                      | 63 | 160470.0 |         |          |               |              |                                                                         |

| Average similarity between/within groups |             |             |             |        |
|------------------------------------------|-------------|-------------|-------------|--------|
| <i>Shrubby Dry Forest</i>                |             |             |             |        |
|                                          | Unburned    | S07         | S13         | Double |
| Unburned                                 | 28.9        |             |             |        |
| S07                                      | <b>23.3</b> | 25.5        |             |        |
| S13                                      | 26.3        | 25.9        | 27.7        |        |
| Double                                   | <b>20.4</b> | <b>28.1</b> | <b>27.4</b> | 42.2   |
| <i>Sub-Alpine Woodland</i>               |             |             |             |        |
|                                          | Unburned    | Single      | Double      | Triple |
| Unburned                                 | 39.2        |             |             |        |
| Single                                   | <b>30.4</b> | 35.4        |             |        |
| Double                                   | <b>24.8</b> | <b>33.8</b> | 42.7        |        |
| Triple                                   | <b>21.7</b> | <b>28.0</b> | <b>30.1</b> | 31.3   |

Table S6 (cont.)

## SIMPER—Shrubby Dry Forest

**Groups S13 and Double**

Average dissimilarity = 85.32

| Species                                           | S13<br>Av.Abund | Double<br>Av.Abund | Av.Diss | Diss/SD | Contrib% | Cum.% |
|---------------------------------------------------|-----------------|--------------------|---------|---------|----------|-------|
| <i>Laphangium luteoalbum</i>                      | 1.2             | 1.5                | 12.8    | 1.0     | 15.0     | 15.0  |
| <i>Wahlenbergia stricta</i> subsp. <i>stricta</i> | 1.2             | 0.0                | 5.9     | 0.8     | 6.9      | 21.9  |
| <i>Wahlenbergia gracilis</i>                      | 0.7             | 0.2                | 5.2     | 0.8     | 6.1      | 28.0  |
| <i>Daviesia buxifolia</i>                         | 0.3             | 0.5                | 4.4     | 0.8     | 5.1      | 33.1  |
| <i>Poranthera microphylla</i>                     | 0.5             | 0.2                | 4.1     | 0.9     | 4.8      | 37.9  |
| <i>Poa sieberiana</i> var. <i>sieberiana</i>      | 0.7             | 0.0                | 3.3     | 0.7     | 3.8      | 41.7  |
| <i>Cassinia longifolia</i>                        | 0.6             | 0.0                | 3.3     | 0.9     | 3.8      | 45.6  |
| <i>Erigeron</i> spp.                              | 0.3             | 0.1                | 2.9     | 0.6     | 3.4      | 49.0  |
| <i>Galium binifolium</i> subsp. <i>conforme</i>   | 0.5             | 0.0                | 2.7     | 0.7     | 3.2      | 52.1  |

**Groups Double and S07**

Average dissimilarity = 83.27

| Species                                           | S07<br>Av.Abund | Double<br>Av.Abund | Av.Diss | Diss/SD | Contrib% | Cum.% |
|---------------------------------------------------|-----------------|--------------------|---------|---------|----------|-------|
| <i>Laphangium luteoalbum</i>                      | 1.2             | 1.5                | 12.4    | 1.0     | 14.9     | 14.9  |
| <i>Daviesia buxifolia</i>                         | 0.5             | 0.5                | 6.1     | 0.7     | 7.3      | 22.2  |
| <i>Cassinia longifolia</i>                        | 0.9             | 0.0                | 4.1     | 0.7     | 4.9      | 27.1  |
| <i>Poranthera microphylla</i>                     | 0.7             | 0.2                | 3.7     | 0.8     | 4.4      | 31.5  |
| <i>Wahlenbergia gracilis</i>                      | 0.8             | 0.2                | 3.3     | 0.8     | 4.0      | 35.6  |
| <i>Wahlenbergia stricta</i> subsp. <i>stricta</i> | 0.7             | 0.0                | 3.2     | 0.6     | 3.8      | 39.3  |
| <i>Erigeron sumatrensis</i>                       | 0.2             | 0.1                | 2.7     | 0.5     | 3.2      | 42.6  |
| <i>Pelargonium littorale</i>                      | 0.8             | 0.0                | 2.6     | 0.5     | 3.1      | 45.7  |
| <i>Goodenia ovata</i>                             | 0.4             | 0.2                | 2.6     | 0.7     | 3.1      | 48.8  |
| <i>Billardiera mutabilis</i>                      | 0.3             | 0.0                | 2.5     | 0.6     | 3.0      | 51.7  |

**Groups Double and Unburned**

Average dissimilarity = 88.79

| Species                                           | UB<br>Av.Aund | Double<br>Av.Abund | Av.Diss | Diss/SD | Contrib% | Cum.% |
|---------------------------------------------------|---------------|--------------------|---------|---------|----------|-------|
| <i>Wahlenbergia stricta</i> subsp. <i>stricta</i> | 1.5           | 0.0                | 7.8     | 0.8     | 8.8      | 8.8   |
| <i>Laphangium luteoalbum</i>                      | 1.0           | 1.5                | 7.6     | 1.1     | 8.6      | 17.4  |
| <i>Poranthera microphylla</i>                     | 1.2           | 0.2                | 5.9     | 1.3     | 6.7      | 24.1  |
| <i>Stypandra glauca</i>                           | 1.1           | 0.0                | 5.4     | 0.8     | 6.1      | 30.2  |
| <i>Cassinia longifolia</i>                        | 0.9           | 0.0                | 4.2     | 0.7     | 4.7      | 34.9  |
| <i>Galium binifolium</i> subsp. <i>conforme</i>   | 1.0           | 0.0                | 3.6     | 0.8     | 4.0      | 38.9  |
| <i>Wahlenbergia gracilis</i>                      | 0.8           | 0.2                | 3.4     | 0.8     | 3.8      | 42.7  |
| <i>Goodenia ovata</i>                             | 0.4           | 0.2                | 3.3     | 0.6     | 3.8      | 46.5  |
| <i>Daviesia buxifolia</i>                         | 0.2           | 0.5                | 2.9     | 0.8     | 3.3      | 49.8  |
| <i>Cerastium vulgare</i>                          | 0.4           | 0.0                | 2.7     | 0.6     | 3.1      | 52.8  |

**Groups S07 and Unburned**

Average dissimilarity = 83.15

| Species | UB<br>Av.Abund | S07<br>Av.Abund | Av.Diss | Diss/SD | Contrib% | Cum.% |
|---------|----------------|-----------------|---------|---------|----------|-------|
|---------|----------------|-----------------|---------|---------|----------|-------|



| SIMPER—Shrubby Dry Forest                         |     |     |     |     |     |      |
|---------------------------------------------------|-----|-----|-----|-----|-----|------|
| <i>Wahlenbergia stricta</i> subsp. <i>stricta</i> | 1.5 | 0.7 | 5.7 | 0.9 | 6.9 | 6.9  |
| <i>Laphangium luteoalbum</i>                      | 1.0 | 1.2 | 5.4 | 1.0 | 6.5 | 13.4 |
| <i>Poranthera microphylla</i>                     | 1.2 | 0.7 | 4.0 | 1.1 | 4.9 | 18.3 |
| <i>Cassinia longifolia</i>                        | 0.9 | 0.9 | 4.0 | 0.9 | 4.8 | 23.1 |
| <i>Stypandra glauca</i>                           | 1.1 | 0.0 | 4.0 | 0.7 | 4.8 | 27.9 |
| <i>Wahlenbergia gracilis</i>                      | 0.8 | 0.8 | 3.2 | 1.0 | 3.8 | 31.7 |
| <i>Galium binifolium</i> subsp. <i>conforme</i>   | 1.0 | 0.1 | 2.9 | 0.8 | 3.5 | 35.2 |
| <i>Goodenia ovata</i>                             | 0.4 | 0.4 | 2.6 | 0.6 | 3.1 | 38.3 |
| <i>Daviesia buxifolia</i>                         | 0.2 | 0.5 | 2.6 | 0.6 | 3.1 | 41.4 |
| <i>Cerastium vulgare</i>                          | 0.4 | 0.0 | 1.9 | 0.6 | 2.3 | 43.7 |
| <i>Pelargonium littorale</i>                      | 0.1 | 0.8 | 1.9 | 0.5 | 2.3 | 45.9 |
| <i>Centaureum erythraea</i>                       | 0.6 | 0.5 | 1.8 | 0.7 | 2.2 | 48.1 |
| <i>Wahlenbergia</i> spp.                          | 0.3 | 0.6 | 1.8 | 0.7 | 2.2 | 50.3 |

| SIMPER—Sub-Alpine Woodland                        |          |          |         |         |          |       |
|---------------------------------------------------|----------|----------|---------|---------|----------|-------|
| Groups Unburned and Double                        |          |          |         |         |          |       |
| Average dissimilarity = 75.19                     | UB       | Double   |         |         |          |       |
| Species                                           | Av.Abund | Av.Abund | Av.Diss | Diss/SD | Contrib% | Cum.% |
| <i>Carex breviculmis</i>                          | 2.4      | 0.7      | 7.0     | 1.5     | 9.3      | 9.3   |
| <i>Luzula meridionalis</i> subsp. <i>flaccida</i> | 1.9      | 0.7      | 6.2     | 1.6     | 8.2      | 17.5  |
| <i>Poa hothamensis</i> var. <i>hothamensis</i>    | 1.9      | 2.7      | 5.7     | 1.5     | 7.5      | 25.0  |
| <i>Acetocella vulgaris</i>                        | 1.3      | 0.3      | 4.8     | 1.2     | 6.4      | 31.4  |
| <i>Oreomyrrhis eriopoda</i>                       | 0.7      | 1.0      | 4.5     | 1.3     | 6.0      | 37.4  |
| <i>Hydrocotyle sibthorpioides</i>                 | 0.9      | 0.0      | 3.4     | 0.6     | 4.6      | 41.9  |
| <i>Leptinella filicula</i>                        | 1.0      | 0.4      | 3.4     | 1.2     | 4.5      | 46.4  |
| <i>Hypochaeris radicata</i>                       | 0.9      | 0.0      | 3.4     | 1.2     | 4.5      | 50.9  |
| Groups Unburned and Single                        |          |          |         |         |          |       |
| Average dissimilarity = 69.62                     | UB       | Single   |         |         |          |       |
| Species                                           | Av.Abund | Av.Abund | Av.Diss | Diss/SD | Contrib% | Cum.% |
| <i>Carex breviculmis</i>                          | 2.4      | 1.1      | 5.3     | 1.5     | 7.6      | 7.6   |
| <i>Luzula meridionalis</i> subsp. <i>flaccida</i> | 1.9      | 0.5      | 4.7     | 1.6     | 6.8      | 14.4  |
| <i>Poa hothamensis</i> var. <i>hothamensis</i>    | 1.9      | 2.0      | 4.3     | 1.5     | 6.1      | 20.5  |
| <i>Acetocella vulgaris</i>                        | 1.3      | 1.0      | 4.1     | 1.3     | 5.9      | 26.4  |
| <i>Gonocarpus montanus</i>                        | 0.7      | 0.9      | 3.2     | 1.1     | 4.6      | 30.9  |
| <i>Oreomyrrhis eriopoda</i>                       | 0.7      | 0.7      | 3.0     | 1.3     | 4.4      | 35.3  |
| <i>Hydrocotyle sibthorpioides</i>                 | 0.9      | 0.0      | 3.0     | 0.6     | 4.3      | 39.6  |
| <i>Hypochaeris radicata</i>                       | 0.9      | 1.0      | 2.9     | 1.3     | 4.2      | 43.7  |
| <i>Leptinella filicula</i>                        | 1.0      | 0.3      | 2.9     | 1.2     | 4.1      | 47.8  |
| <i>Geranium</i> spp.                              | 0.7      | 0.0      | 2.3     | 1.2     | 3.3      | 51.1  |
| Groups Double and Single                          |          |          |         |         |          |       |
| Average dissimilarity = 66.22                     | Single   | Double   |         |         |          |       |
| Species                                           | Av.Abund | Av.Abund | Av.Diss | Diss/SD | Contrib% | Cum.% |

|                                                   |          |          |         |         |          |       |
|---------------------------------------------------|----------|----------|---------|---------|----------|-------|
| <b>SIMPER—Sub-Alpine Woodland</b>                 |          |          |         |         |          |       |
| <i>Poa hothamensis</i> var. <i>hothamensis</i>    | 2.0      | 2.7      | 5.4     | 1.3     | 8.1      | 8.1   |
| <i>Oreomyrrhis eriopoda</i>                       | 0.7      | 1.0      | 5.3     | 0.8     | 8.0      | 16.1  |
| <i>Gonocarpus montanus</i>                        | 0.9      | 0.6      | 5.2     | 1.0     | 7.9      | 24.0  |
| <i>Carex breviculmis</i>                          | 1.1      | 0.7      | 4.7     | 1.3     | 7.1      | 31.0  |
| <i>Acetocella vulgaris</i>                        | 1.0      | 0.3      | 4.6     | 1.0     | 6.9      | 37.9  |
| <i>Hypochaeris radicata</i>                       | 1.0      | 0.0      | 4.4     | 1.1     | 6.7      | 44.6  |
| <i>Luzula meridionalis</i> subsp. <i>flaccida</i> | 0.5      | 0.7      | 4.0     | 1.1     | 6.0      | 50.6  |
| <b>Groups Unburned and Triple</b>                 |          |          |         |         |          |       |
| Average dissimilarity = 78.29                     | UB       | Triple   |         |         |          |       |
| Species                                           | Av.Abund | Av.Abund | Av.Diss | Diss/SD | Contrib% | Cum.% |
| <i>Carex breviculmis</i>                          | 2.4      | 0.4      | 7.4     | 1.6     | 9.5      | 9.5   |
| <i>Luzula meridionalis</i> subsp. <i>flaccida</i> | 1.9      | 0.1      | 6.9     | 2.0     | 8.8      | 18.2  |
| <i>Poa hothamensis</i> var. <i>hothamensis</i>    | 1.9      | 1.8      | 5.0     | 1.4     | 6.4      | 24.7  |
| <i>Acetocella vulgaris</i>                        | 1.3      | 1.1      | 4.2     | 1.3     | 5.4      | 30.1  |
| <i>Hydrocotyle sibthorpioides</i>                 | 0.9      | 0.0      | 3.4     | 0.6     | 4.4      | 34.4  |
| <i>Leptinella filicula</i>                        | 1.0      | 0.1      | 3.3     | 1.2     | 4.2      | 38.6  |
| <i>Hypochaeris radicata</i>                       | 0.9      | 0.4      | 3.2     | 1.2     | 4.1      | 42.8  |
| <i>Wahlenbergia multicaulis</i>                   | 0.0      | 0.8      | 3.0     | 0.6     | 3.9      | 46.6  |
| <i>Oreomyrrhis eriopoda</i>                       | 0.7      | 0.0      | 2.7     | 1.2     | 3.5      | 50.1  |
| <b>Groups Double and Triple</b>                   |          |          |         |         |          |       |
| Average dissimilarity = 69.86                     | Double   | Triple   |         |         |          |       |
| Species                                           | Av.Abund | Av.Abund | Av.Diss | Diss/SD | Contrib% | Cum.% |
| <i>Poa hothamensis</i> var. <i>hothamensis</i>    | 2.7      | 1.8      | 8.3     | 1.2     | 11.9     | 11.9  |
| <i>Acetocella vulgaris</i>                        | 0.3      | 1.1      | 6.6     | 1.1     | 9.5      | 21.4  |
| <i>Wahlenbergia multicaulis</i>                   | 0.0      | 0.8      | 5.7     | 0.5     | 8.2      | 29.6  |
| <i>Gonocarpus montanus</i>                        | 0.6      | 0.3      | 4.6     | 0.9     | 6.6      | 36.2  |
| <i>Oreomyrrhis eriopoda</i>                       | 1.0      | 0.0      | 4.5     | 0.6     | 6.4      | 42.6  |
| <i>Carex breviculmis</i>                          | 0.7      | 0.4      | 3.8     | 1.2     | 5.4      | 47.9  |
| <i>Luzula meridionalis</i> subsp. <i>flaccida</i> | 0.7      | 0.1      | 3.3     | 0.7     | 4.7      | 52.7  |
| <b>Groups Single and Triple</b>                   |          |          |         |         |          |       |
| Average dissimilarity = 72.01                     | Single   | Triple   |         |         |          |       |
| Species                                           | Av.Abund | Av.Abund | Av.Diss | Diss/SD | Contrib% | Cum.% |
| <i>Acetocella vulgaris</i>                        | 1.0      | 1.1      | 5.8     | 1.3     | 8.1      | 8.1   |
| <i>Gonocarpus montanus</i>                        | 0.9      | 0.3      | 5.1     | 1.0     | 7.1      | 15.2  |
| <i>Poa hothamensis</i> var. <i>hothamensis</i>    | 2.0      | 1.8      | 4.9     | 1.2     | 6.9      | 22.1  |
| <i>Carex breviculmis</i>                          | 1.1      | 0.4      | 4.8     | 1.4     | 6.7      | 28.7  |
| <i>Hypochaeris radicata</i>                       | 1.0      | 0.4      | 4.4     | 1.2     | 6.1      | 34.9  |
| <i>Wahlenbergia multicaulis</i>                   | 0.0      | 0.8      | 4.3     | 0.6     | 5.9      | 40.8  |
| <i>Oreomyrrhis eriopoda</i>                       | 0.7      | 0.0      | 2.9     | 0.6     | 4.0      | 44.8  |
| <i>Luzula meridionalis</i> subsp. <i>flaccida</i> | 0.5      | 0.1      | 2.6     | 0.9     | 3.6      | 48.3  |
| <i>Podolobium alpestre</i>                        | 0.5      | 0.1      | 2.5     | 0.8     | 3.4      | 51.7  |

**Table S7** Results of the PERMANOVA, testing for the effect of vegetation type (V: Veg, extant vegetation; SSB, soil seed bank) and fire frequency (F, number of fires since 2003) on species richness in Shrubby Dry Forest and Sub-Alpine Woodland communities. Significant values are indicated in bold. Fire Frequency: Shrubby Dry Forest: UB, Unburnt; S07, Single 2007; S13, Single 2013; D, Double. Sub-Alpine Woodland: UB, Unburnt; S, Single; D, Double; and T, Triple.

|                            | Source | df | SS       | MS       | Pseudo-F | P(perm)       | Unique Perms | Pairwise                                                               |
|----------------------------|--------|----|----------|----------|----------|---------------|--------------|------------------------------------------------------------------------|
| <i>Shrubby Dry Forest</i>  |        |    |          |          |          |               |              |                                                                        |
| All Species                | V      | 1  | 102.400  | 102.400  | 1.4400   | 0.2388        | 9796         |                                                                        |
|                            | F      | 3  | 1263.800 | 421.270  | 5.9239   | <b>0.0030</b> | 9940         | UB <sup>a</sup> , S07 <sup>a</sup> , S13 <sup>a</sup> , D <sup>b</sup> |
|                            | V x F  | 3  | 40.200   | 13.400   | 0.1884   | 0.9071        | 9953         |                                                                        |
|                            | Res    | 32 | 2275.600 | 71.113   |          |               |              |                                                                        |
|                            | Total  | 39 | 3682.000 |          |          |               |              |                                                                        |
| Native Species             | V      | 1  | 378.230  | 378.230  | 6.0107   | <b>0.0208</b> | 9834         | Veg <sup>a</sup> , SSB <sup>b</sup>                                    |
|                            | F      | 3  | 1038.900 | 346.290  | 5.5032   | <b>0.0044</b> | 9949         | UB <sup>a</sup> , S07 <sup>a</sup> , S13 <sup>a</sup> , D <sup>b</sup> |
|                            | V x F  | 3  | 31.275   | 10.425   | 0.1657   | 0.9222        | 9950         |                                                                        |
|                            | Res    | 32 | 2013.600 | 62.925   |          |               |              |                                                                        |
|                            | Total  | 39 | 3462.000 |          |          |               |              |                                                                        |
| Introduced Species         | V      | 1  | 55.225   | 55.225   | 33.7250  | <b>0.0001</b> | 9757         | Veg <sup>a</sup> , SSB <sup>b</sup>                                    |
|                            | F      | 3  | 7.075    | 2.358    | 1.4402   | 0.2501        | 9950         |                                                                        |
|                            | V x F  | 3  | 6.275    | 2.092    | 1.2774   | 0.2943        | 9958         |                                                                        |
|                            | Res    | 32 | 52.400   | 1.638    |          |               |              |                                                                        |
|                            | Total  | 39 | 120.980  |          |          |               |              |                                                                        |
| <i>Sub-Alpine Woodland</i> |        |    |          |          |          |               |              |                                                                        |
| All Species                | Source | df | SS       | MS       | Pseudo-F | P(perm)       | perms        |                                                                        |
|                            | V      | 1  | 1200.500 | 1200.500 | 20.7650  | <b>0.0002</b> | 9766         | Veg <sup>a</sup> , SSB <sup>b</sup>                                    |
|                            | F      | 3  | 1001.800 | 333.920  | 5.7759   | <b>0.0042</b> | 9950         | UB <sup>b</sup> , S <sup>ab</sup> , D13 <sup>a</sup> , T <sup>a</sup>  |
|                            | V x F  | 3  | 121.750  | 40.583   | 0.7020   | 0.5574        | 9954         |                                                                        |
|                            | Res    | 24 | 1387.500 |          |          |               |              |                                                                        |
| Native Species             | Total  | 31 | 3711.500 |          |          |               |              |                                                                        |
|                            | V      | 1  | 1313.300 | 1313.300 | 33.4510  | <b>0.0001</b> | 9815         | Veg <sup>a</sup> , SSB <sup>b</sup>                                    |
|                            | F      | 3  | 480.340  | 160.110  | 4.0783   | <b>0.0192</b> | 9946         | UB <sup>b</sup> , S <sup>ab</sup> , D13 <sup>a</sup> , T <sup>a</sup>  |
|                            | V x F  | 3  | 49.594   | 16.531   | 0.4211   | 0.7411        | 9954         |                                                                        |
|                            | Res    | 24 | 942.250  | 39.260   |          |               |              |                                                                        |
| Introduced Species         | Total  | 31 | 2785.500 |          |          |               |              |                                                                        |
|                            | V      | 1  | 0.031    | 0.031    | 0.0069   | 0.9316        | 9744         |                                                                        |
|                            | F      | 3  | 105.340  | 35.115   | 7.7494   | <b>0.0005</b> | 9945         | UB <sup>c</sup> , S <sup>b</sup> , D13 <sup>a</sup> , T <sup>bc</sup>  |
|                            | V x F  | 3  | 13.094   | 4.365    | 0.9632   | 0.4299        | 9951         |                                                                        |
|                            | Res    | 24 | 108.750  | 4.531    |          |               |              |                                                                        |
|                            | Total  | 31 | 227.22   |          |          |               |              |                                                                        |

**Table S8** Results of the PERMANOVA, testing for the effect of fire frequency (F, number of fires since 2003) on  $H'$  in Shrubby Dry Forest and Sub-Alpine Woodland communities. Significant values are indicated in bold. Fire Frequency: Shrubby Dry Forest: UB, Unburnt; S07, Single 2007; S13, Single 2013; D, Double. Sub-Alpine Woodland: UB, Unburnt; S, Single; D, Double; and T, Triple.

| Source                     | df | SS    | MS    | Pseudo-F | P(perm)       | Unique<br>Perms | Pairwise                                                            | Source                     | df | SS     | MS      | Pseudo-F | P(perm)       | Unique<br>Perms | Pairwise                                                                |
|----------------------------|----|-------|-------|----------|---------------|-----------------|---------------------------------------------------------------------|----------------------------|----|--------|---------|----------|---------------|-----------------|-------------------------------------------------------------------------|
| <b>Extant Vegetation</b>   |    |       |       |          |               |                 |                                                                     | <b>Soil Seed Bank</b>      |    |        |         |          |               |                 |                                                                         |
| <i>Shrubby Dry Forest</i>  |    |       |       |          |               |                 |                                                                     | <i>Shrubby Dry Forest</i>  |    |        |         |          |               |                 |                                                                         |
| All species                |    |       |       |          |               |                 |                                                                     | All species                |    |        |         |          |               |                 |                                                                         |
| F                          | 3  | 0.198 | 0.066 | 2.3095   | 0.1196        | 9967            |                                                                     | F                          | 3  | 3.6009 | 1.2003  | 5.1358   | <b>0.0096</b> | 9955            | UB <sup>a</sup> , S07 <sup>ab</sup> , S13 <sup>a</sup> , D <sup>b</sup> |
| Res                        | 16 | 0.458 | 0.029 |          |               |                 |                                                                     | Res                        | 16 | 3.7394 | 0.23371 |          |               |                 |                                                                         |
| Total                      | 19 | 0.656 |       |          |               |                 |                                                                     | Total                      | 19 | 7.3402 |         |          |               |                 |                                                                         |
| Native species             |    |       |       |          |               |                 |                                                                     | Native species             |    |        |         |          |               |                 |                                                                         |
| F                          | 3  | 0.197 | 0.066 | 2.3069   | 0.1170        | 9968            |                                                                     | F                          | 3  | 3.1953 | 1.0651  | 3.2458   | 0.055         | 9962            |                                                                         |
| Res                        | 16 | 0.456 | 0.028 |          |               |                 |                                                                     | Res                        | 16 | 5.2503 | 0.32815 |          |               |                 |                                                                         |
| Total                      | 19 | 0.653 |       |          |               |                 |                                                                     | Total                      | 19 | 8.4457 |         |          |               |                 |                                                                         |
| Introduced species         |    |       |       |          |               |                 |                                                                     | Introduced species         |    |        |         |          |               |                 |                                                                         |
| F                          | 3  |       |       |          |               |                 |                                                                     | F                          | 3  | 1.1747 | 0.39158 | 1.0614   | 0.3843        | 9817            |                                                                         |
| Res                        |    |       |       |          |               |                 |                                                                     | Res                        | 16 | 5.9027 | 0.36892 |          |               |                 |                                                                         |
| Total                      |    |       |       |          |               |                 |                                                                     | Total                      | 19 | 7.0775 |         |          |               |                 |                                                                         |
| <i>Sub-Alpine Woodland</i> |    |       |       |          |               |                 |                                                                     | <i>Sub-Alpine Woodland</i> |    |        |         |          |               |                 |                                                                         |
| All species                |    |       |       |          |               |                 |                                                                     | All species                |    |        |         |          |               |                 |                                                                         |
| F                          | 3  | 0.482 | 0.161 | 4.6125   | <b>0.0245</b> | 9941            | UB <sup>a</sup> , Sa <sup>b</sup> , D <sup>b</sup> , T <sup>b</sup> | F                          | 3  | 3.1456 | 1.0485  | 3.7715   | <b>0.0272</b> | 9932            | UB <sup>a</sup> , S <sup>a</sup> , D <sup>b</sup> , T <sup>ab</sup>     |
| Res                        | 12 | 0.418 | 0.035 |          |               |                 |                                                                     | Res                        | 12 | 3.3362 | 0.27802 |          |               |                 |                                                                         |
| Total                      | 15 | 0.899 |       |          |               |                 |                                                                     | Total                      | 15 | 6.4818 |         |          |               |                 |                                                                         |
| Native species             |    |       |       |          |               |                 |                                                                     | Native species             |    |        |         |          |               |                 |                                                                         |
| F                          | 3  | 0.521 | 0.174 | 4.5396   | <b>0.0232</b> | 9924            | UB <sup>a</sup> , S <sup>a</sup> , D <sup>b</sup> , T <sup>b</sup>  | F                          | 3  | 3.0297 | 1.0099  | 3.7582   | <b>0.0291</b> | 9944            | UB <sup>a</sup> , S <sup>a</sup> , D <sup>b</sup> , T <sup>ab</sup>     |
| Res                        | 12 | 0.459 | 0.038 |          |               |                 |                                                                     | Res                        | 12 | 3.2247 | 0.26872 |          |               |                 |                                                                         |
| Total                      | 15 | 0.981 |       |          |               |                 |                                                                     | Total                      | 15 | 6.2544 |         |          |               |                 |                                                                         |
| Introduced species         |    |       |       |          |               |                 |                                                                     | Introduced species         |    |        |         |          |               |                 |                                                                         |
| F                          | 3  | 0.543 | 0.181 | 1.9105   | 0.1828        | 9056            |                                                                     | F                          | 3  | 2.9749 | 0.99162 | 3.261    | 0.0682        | 9736            |                                                                         |
| Res                        | 12 | 1.136 | 0.095 |          |               |                 |                                                                     | Res                        | 12 | 3.649  | 0.30408 |          |               |                 |                                                                         |
| Total                      | 15 | 1.679 |       |          |               |                 |                                                                     | Total                      | 15 | 6.6239 |         |          |               |                 |                                                                         |

**Table S9** Results of the PERMANOVA and SIMPER analysis, testing for the effect of vegetation type (V; Veg, Extant Vegetation; SSB, Soil Seed Bank) and fire frequency (F, number of fires since 2003) on species composition Shrubby Dry Forest and Sub-Alpine Woodland communities. Significant values are indicated in bold. Fire Frequency: Shrubby Dry Forest: UB, Unburnt; S07, Single 2007; S13, Single 2013; D, Double. Sub-Alpine Woodland: UB, Unburnt; S, Single; D, Double; and T, Triple.

| Source                     | df | SS       | MS     | Pseudo-F | P(perm)       | Unique Perms | Pairwise                                                                |
|----------------------------|----|----------|--------|----------|---------------|--------------|-------------------------------------------------------------------------|
| <i>Shrubby Dry Forest</i>  |    |          |        |          |               |              |                                                                         |
| V                          | 1  | 26802    | 26802  | 12.589   | <b>0.0001</b> | 9922         | Veg <sup>a</sup> , SSB <sup>b</sup>                                     |
| F                          | 3  | 17159    | 5719.6 | 2.6864   | <b>0.0001</b> | 9903         | UB <sup>a</sup> , S07 <sup>ab</sup> , S13 <sup>a</sup> , D <sup>b</sup> |
| V x F                      | 3  | 6177     | 2059   | 0.96709  | 0.5164        | 9878         |                                                                         |
| Res                        | 32 | 68131    | 2129.1 |          |               |              |                                                                         |
| Total                      | 39 | 1.18E+05 |        |          |               |              |                                                                         |
| <i>Sub-Alpine Woodland</i> |    |          |        |          |               |              |                                                                         |
| V                          | 1  | 14923    | 14923  | 8.0416   | <b>0.0001</b> | 9922         | Veg <sup>a</sup> , SSB <sup>b</sup>                                     |
| F                          | 3  | 11341    | 3780.3 | 2.037    | <b>0.0005</b> | 9879         | UB <sup>a</sup> , S <sup>ab</sup> , D13 <sup>b</sup> , T <sup>c</sup>   |
| V x F                      | 3  | 6243.1   | 2081   | 1.1214   | 0.2768        | 9857         |                                                                         |
| Res                        | 24 | 44538    | 1855.8 |          |               |              |                                                                         |
| Total                      | 31 | 77045    |        |          |               |              |                                                                         |

| Average similarity between/within groups |             |             |             |        |  |
|------------------------------------------|-------------|-------------|-------------|--------|--|
| <i>Shrubby Dry Forest</i>                |             |             |             |        |  |
| Vegetation Type                          |             |             |             |        |  |
|                                          | Veg         | SSB         |             |        |  |
| Veg                                      | 34.0        |             |             |        |  |
| SSB                                      | <b>15.5</b> | 30.1        |             |        |  |
| Fire Frequency                           |             |             |             |        |  |
|                                          | Unburned    | S07         | S13         | Double |  |
| Unburned                                 | 28.7        |             |             |        |  |
| S07                                      | 24.2        | 23.2        |             |        |  |
| S13                                      | 27.7        | 24.1        | 27.4        |        |  |
| Double                                   | <b>17.1</b> | 22.4        | <b>20.1</b> | 27.5   |  |
| <i>Sub-Alpine Woodland</i>               |             |             |             |        |  |
| Vegetation Type                          |             |             |             |        |  |
|                                          | Veg         | SSB         |             |        |  |
| Veg                                      | 37.3        |             |             |        |  |
| SSB                                      | <b>25.0</b> | 36.4        |             |        |  |
| Fire Frequency                           |             |             |             |        |  |
|                                          | Unburned    | Single      | Double      | Triple |  |
| Unburned                                 | 39.5        |             |             |        |  |
| Single                                   | 33.1        | 29.3        |             |        |  |
| Double                                   | <b>27.5</b> | 30.6        | 30.2        |        |  |
| Triple                                   | <b>32.4</b> | <b>28.7</b> | <b>28.6</b> | 31.7   |  |

---

SIMPER—Shrubby Dry Forest

---

**Groups Veg and SSB**

Average dissimilarity = 84.50

| Species                                              | Veg<br>Av.Abund | SSB<br>Av.Abund | Av.Diss | Diss/SD | Contrib% | Cum.% |
|------------------------------------------------------|-----------------|-----------------|---------|---------|----------|-------|
| <i>Laphangium luteoalbum</i>                         | 0.0             | 1.0             | 3.0     | 2.5     | 3.6      | 3.6   |
| <i>Acacia pycnantha</i>                              | 0.8             | 0.1             | 2.3     | 1.3     | 2.8      | 6.3   |
| <i>Eucalyptus sieberi</i>                            | 0.7             | 0.1             | 2.1     | 1.2     | 2.5      | 8.8   |
| <i>Eucalyptus muelleriana</i>                        | 0.8             | 0.1             | 2.0     | 1.3     | 2.4      | 11.2  |
| <i>Wahlenbergia</i> spp.                             | 0.3             | 0.8             | 1.8     | 1.2     | 2.2      | 13.4  |
| <i>Lomandra filiformis</i> subsp. <i>filiformis</i>  | 0.7             | 0.1             | 1.8     | 1.2     | 2.1      | 15.5  |
| <i>Hibbertia obtusifolia</i>                         | 0.6             | 0.1             | 1.7     | 1.0     | 2.0      | 17.6  |
| <i>Erigeron</i> sp                                   | 0.1             | 0.7             | 1.7     | 1.1     | 2.0      | 19.5  |
| <i>Eucalyptus polyanthemus</i> subsp. <i>vestita</i> | 0.6             | 0.0             | 1.6     | 1.1     | 1.9      | 21.5  |
| <i>Poa sieberiana</i> var. <i>sieberiana</i>         | 0.8             | 0.5             | 1.6     | 0.9     | 1.9      | 23.4  |
| <i>Billardiera mutabilis</i>                         | 0.7             | 0.4             | 1.6     | 1.0     | 1.9      | 25.3  |
| <i>Poranthera microphylla</i>                        | 0.2             | 0.7             | 1.6     | 1.1     | 1.9      | 27.2  |
| <i>Stypandra glauca</i>                              | 0.6             | 0.4             | 1.5     | 1.0     | 1.8      | 29.0  |
| <i>Cassinia longifolia</i>                           | 0.7             | 0.6             | 1.5     | 0.9     | 1.8      | 30.8  |
| <i>Dianella revoluta</i> var. <i>revoluta</i>        | 0.5             | 0.0             | 1.5     | 0.8     | 1.8      | 32.6  |
| <i>Daviesia buxifolia</i>                            | 0.6             | 0.6             | 1.4     | 0.9     | 1.6      | 34.2  |
| <i>Eucalyptus macroryncha</i>                        | 0.4             | 0.1             | 1.3     | 0.7     | 1.6      | 35.7  |
| <i>Gahnia microstachya</i>                           | 0.4             | 0.1             | 1.3     | 0.7     | 1.5      | 37.3  |
| <i>Galium</i> spp.                                   | 0.2             | 0.5             | 1.2     | 0.9     | 1.4      | 38.7  |
| <i>Lepidosperma</i> spp.                             | 0.4             | 0.1             | 1.2     | 0.8     | 1.4      | 40.1  |
| <i>Gamochaeta calviceps</i>                          | 0.0             | 0.4             | 1.1     | 0.7     | 1.3      | 41.3  |
| <i>Deyeuxia quadriseta</i>                           | 0.3             | 0.4             | 1.1     | 0.9     | 1.3      | 42.6  |
| <i>Goodenia ovata</i>                                | 0.2             | 0.3             | 1.1     | 0.7     | 1.3      | 43.9  |
| <i>Gamochaeta americana purpurea</i>                 | 0.0             | 0.4             | 1.0     | 0.7     | 1.2      | 45.1  |
| <i>Microleana stipoides</i> var. <i>stipoides</i>    | 0.3             | 0.3             | 1.0     | 0.8     | 1.2      | 46.3  |
| <i>Erigeron sumatrensis</i>                          | 0.0             | 0.4             | 1.0     | 0.7     | 1.2      | 47.5  |
| <i>Veronica perfoliata</i>                           | 0.2             | 0.2             | 1.0     | 0.6     | 1.2      | 48.7  |
| <i>Eucalyptus tricarpa</i>                           | 0.3             | 0.0             | 1.0     | 0.6     | 1.2      | 49.9  |
| <i>Rhytidosporum procumbens</i>                      | 0.2             | 0.2             | 1.0     | 0.6     | 1.2      | 51.0  |

**Groups S13 and Double**

Average dissimilarity = 79.91

| Species                                      | S13<br>Av.Abund | Double<br>Av.Abund | Av.Diss | Diss/SD | Contrib% | Cum.% |
|----------------------------------------------|-----------------|--------------------|---------|---------|----------|-------|
| <i>Stypandra glauca</i>                      | 0.8             | 0.1                | 2.7     | 1.4     | 3.4      | 3.4   |
| <i>Wahlenbergia</i> spp.                     | 0.8             | 0.2                | 2.4     | 1.3     | 3.0      | 6.4   |
| <i>Daviesia buxifolia</i>                    | 0.5             | 1.0                | 2.0     | 0.9     | 2.5      | 8.9   |
| <i>Poa sieberiana</i> var. <i>sieberiana</i> | 0.7             | 0.3                | 1.9     | 1.1     | 2.4      | 11.4  |
| <i>Erigeron</i> sp                           | 0.5             | 0.2                | 1.8     | 0.9     | 2.3      | 13.6  |
| <i>Cassinia longifolia</i>                   | 0.6             | 0.5                | 1.8     | 0.9     | 2.2      | 15.8  |
| <i>Acacia pycnantha</i>                      | 0.5             | 0.5                | 1.7     | 1.0     | 2.2      | 18.0  |
| <i>Laphangium luteoalbum</i>                 | 0.5             | 0.5                | 1.7     | 1.0     | 2.2      | 20.2  |
| <i>Eucalyptus sieberi</i>                    | 0.5             | 0.3                | 1.7     | 0.9     | 2.1      | 22.3  |

---

SIMPER—Shrubby Dry Forest

|                                                     |     |     |     |     |     |      |
|-----------------------------------------------------|-----|-----|-----|-----|-----|------|
| <i>Eucalyptus muelleriana</i>                       | 0.5 | 0.3 | 1.7 | 1.0 | 2.1 | 24.4 |
| <i>Hibbertia obtusifolia</i>                        | 0.4 | 0.4 | 1.7 | 0.9 | 2.1 | 26.4 |
| <i>Lomandra filiformis</i> subsp. <i>filiformis</i> | 0.5 | 0.1 | 1.6 | 1.0 | 2.0 | 28.5 |
| <i>Veronica perfoliata</i>                          | 0.3 | 0.4 | 1.6 | 0.9 | 2.0 | 30.5 |
| <i>Galium</i> spp.                                  | 0.5 | 0.1 | 1.6 | 0.9 | 2.0 | 32.5 |
| <i>Poranthera microphylla</i>                       | 0.4 | 0.2 | 1.5 | 0.8 | 1.9 | 34.4 |
| <i>Billardiera mutabilis</i>                        | 0.4 | 0.3 | 1.5 | 0.9 | 1.9 | 36.3 |
| <i>Lepidosperma</i> spp.                            | 0.4 | 0.2 | 1.5 | 0.9 | 1.9 | 38.2 |
| <i>Erigeron bonariense</i>                          | 0.3 | 0.0 | 1.3 | 0.6 | 1.7 | 39.8 |
| <i>Microleana stipoides</i> var. <i>stipoides</i>   | 0.4 | 0.1 | 1.3 | 0.8 | 1.7 | 41.5 |
| <i>Rhytidosporum procumbens</i>                     | 0.3 | 0.1 | 1.3 | 0.7 | 1.6 | 43.1 |
| <i>Dianella revoluta</i> var. <i>revoluta</i>       | 0.0 | 0.4 | 1.2 | 0.8 | 1.5 | 44.7 |
| <i>Cassinia aculeata</i>                            | 0.4 | 0.0 | 1.2 | 0.8 | 1.5 | 46.2 |
| <i>Deyeuxia quadriseta</i>                          | 0.4 | 0.0 | 1.2 | 0.8 | 1.5 | 47.7 |
| <i>Bursaria spinosa</i> subsp. <i>spinosa</i>       | 0.2 | 0.3 | 1.2 | 0.8 | 1.5 | 49.1 |
| <i>Gamochaeta calviceps</i>                         | 0.2 | 0.2 | 1.2 | 0.7 | 1.5 | 50.6 |

**Groups Double and Unburned**

Average dissimilarity = 82.95

| Species                                              | Double<br>Av.Abund | Unburnt<br>Av.Abund | Av.Diss | Diss/SD | Contrib% | Cum.% |
|------------------------------------------------------|--------------------|---------------------|---------|---------|----------|-------|
| <i>Daviesia buxifolia</i>                            | 1.0                | 0.2                 | 2.3     | 1.7     | 2.8      | 2.8   |
| <i>Stypantra glauca</i>                              | 0.1                | 0.8                 | 2.2     | 1.5     | 2.6      | 5.4   |
| <i>Poa sieberiana</i> var. <i>sieberiana</i>         | 0.3                | 0.9                 | 2.0     | 1.3     | 2.4      | 7.8   |
| <i>Wahlenbergia</i> spp.                             | 0.2                | 0.7                 | 1.9     | 1.2     | 2.3      | 10.1  |
| <i>Billardiera mutabilis</i>                         | 0.3                | 0.6                 | 1.7     | 1.0     | 2.1      | 12.2  |
| <i>Eucalyptus macroryncha</i>                        | 0.2                | 0.6                 | 1.7     | 1.0     | 2.0      | 14.2  |
| <i>Kunzea</i> sp (upright form)                      | 0.0                | 0.6                 | 1.7     | 1.1     | 2.0      | 16.2  |
| <i>Eucalyptus muelleriana</i>                        | 0.3                | 0.6                 | 1.6     | 1.0     | 1.9      | 18.2  |
| <i>Poranthera microphylla</i>                        | 0.2                | 0.6                 | 1.6     | 1.1     | 1.9      | 20.1  |
| <i>Cassinia longifolia</i>                           | 0.5                | 0.8                 | 1.5     | 0.9     | 1.8      | 21.9  |
| <i>Laphangium luteoalbum</i>                         | 0.5                | 0.5                 | 1.5     | 0.9     | 1.8      | 23.7  |
| <i>Eucalyptus sieberi</i>                            | 0.3                | 0.4                 | 1.5     | 0.9     | 1.7      | 25.5  |
| <i>Hibbertia obtusifolia</i>                         | 0.4                | 0.4                 | 1.4     | 0.9     | 1.7      | 27.2  |
| <i>Acacia pycnantha</i>                              | 0.5                | 0.3                 | 1.4     | 1.0     | 1.7      | 28.9  |
| <i>Lomandra filiformis</i> subsp. <i>filiformis</i>  | 0.1                | 0.5                 | 1.4     | 0.9     | 1.7      | 30.7  |
| <i>Microleana stipoides</i> var. <i>stipoides</i>    | 0.1                | 0.5                 | 1.3     | 1.0     | 1.6      | 32.2  |
| <i>Deyeuxia quadriseta</i>                           | 0.0                | 0.5                 | 1.3     | 1.0     | 1.5      | 33.8  |
| <i>Galium</i> spp.                                   | 0.1                | 0.4                 | 1.2     | 0.8     | 1.5      | 35.3  |
| <i>Opercularia varia</i>                             | 0.0                | 0.4                 | 1.2     | 0.8     | 1.5      | 36.7  |
| <i>Dianella revoluta</i> var. <i>revoluta</i>        | 0.4                | 0.2                 | 1.2     | 0.9     | 1.5      | 38.2  |
| <i>Solanum prinophyllum</i>                          | 0.1                | 0.4                 | 1.2     | 0.8     | 1.5      | 39.7  |
| <i>Eucalyptus polyanthemus</i> subsp. <i>vestita</i> | 0.1                | 0.4                 | 1.2     | 0.8     | 1.4      | 41.1  |
| <i>Goodenia ovata</i>                                | 0.3                | 0.2                 | 1.1     | 0.7     | 1.4      | 42.5  |
| <i>Rhytidosporum procumbens</i>                      | 0.1                | 0.3                 | 1.1     | 0.7     | 1.4      | 43.8  |
| <i>Veronica perfoliata</i>                           | 0.4                | 0.0                 | 1.1     | 0.8     | 1.3      | 45.1  |

| SIMPER—Shrubby Dry Forest            |     |     |     |     |     |      |
|--------------------------------------|-----|-----|-----|-----|-----|------|
| <i>Erigeron</i> spp.                 | 0.2 | 0.3 | 1.0 | 0.8 | 1.3 | 46.4 |
| <i>Hypericum gramineum</i>           | 0.0 | 0.4 | 1.0 | 0.8 | 1.2 | 47.6 |
| <i>Rytidosperma</i> spp.p            | 0.0 | 0.4 | 0.9 | 0.8 | 1.1 | 48.7 |
| <i>Gamochaeta americana purpurea</i> | 0.1 | 0.3 | 0.9 | 0.7 | 1.1 | 49.8 |
| <i>Pomax umbellata</i>               | 0.0 | 0.3 | 0.9 | 0.6 | 1.1 | 50.9 |

| SIMPER—Sub-Alpine Woodland                             |          |          |         |         |          |       |
|--------------------------------------------------------|----------|----------|---------|---------|----------|-------|
| Groups Veg and SSB                                     |          |          |         |         |          |       |
| Average dissimilarity = 75.04                          | Veg      | SSB      |         |         |          |       |
| Species                                                | Av.Abund | Av.Abund | Av.Diss | Diss/SD | Contrib% | Cum.% |
| <i>Eucalyptus pauciflora</i>                           | 1.0      | 0.0      | 2.4     | 3.0     | 3.1      | 3.1   |
| <i>Tasmania xerophila</i> subsp. <i>xerophila</i>      | 0.6      | 0.0      | 1.5     | 1.1     | 2.0      | 5.1   |
| <i>Viola betonicifolia</i> subsp. <i>betonicifolia</i> | 0.8      | 0.3      | 1.4     | 1.2     | 1.9      | 7.0   |
| <i>Polyschias sambucifolis</i> subsp. 3                | 0.5      | 0.0      | 1.4     | 0.9     | 1.8      | 8.8   |
| <i>Laphangium luteoalbum</i>                           | 0.0      | 0.6      | 1.4     | 1.0     | 1.8      | 10.6  |
| <i>Acaena novae-zelandiae</i>                          | 0.6      | 0.0      | 1.3     | 1.2     | 1.7      | 12.3  |
| <i>Goodenia hederacea</i> subsp. <i>alpestris</i>      | 0.5      | 0.0      | 1.3     | 0.9     | 1.7      | 14.0  |
| <i>Stellaria pungens</i>                               | 0.8      | 0.4      | 1.3     | 1.0     | 1.7      | 15.8  |
| <i>Podolobium alpestre</i>                             | 0.6      | 0.4      | 1.2     | 0.9     | 1.7      | 17.4  |
| <i>Senecio gunnii</i>                                  | 0.6      | 0.4      | 1.2     | 1.0     | 1.6      | 19.0  |
| <i>Luzula meridionalis</i> subsp. <i>flaccida</i>      | 0.4      | 0.6      | 1.2     | 1.0     | 1.6      | 20.7  |
| <i>Geranium</i> spp.                                   | 0.5      | 0.7      | 1.2     | 0.9     | 1.6      | 22.3  |
| <i>Polystichum proliferum</i>                          | 0.6      | 0.0      | 1.2     | 1.0     | 1.6      | 23.9  |
| <i>Acrothamnus montanus</i>                            | 0.5      | 0.0      | 1.2     | 0.9     | 1.6      | 25.5  |
| <i>Oreomyrrhis eriopoda</i>                            | 0.6      | 0.5      | 1.2     | 1.0     | 1.6      | 27.0  |
| <i>Gonocarpus montanus</i>                             | 0.6      | 0.6      | 1.1     | 0.8     | 1.5      | 28.5  |
| <i>Stylidium armeria</i> subsp. <i>armeria</i>         | 0.4      | 0.3      | 1.1     | 0.9     | 1.5      | 30.0  |
| <i>Hypochaeris radicata</i>                            | 0.8      | 0.6      | 1.1     | 0.8     | 1.5      | 31.5  |
| <i>Epilobium</i> spp.                                  | 0.4      | 0.4      | 1.1     | 0.9     | 1.4      | 32.9  |
| <i>Leptinella filicula</i>                             | 0.3      | 0.4      | 1.1     | 0.9     | 1.4      | 34.3  |
| <i>Cerastium vulgare</i>                               | 0.4      | 0.4      | 1.1     | 0.9     | 1.4      | 35.8  |
| <i>Cassinia aculeata</i>                               | 0.4      | 0.1      | 1.1     | 0.7     | 1.4      | 37.2  |
| <i>Olearia phlogopappa</i> subsp. <i>flavescens</i>    | 0.5      | 0.1      | 1.0     | 1.0     | 1.4      | 38.6  |
| <i>Acetocella vulgaris</i>                             | 0.8      | 0.7      | 1.0     | 0.7     | 1.3      | 39.9  |
| <i>Coprosma hirtella</i>                               | 0.4      | 0.0      | 1.0     | 0.7     | 1.3      | 41.2  |
| <i>Coronidium monticola</i>                            | 0.5      | 0.1      | 1.0     | 1.0     | 1.3      | 42.5  |
| <i>Viola arvensis</i>                                  | 0.3      | 0.4      | 1.0     | 0.9     | 1.3      | 43.8  |
| <i>Wahlenbergia</i> spp.                               | 0.1      | 0.4      | 0.9     | 0.8     | 1.2      | 45.0  |
| <i>Arthropodium milleflorum</i> s.l.                   | 0.4      | 0.0      | 0.9     | 0.8     | 1.2      | 46.2  |
| <i>Asperula conferta</i>                               | 0.4      | 0.1      | 0.9     | 0.8     | 1.2      | 47.4  |
| <i>Carex breviculmis</i>                               | 0.8      | 0.9      | 0.9     | 0.6     | 1.1      | 48.5  |
| <i>Trifolium</i> spp.                                  | 0.3      | 0.3      | 0.8     | 0.8     | 1.1      | 49.6  |
| <i>Celmisia tomentella</i>                             | 0.3      | 0.0      | 0.7     | 0.6     | 1.0      | 50.6  |



---

SIMPER—Sub-Alpine Woodland

---

**Groups Unburned and Double**

Average dissimilarity = 72.50

| Species                                                | Unburnt  | Double   | Av.Diss | Diss/SD | Contrib% | Cum.% |
|--------------------------------------------------------|----------|----------|---------|---------|----------|-------|
|                                                        | Av.Abund | Av.Abund |         |         |          |       |
| <i>Cerastium vulgare</i>                               | 0.8      | 0.0      | 1.7     | 1.5     | 2.4      | 2.4   |
| <i>Oreomyrrhis eriopoda</i>                            | 1.0      | 0.4      | 1.6     | 1.2     | 2.2      | 4.6   |
| <i>Trifolium</i> spp.                                  | 0.6      | 0.0      | 1.4     | 1.2     | 1.9      | 6.5   |
| <i>Luzula meridionalis</i> subsp. <i>flaccida</i>      | 0.9      | 0.4      | 1.4     | 1.1     | 1.9      | 8.4   |
| <i>Geranium</i> spp.                                   | 0.9      | 0.4      | 1.4     | 1.1     | 1.9      | 10.3  |
| <i>Hypochaeris radicata</i>                            | 1.0      | 0.5      | 1.3     | 0.9     | 1.8      | 12.1  |
| <i>Acetocella vulgaris</i>                             | 1.0      | 0.5      | 1.3     | 0.9     | 1.8      | 13.9  |
| <i>Leptinella filicula</i>                             | 0.6      | 0.3      | 1.3     | 1.0     | 1.8      | 15.7  |
| <i>Senecio gunnii</i>                                  | 0.4      | 0.6      | 1.3     | 1.0     | 1.8      | 17.5  |
| <i>Podolobium alpestre</i>                             | 0.3      | 0.6      | 1.3     | 1.0     | 1.8      | 19.3  |
| <i>Viola betonicifolia</i> subsp. <i>betonicifolia</i> | 0.6      | 0.4      | 1.2     | 1.0     | 1.7      | 21.0  |
| <i>Epilobium</i> spp.                                  | 0.5      | 0.3      | 1.2     | 0.9     | 1.6      | 22.6  |
| <i>Olearia phlogopappa</i> subsp. <i>flavescens</i>    | 0.5      | 0.1      | 1.2     | 0.9     | 1.6      | 24.1  |
| <i>Stellaria pungens</i>                               | 0.6      | 0.6      | 1.1     | 0.9     | 1.6      | 25.7  |
| <i>Eucalyptus pauciflora</i>                           | 0.5      | 0.5      | 1.1     | 1.0     | 1.5      | 27.2  |
| <i>Dichondra repens</i>                                | 0.5      | 0.0      | 1.0     | 0.9     | 1.4      | 28.7  |
| <i>Asperula conferta</i>                               | 0.4      | 0.3      | 1.0     | 0.8     | 1.4      | 30.1  |
| <i>Acaena novaezelandiae</i>                           | 0.5      | 0.1      | 1.0     | 0.9     | 1.4      | 31.5  |
| <i>Goodenia hederacea</i> subsp. <i>alpestris</i>      | 0.0      | 0.5      | 1.0     | 1.0     | 1.4      | 32.9  |
| <i>Carex breviculmis</i>                               | 1.0      | 0.6      | 1.0     | 0.7     | 1.3      | 34.2  |
| <i>Brachyscome decipiens</i>                           | 0.5      | 0.0      | 1.0     | 1.0     | 1.3      | 35.5  |
| <i>Galium</i> spp.                                     | 0.4      | 0.1      | 0.9     | 0.8     | 1.3      | 36.8  |
| <i>Poranthera microphylla</i>                          | 0.4      | 0.0      | 0.9     | 0.7     | 1.3      | 38.1  |
| <i>Gonocarpus montanus</i>                             | 0.6      | 0.9      | 0.9     | 0.8     | 1.3      | 39.4  |
| <i>Tasmania xerophila</i> subsp. <i>xerophila</i>      | 0.4      | 0.3      | 0.9     | 0.8     | 1.3      | 40.7  |
| <i>Cassinia aculeata</i>                               | 0.1      | 0.4      | 0.9     | 0.8     | 1.3      | 41.9  |
| <i>Asperula gunnii</i>                                 | 0.3      | 0.3      | 0.9     | 0.7     | 1.2      | 43.2  |
| <i>Polystichum proliferum</i>                          | 0.4      | 0.1      | 0.9     | 0.8     | 1.2      | 44.4  |
| <i>Anthoxanthum odoratum</i>                           | 0.4      | 0.0      | 0.8     | 0.7     | 1.1      | 45.5  |
| <i>Viola arvensis</i>                                  | 0.4      | 0.1      | 0.8     | 0.8     | 1.1      | 46.6  |
| <i>Wahlenbergia</i> spp.                               | 0.3      | 0.1      | 0.8     | 0.6     | 1.1      | 47.7  |
| <i>Polyschias sambucifolis</i> subsp. 3                | 0.0      | 0.4      | 0.8     | 0.8     | 1.1      | 48.8  |
| <i>Laphangium luteoalbum</i>                           | 0.1      | 0.3      | 0.8     | 0.6     | 1.1      | 49.9  |
| <i>Acacia alpina</i>                                   | 0.3      | 0.1      | 0.8     | 0.6     | 1.1      | 51.0  |

**Groups Unburned and Triple**

Average dissimilarity = 67.63

| Species                                           | Unburnt  | Triple   | Av.Diss | Diss/SD | Contrib% | Cum.% |
|---------------------------------------------------|----------|----------|---------|---------|----------|-------|
|                                                   | Av.Abund | Av.Abund |         |         |          |       |
| <i>Luzula meridionalis</i> subsp. <i>flaccida</i> | 0.9      | 0.3      | 1.4     | 1.3     | 2.1      | 2.1   |
| <i>Oreomyrrhis eriopoda</i>                       | 1.0      | 0.4      | 1.4     | 1.2     | 2.0      | 4.1   |
| <i>Gonocarpus montanus</i>                        | 0.6      | 0.4      | 1.1     | 1.0     | 1.7      | 5.8   |
| <i>Leptinella filicula</i>                        | 0.6      | 0.3      | 1.1     | 1.0     | 1.6      | 7.4   |

---

SIMPER—Sub-Alpine Woodland

|                                                        |     |     |     |     |     |      |
|--------------------------------------------------------|-----|-----|-----|-----|-----|------|
| <i>Trifolium</i> spp.                                  | 0.6 | 0.4 | 1.1 | 1.0 | 1.6 | 9.0  |
| <i>Wahlenbergia</i> spp.                               | 0.3 | 0.5 | 1.0 | 0.9 | 1.5 | 10.5 |
| <i>Stellaria pungens</i>                               | 0.6 | 0.5 | 1.0 | 0.9 | 1.5 | 12.1 |
| <i>Cerastium vulgare</i>                               | 0.8 | 0.5 | 1.0 | 0.9 | 1.5 | 13.6 |
| <i>Epilobium</i> spp.                                  | 0.5 | 0.4 | 1.0 | 0.9 | 1.5 | 15.1 |
| <i>Olearia phlogopappa</i> subsp. <i>flavescens</i>    | 0.5 | 0.3 | 1.0 | 0.9 | 1.5 | 16.5 |
| <i>Viola betonicifolia</i> subsp. <i>betonicifolia</i> | 0.6 | 0.6 | 1.0 | 0.9 | 1.4 | 18.0 |
| <i>Eucalyptus pauciflora</i>                           | 0.5 | 0.5 | 1.0 | 1.0 | 1.4 | 19.4 |
| <i>Laphangium luteoalbum</i>                           | 0.1 | 0.4 | 1.0 | 0.8 | 1.4 | 20.8 |
| <i>Coronidium monticola</i>                            | 0.4 | 0.5 | 0.9 | 1.0 | 1.4 | 22.2 |
| <i>Senecio gunnii</i>                                  | 0.4 | 0.5 | 0.9 | 1.0 | 1.4 | 23.6 |
| <i>Acaena novaezelandiae</i>                           | 0.5 | 0.3 | 0.9 | 0.9 | 1.4 | 25.0 |
| <i>Dichondra repens</i>                                | 0.5 | 0.0 | 0.9 | 0.9 | 1.4 | 26.3 |
| <i>Stylidium armeria</i> subsp. <i>armeria</i>         | 0.1 | 0.5 | 0.9 | 1.0 | 1.4 | 27.7 |
| <i>Asperula conferta</i>                               | 0.4 | 0.3 | 0.9 | 0.8 | 1.3 | 29.0 |
| <i>Viola arvensis</i>                                  | 0.4 | 0.4 | 0.9 | 0.9 | 1.3 | 30.3 |
| <i>Brachyscome decipiens</i>                           | 0.5 | 0.0 | 0.9 | 1.0 | 1.3 | 31.5 |
| <i>Geranium</i> spp.                                   | 0.9 | 0.6 | 0.8 | 0.8 | 1.2 | 32.8 |
| <i>Arthropodium milleflorum</i> s.l.                   | 0.4 | 0.4 | 0.8 | 0.9 | 1.2 | 34.0 |
| <i>Podolobium alpestre</i>                             | 0.3 | 0.4 | 0.8 | 0.8 | 1.2 | 35.2 |
| <i>Olearia speciosa</i>                                | 0.3 | 0.4 | 0.8 | 0.8 | 1.2 | 36.4 |
| <i>Polystichum proliferum</i>                          | 0.4 | 0.3 | 0.8 | 0.8 | 1.2 | 37.6 |
| <i>Poranthera microphylla</i>                          | 0.4 | 0.0 | 0.8 | 0.7 | 1.2 | 38.8 |
| <i>Poa sieberiana</i> var. <i>sieberiana</i>           | 0.3 | 0.4 | 0.8 | 0.9 | 1.1 | 40.0 |
| <i>Galium</i> sp_combined                              | 0.4 | 0.0 | 0.8 | 0.7 | 1.1 | 41.1 |
| <i>Tasmania xerophila</i> subsp. <i>xerophila</i>      | 0.4 | 0.1 | 0.7 | 0.8 | 1.1 | 42.2 |
| <i>Anthoxanthum odoratum</i>                           | 0.4 | 0.0 | 0.7 | 0.7 | 1.1 | 43.3 |
| <i>Euchiton involucratus</i>                           | 0.1 | 0.3 | 0.7 | 0.6 | 1.1 | 44.3 |
| <i>Senecio prenanthoides</i>                           | 0.4 | 0.1 | 0.7 | 0.8 | 1.1 | 45.4 |
| <i>Hypochaeris radicata</i>                            | 1.0 | 0.8 | 0.7 | 0.6 | 1.0 | 46.4 |
| <i>Daviesia ulicifolia</i> subsp. <i>ulicifolia</i>    | 0.3 | 0.3 | 0.7 | 0.8 | 1.0 | 47.3 |
| <i>Erigeron sumatrensis</i>                            | 0.3 | 0.1 | 0.7 | 0.6 | 1.0 | 48.3 |
| <i>Euchiton japonicus</i>                              | 0.3 | 0.1 | 0.7 | 0.6 | 1.0 | 49.3 |
| <i>Hypericum perfoliatum</i> subsp. <i>veronense</i>   | 0.0 | 0.4 | 0.7 | 0.7 | 1.0 | 50.2 |

**Groups Double and Triple**

Average dissimilarity = 71.41

| Species                                                | Double   | Triple   | Av.Diss | Diss/SD | Contrib% | Cum.% |
|--------------------------------------------------------|----------|----------|---------|---------|----------|-------|
|                                                        | Av.Abund | Av.Abund |         |         |          |       |
| <i>Gonocarpus montanus</i>                             | 0.9      | 0.4      | 1.9     | 1.0     | 2.7      | 2.7   |
| <i>Senecio gunnii</i>                                  | 0.6      | 0.5      | 1.7     | 0.8     | 2.4      | 5.1   |
| <i>Wahlenbergia</i> spp.                               | 0.1      | 0.5      | 1.7     | 0.8     | 2.4      | 7.6   |
| <i>Acetocella vulgaris</i>                             | 0.5      | 0.9      | 1.7     | 0.8     | 2.4      | 9.9   |
| <i>Geranium</i> spp.                                   | 0.4      | 0.6      | 1.7     | 0.8     | 2.4      | 12.3  |
| <i>Podolobium alpestre</i>                             | 0.6      | 0.4      | 1.7     | 0.9     | 2.3      | 14.6  |
| <i>Viola betonicifolia</i> subsp. <i>betonicifolia</i> | 0.4      | 0.6      | 1.7     | 0.8     | 2.3      | 16.9  |
| <i>Laphangium luteoalbum</i>                           | 0.3      | 0.4      | 1.6     | 0.7     | 2.3      | 19.2  |

---

SIMPER—Sub-Alpine Woodland

|                                                   |     |     |     |     |     |      |
|---------------------------------------------------|-----|-----|-----|-----|-----|------|
| <i>Cerastium vulgare</i>                          | 0.0 | 0.5 | 1.6 | 0.8 | 2.2 | 21.4 |
| <i>Hypochaeris radicata</i>                       | 0.5 | 0.8 | 1.6 | 0.9 | 2.2 | 23.6 |
| <i>Stellaria pungens</i>                          | 0.6 | 0.5 | 1.5 | 0.9 | 2.1 | 25.7 |
| <i>Eucalyptus pauciflora</i>                      | 0.5 | 0.5 | 1.4 | 0.9 | 2.0 | 27.7 |
| <i>Carex breviculmis</i>                          | 0.6 | 1.0 | 1.4 | 0.6 | 2.0 | 29.7 |
| <i>Goodenia hederacea</i> subsp. <i>alpestris</i> | 0.5 | 0.4 | 1.4 | 0.9 | 1.9 | 31.6 |
| <i>Stylidium armeria</i> subsp. <i>armeria</i>    | 0.3 | 0.5 | 1.3 | 0.9 | 1.9 | 33.4 |
| <i>Luzula meridionalis</i> subsp. <i>flaccida</i> | 0.4 | 0.3 | 1.3 | 0.8 | 1.8 | 35.3 |
| <i>Polyschias sambucifolis</i> subsp. <i>3</i>    | 0.4 | 0.4 | 1.3 | 0.9 | 1.8 | 37.1 |
| <i>Oreomyrrhis eriopoda</i>                       | 0.4 | 0.4 | 1.3 | 0.9 | 1.8 | 38.8 |
| <i>Leptinella filicula</i>                        | 0.3 | 0.3 | 1.3 | 0.6 | 1.8 | 40.6 |
| <i>Cassinia aculeata</i>                          | 0.4 | 0.3 | 1.2 | 0.8 | 1.7 | 42.3 |
| <i>Coronidium monticola</i>                       | 0.0 | 0.5 | 1.2 | 0.9 | 1.7 | 44.0 |
| <i>Coprosma hirtella</i>                          | 0.3 | 0.4 | 1.2 | 0.8 | 1.6 | 45.6 |
| <i>Epilobium</i> spp.                             | 0.3 | 0.4 | 1.1 | 0.8 | 1.6 | 47.2 |
| <i>Viola arvensis</i>                             | 0.1 | 0.4 | 1.1 | 0.8 | 1.5 | 48.7 |
| <i>Senecio vellioides</i>                         | 0.0 | 0.3 | 1.1 | 0.5 | 1.5 | 50.2 |

**Groups Single and Triple**

Average dissimilarity = 71.30

| Species                                                | Single<br>Av.Abund | Triple<br>Av.Abund | Av.Diss | Diss/SD | Contrib% | Cum.% |
|--------------------------------------------------------|--------------------|--------------------|---------|---------|----------|-------|
| <i>Podolobium alpestre</i>                             | 0.9                | 0.4                | 1.5     | 1.1     | 2.2      | 2.2   |
| <i>Gonocarpus montanus</i>                             | 0.6                | 0.4                | 1.3     | 1.0     | 1.8      | 4.0   |
| <i>Wahlenbergia</i> spp.                               | 0.0                | 0.5                | 1.3     | 0.9     | 1.8      | 5.8   |
| <i>Stellaria pungens</i>                               | 0.8                | 0.5                | 1.3     | 0.9     | 1.8      | 7.6   |
| <i>Viola betonicifolia</i> subsp. <i>betonicifolia</i> | 0.4                | 0.6                | 1.3     | 1.0     | 1.8      | 9.4   |
| <i>Stylidium armeria</i> subsp. <i>armeria</i>         | 0.5                | 0.5                | 1.2     | 0.9     | 1.7      | 11.1  |
| <i>Geranium</i> spp.                                   | 0.5                | 0.6                | 1.2     | 0.9     | 1.7      | 12.8  |
| <i>Cerastium vulgare</i>                               | 0.4                | 0.5                | 1.2     | 0.9     | 1.7      | 14.5  |
| <i>Laphangium luteoalbum</i>                           | 0.4                | 0.4                | 1.2     | 0.9     | 1.7      | 16.1  |
| <i>Eucalyptus pauciflora</i>                           | 0.5                | 0.5                | 1.2     | 0.9     | 1.7      | 17.8  |
| <i>Viola arvensis</i>                                  | 0.5                | 0.4                | 1.2     | 0.9     | 1.6      | 19.4  |
| <i>Luzula meridionalis</i> subsp. <i>flaccida</i>      | 0.5                | 0.3                | 1.2     | 0.9     | 1.6      | 21.1  |
| <i>Epilobium</i> spp.                                  | 0.5                | 0.4                | 1.2     | 0.9     | 1.6      | 22.7  |
| <i>Senecio gunnii</i>                                  | 0.5                | 0.5                | 1.2     | 0.9     | 1.6      | 24.3  |
| <i>Tasmania xerophila</i> subsp. <i>xerophila</i>      | 0.5                | 0.1                | 1.1     | 0.9     | 1.6      | 25.9  |
| <i>Oreomyrrhis eriopoda</i>                            | 0.5                | 0.4                | 1.1     | 0.9     | 1.6      | 27.5  |
| <i>Hypochaeris radicata</i>                            | 0.6                | 0.8                | 1.1     | 0.8     | 1.6      | 29.0  |
| <i>Leptinella filicula</i>                             | 0.4                | 0.3                | 1.1     | 0.8     | 1.5      | 30.5  |
| <i>Acetocella vulgaris</i>                             | 0.6                | 0.9                | 1.1     | 0.8     | 1.5      | 32.0  |
| <i>Coronidium monticola</i>                            | 0.3                | 0.5                | 1.0     | 1.0     | 1.5      | 33.5  |
| <i>Polyschias sambucifolis</i> subsp. <i>3</i>         | 0.3                | 0.4                | 1.0     | 0.8     | 1.4      | 34.9  |
| <i>Erigeron</i> sp                                     | 0.4                | 0.0                | 1.0     | 0.7     | 1.3      | 36.2  |
| <i>Acrothamnus montanus</i>                            | 0.4                | 0.3                | 0.9     | 0.8     | 1.3      | 37.5  |
| <i>Acaena novaezelandiae</i>                           | 0.4                | 0.3                | 0.9     | 0.8     | 1.3      | 38.8  |
| <i>Polystichum proliferum</i>                          | 0.4                | 0.3                | 0.9     | 0.8     | 1.3      | 40.1  |

---

|                                                     |     |     |     |     |     |      |
|-----------------------------------------------------|-----|-----|-----|-----|-----|------|
| SIMPER—Sub-Alpine Woodland                          |     |     |     |     |     |      |
| <i>Olearia phlogopappa</i> subsp. <i>flavescens</i> | 0.4 | 0.3 | 0.9 | 0.8 | 1.3 | 41.3 |
| <i>Coprosma hirtella</i>                            | 0.1 | 0.4 | 0.9 | 0.8 | 1.2 | 42.6 |
| <i>Senecio vellioides</i>                           | 0.1 | 0.3 | 0.9 | 0.6 | 1.2 | 43.8 |
| <i>Goodenia hederacea</i> subsp. <i>alpestris</i>   | 0.1 | 0.4 | 0.8 | 0.8 | 1.2 | 44.9 |
| <i>Asperula pusilla</i>                             | 0.1 | 0.3 | 0.8 | 0.6 | 1.1 | 46.1 |
| <i>Trifolium</i> spp.                               | 0.1 | 0.4 | 0.8 | 0.8 | 1.1 | 47.2 |
| <i>Pimelea alpina</i>                               | 0.4 | 0.0 | 0.8 | 0.7 | 1.1 | 48.3 |
| <i>Poa sieberiana</i> var. <i>sieberiana</i>        | 0.1 | 0.4 | 0.8 | 0.8 | 1.1 | 49.4 |
| <i>Dianella tasmanica</i>                           | 0.3 | 0.3 | 0.8 | 0.7 | 1.1 | 50.5 |

---

**Table S10** Significance of Vegetation Type and Fire Frequency effects on trait associations for Shrubby Dry Forest. For each trait there was no significant ( $P > 0.05$ ) Vegetation Type  $\times$  Fire Frequency interaction. Values represent the mean proportion of species with each attribute according to Vegetation Type and Fire Frequency. SIMPER tests provide the mean contribution to dissimilarity for significant pairwise comparisons. Bold values indicate the two attributes that contributed most strongly to dissimilarity for each pairwise comparison.

| Trait and attribute   | Vegetation Type                |      | Dissimilarity % | Fire Frequency <sup>A</sup>   |      |      |      | Dissimilarity % |             |
|-----------------------|--------------------------------|------|-----------------|-------------------------------|------|------|------|-----------------|-------------|
|                       | veg                            | ssb  | veg v ssb       | UB                            | S07  | S13  | D    | S13 v D         | UB v D      |
| <b>Life Form</b>      | $F(1, 32) = 37.55, P = 0.0001$ |      |                 | $F(1, 32) = 2.35, P = 0.0186$ |      |      |      |                 |             |
|                       |                                |      | 50.7****        | a                             | ab   | a    | b    | 44.8**          | 41.6*       |
| Erect Rosette         | 19.7                           | 10.2 | 6.4             | 4.8                           | 16.7 | 14.8 | 11.6 | 7.9             | 8.0         |
| Therophyte            | 1.9                            | 29.6 | <b>34.0</b>     | 10.2                          | 18.7 | 16.5 | 17.7 | <b>25.2</b>     | <b>24.0</b> |
| Chamaephyte           | 7.8                            | 9.3  | 3.7             | 7.7                           | 5.8  | 10.7 | 9.8  | 5.4             | 6.2         |
| Proto-hemicryptophyte | 7.2                            | 15.3 | 5.6             | 14.7                          | 9.9  | 14.1 | 6.4  | 7.0             | 9.0         |
| Flat Rosette          | 4.4                            | 3.3  | 1.7             | 4.8                           | 5.3  | 4.5  | 0.8  | 1.7             | 2.0         |
| Geophyte              | 0.9                            | 3.2  | 0.8             | 2.9                           | 1.8  | 2.6  | 0.8  | 1.0             | 1.1         |
| Phanerophyte          | 56.3                           | 26.5 | <b>46.8</b>     | 40.1                          | 39.2 | 33.5 | 52.9 | <b>50.8</b>     | <b>48.9</b> |
| Epiphyte              | 1.0                            | 0.0  | 0.2             | 0.0                           | 1.5  | 0.4  | 0.0  | 0.1             | 0.0         |
| Partial Rosette       | 0.8                            | 2.6  | 0.6             | 2.7                           | 1.2  | 2.7  | 0.0  | 0.9             | 0.7         |
| <b>Dispersal Mode</b> | $F(1, 32) = 30.74, P = 0.0001$ |      |                 | $F(1, 32) = 1.93, P = 0.0318$ |      |      |      |                 |             |
|                       |                                |      | 42.3****        | a                             | ab   | a    | b    | 36.8*           | 36.2*       |
| Barochore             | 38.0                           | 23.0 | <b>20.2</b>     | 30.8                          | 31.9 | 32.1 | 27.2 | <b>20.2</b>     | <b>19.7</b> |
| Anemochore            | 9.4                            | 34.8 | <b>43.2</b>     | 16.6                          | 22.8 | 20.8 | 28.2 | <b>38.7</b>     | <b>39.9</b> |
| Myrmecochore          | 28.0                           | 16.2 | 14.8            | 22.6                          | 19.3 | 20.6 | 25.8 | 14.4            | 12.0        |
| Endozoochore          | 12.4                           | 4.2  | 7.7             | 7.0                           | 11.4 | 4.8  | 9.9  | 7.9             | 7.0         |
| Mobile                | 8.2                            | 18.3 | 11.9            | 17.7                          | 11.9 | 16.9 | 6.5  | 15.4            | 17.9        |
| Epizoochore           | 3.9                            | 3.6  | 2.2             | 5.3                           | 2.6  | 4.8  | 2.4  | 3.5             | 3.5         |
| <b>Fire Response</b>  | $F(1, 32) = 55.82, P = 0.0001$ |      |                 | $F(1, 32) = 1.53, P = 0.1484$ |      |      |      |                 |             |
|                       |                                |      | 45.5****        |                               |      |      |      |                 |             |
| R                     | 53.9                           | 29.1 | <b>36.1</b>     | 44.4                          | 40.9 | 38.7 | 42.0 |                 |             |
| S                     | 17.4                           | 49.1 | <b>51.4</b>     | 28.5                          | 32.2 | 33.3 | 39.1 |                 |             |
| Rs                    | 8.0                            | 4.7  | 3.6             | 7.1                           | 8.9  | 7.9  | 1.5  |                 |             |
| SR                    | 13.2                           | 7.7  | 5.0             | 8.5                           | 9.5  | 11.4 | 12.3 |                 |             |
| Sr                    | 7.5                            | 9.4  | 3.8             | 11.5                          | 8.6  | 8.7  | 5.0  |                 |             |

PERMANOVA tested for differences in Euclidean distance between Vegetation Type, Fire Frequency, and their interaction. Significant pairwise comparisons are indicated (\*  $P \leq 0.05$ , \*\*  $P \leq 0.01$ , \*\*\*  $P \leq 0.001$ , and \*\*\*\*  $P \leq 0.0001$ ).

<sup>A</sup> Fire Frequency (UB, Unburnt; S07, Single2007; S13, Single 2013; and D, Double)

**Table S11** Significance of Vegetation Type and Fire Frequency effects on trait associations for Sub-Alpine Woodland. For each trait there was no significant ( $P > 0.05$ ) Vegetation Type  $\times$  Fire Frequency interaction. Values represent the mean proportion of species with each attribute according to Vegetation Type and Fire Frequency. SIMPER tests provide the mean contribution to dissimilarity for significant pairwise comparisons. Bold values indicate the two attributes that contributed most strongly to dissimilarity for each pairwise comparison.

| Trait and attribute   | Vegetation Type                |      | Dissimilarity % | Fire Frequency <sup>A</sup>   |      |      |      |
|-----------------------|--------------------------------|------|-----------------|-------------------------------|------|------|------|
|                       | veg                            | ssb  | veg v ssb       | UB                            | S    | D    | T    |
| <b>Life Form</b>      | $F(1, 24) = 27.01, P = 0.0001$ |      |                 | $F(1, 24) = 1.67, P = 0.0638$ |      |      |      |
|                       |                                |      | 40.6****        |                               |      |      |      |
| Erect Rosette         | 18.7                           | 31.4 | 13.2            | 24.9                          | 22.2 | 26.4 | 26.7 |
| Therophyte            | 3.0                            | 14.9 | 12.5            | 8.3                           | 8.3  | 6.5  | 12.8 |
| Chamaephyte           | 13.9                           | 3.6  | 8.3             | 9.9                           | 9.4  | 7.7  | 8.0  |
| Proto-hemicryptophyte | 12.6                           | 26.0 | <b>15.6</b>     | 16.3                          | 18.2 | 24.6 | 18.0 |
| Flat Rosette          | 9.1                            | 8.5  | 2.8             | 13.2                          | 9.2  | 6.8  | 6.0  |
| Geophyte              | 2.1                            | 1.7  | 0.8             | 1.6                           | 1.2  | 3.2  | 1.7  |
| Phanerophyte          | 29.5                           | 5.7  | <b>41.3</b>     | 15.0                          | 23.5 | 19.0 | 12.8 |
| Epiphyte              | 0.0                            | 0.0  | 0.0             | 0.0                           | 0.0  | 0.0  | 0.0  |
| Partial Rosette       | 11.1                           | 8.2  | 5.4             | 10.9                          | 8.0  | 5.8  | 14.0 |
| <b>Dispersal Mode</b> | $F(1, 24) = 5.89, P = 0.0008$  |      |                 | $F(1, 24) = 0.59, P = 0.8168$ |      |      |      |
|                       |                                |      | 30.3***         |                               |      |      |      |
| Barochore             | 39.1                           | 49.3 | <b>34.3</b>     | 46.0                          | 40.5 | 46.6 | 43.9 |
| Anemochore            | 23.8                           | 28.4 | <b>24.0</b>     | 23.2                          | 25.0 | 26.5 | 29.8 |
| Myrmecochore          | 14.8                           | 9.4  | 11.3            | 9.8                           | 13.2 | 15.0 | 10.6 |
| Endozoochore          | 12.5                           | 0.8  | 16.5            | 6.4                           | 8.1  | 6.1  | 6.0  |
| Mobile                | 4.9                            | 8.7  | 10.3            | 7.6                           | 8.4  | 4.1  | 7.1  |
| Epizoochore           | 4.8                            | 3.3  | 3.5             | 7.0                           | 4.8  | 1.8  | 2.6  |
| <b>Fire Response</b>  | $F(1, 24) = 1.77, P = 0.1518$  |      |                 | $F(1, 24) = 1.15, P = 0.3399$ |      |      |      |
| R                     | 45.4                           | 43.0 |                 | 38.8                          | 42.0 | 47.6 | 48.4 |
| S                     | 21.7                           | 29.1 |                 | 28.4                          | 27.2 | 21.0 | 24.9 |
| Rs                    | 14.3                           | 11.3 |                 | 11.5                          | 11.5 | 17.4 | 10.7 |
| SR                    | 12.8                           | 10.7 |                 | 14.1                          | 12.1 | 9.2  | 11.6 |
| Sr                    | 5.8                            | 6.0  |                 | 7.3                           | 7.3  | 7.7  | 4.3  |

PERMANOVA tested for differences in Euclidean distance between Vegetation Type, Fire Frequency, and their interaction. Significant pairwise comparisons are indicated (\*  $P \leq 0.05$ , \*\*  $P \leq 0.01$ , \*\*\*  $P \leq 0.001$ , and \*\*\*\*  $P \leq 0.0001$ ).

<sup>A</sup> Fire Frequency (UB, Unburnt; S, Single; D, Double; and T, Triple)

**Figure S1** Map of the study area showing the distribution of the two forest types and location of study sites. The reference coordinate system used is VicGrid GDA2020.

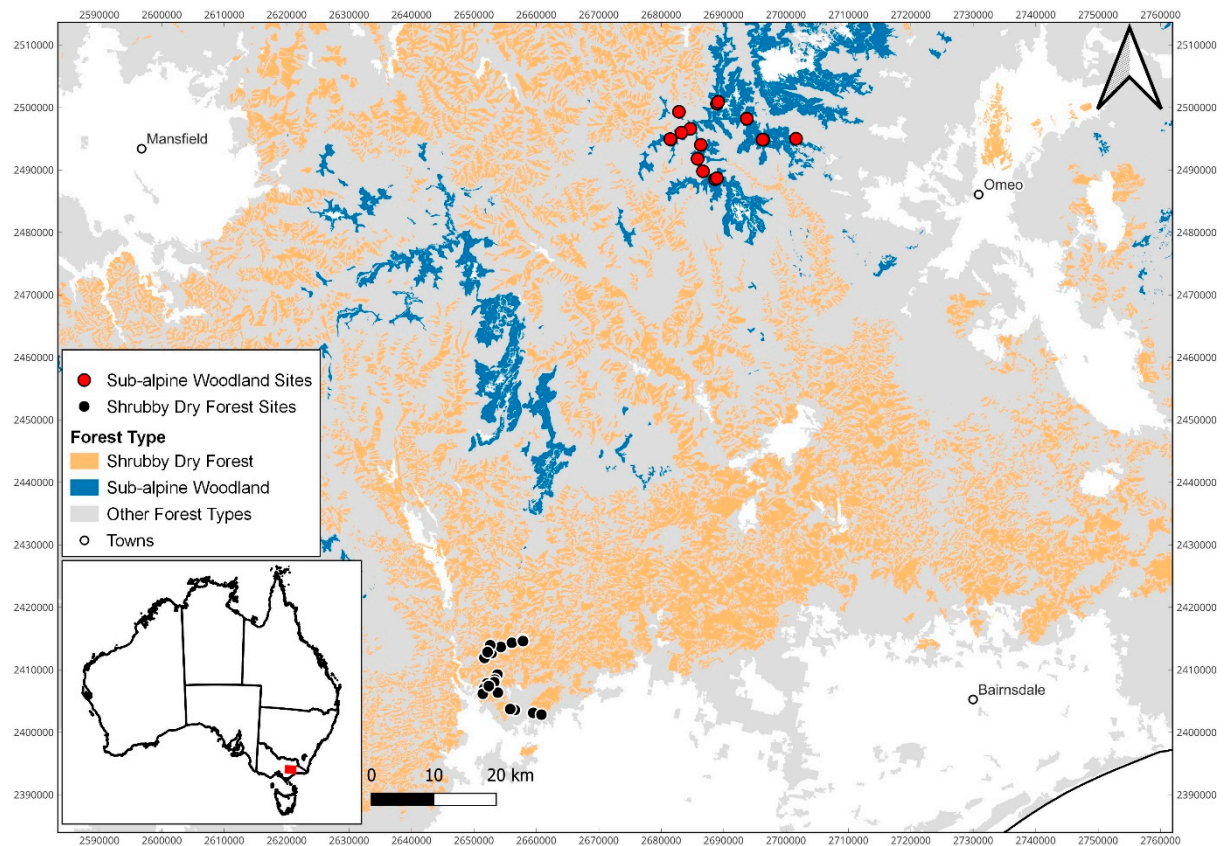



**Figure S2** Examples of study plots of the two forest types burnt at different frequencies: (a) unburnt Sub-Alpine Woodland (last burnt 1939, photo November 2017), (b) triple-burnt Sub-Alpine Woodland (last burnt January 2013, photo November 2017), (c) unburnt Shrubby Dry Forests (last burnt 1990, photo October 2017), and (d) double-burnt Shrubby Dry Forest (last burnt January 2013, photo October 2017).

(a) Unburnt Sub-Alpine Woodland

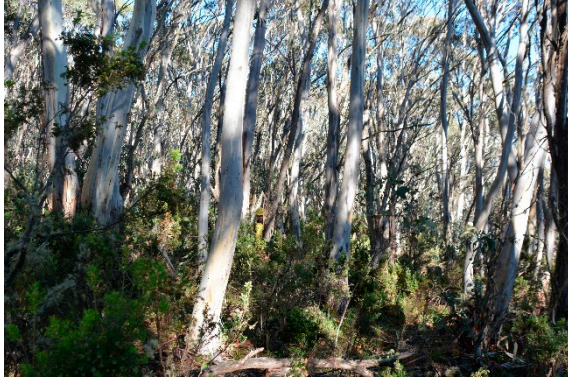

(b) Triple-burnt Sub-Alpine Woodland

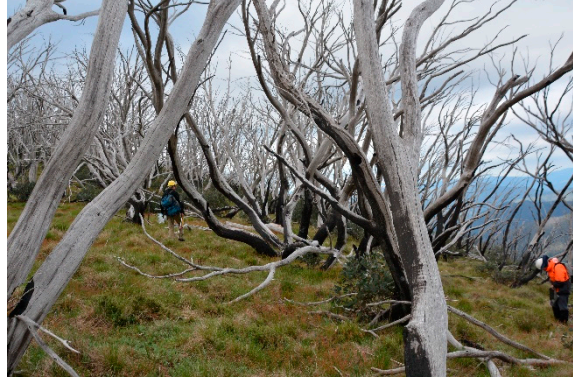

(c) Unburnt Shrubby Dry Forest

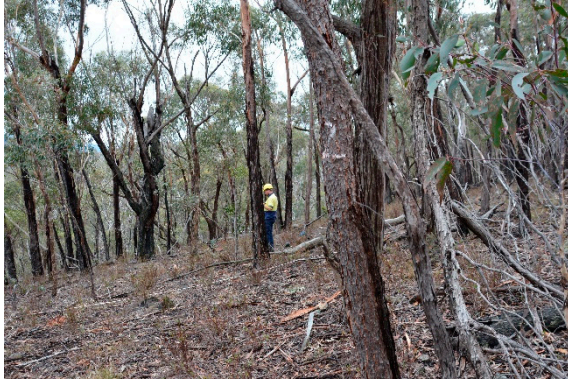

(d) Double-burnt Shrubby Dry Forest

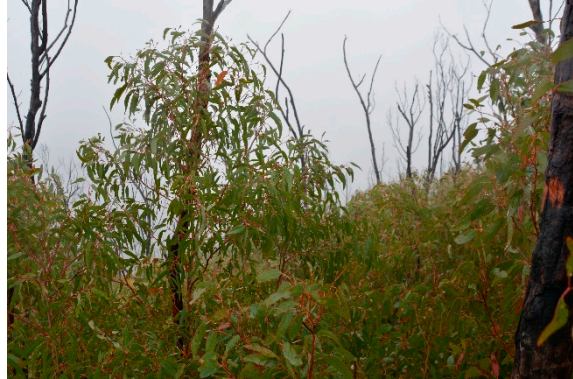



**Figure S3** Shannon's Diversity ( $H'$ ) of all species (a), native species (b), and introduced species (c) in the soil seed bank according to Fire Frequency for Shrubby Dry Forest and Sub-Alpine Woodland. Bars represent means with one standard error. Significance of effects were determined via two-way PERMANOVA (on Euclidean distance) of Treatment (T), Fire Frequency (F), and their interaction (T  $\times$  F). For each species pool (total, native, and introduced) significant effects are indicated by superscript letters ( $P \leq 0.05$ ). Statistical analyses in Table S5. (\*  $P \leq 0.05$ , \*\*  $P \leq 0.01$ , \*\*\*  $P \leq 0.001$ , \*\*\*\*  $P \leq 0.0001$ , and NS not significant)

(a) All species

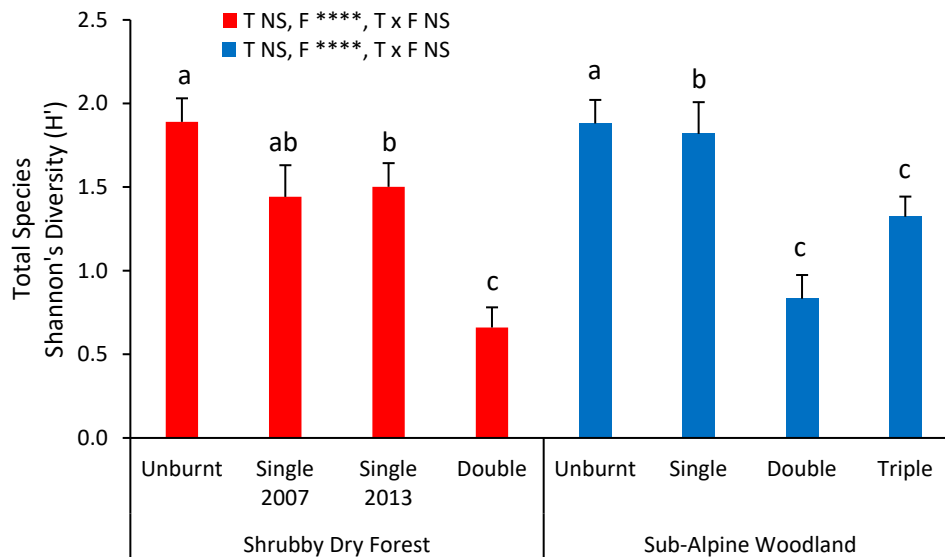

(b) Native Species

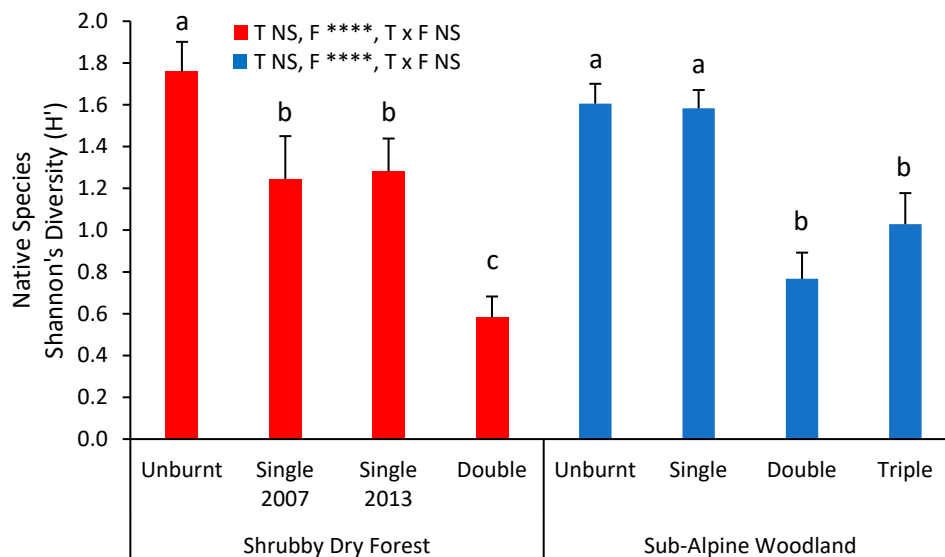

Figure S3 (cont.)

(c) Introduced Species

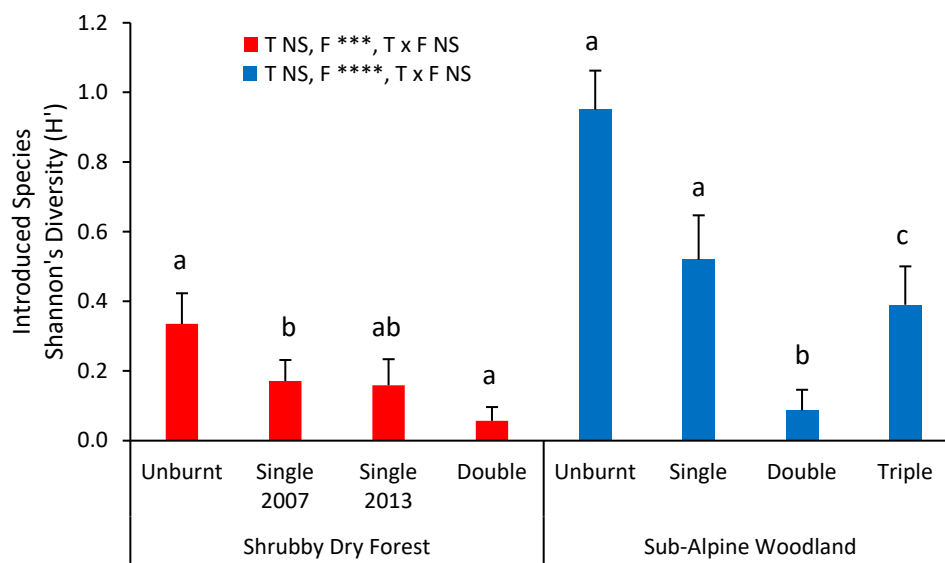

**Figure S4** Total aggregated species richness (across all sites) for traits within each plant functional type (dispersal mode, life form, and fire response strategy). Totals are defined according to those species restricted to the soil seed bank or extant vegetation, and those shared between vegetation types within Shrubby Dry Forest (top) and Sub-Alpine Woodland (bottom). Trait abbreviations follow Table S2. N/A, not available.

#### Shrubby Dry Forest

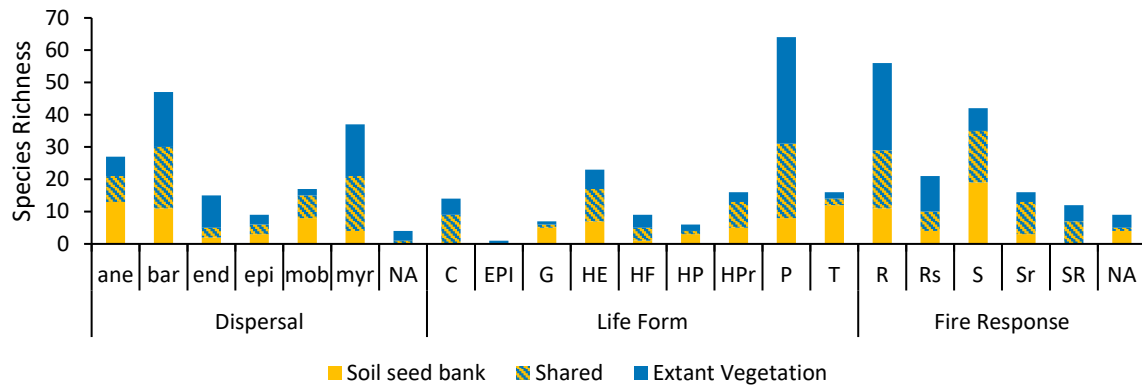

#### Sub-Alpine Woodland

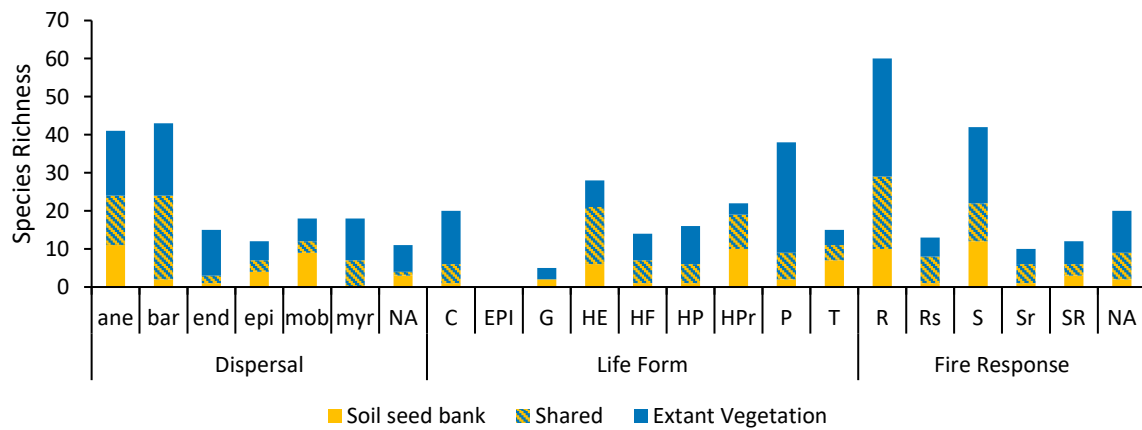

**Figure S5** Shannon's Diversity ( $H'$ ) of all species (a), native species (b), and introduced species (c) in the extant vegetation and soil seed bank (combined pool across all treatments) according to Fire Frequency for (a) Shrubby Dry Forest and (b) Sub-Alpine Woodland. Bars represent means with one standard error. Significance of effects were determined via one-way PERMANOVA (on Euclidean distance) of Fire Frequency (F). There was no test for vegetation type effects on  $H'$  due to differences in abundance measures for extant vegetation and soil seed bank. For each species pool (total, native, introduced) significant effects are indicated by superscript letters ( $P \leq 0.05$ ). Statistical analyses in Table S8. (\*  $P \leq 0.05$ , \*\*  $P \leq 0.01$ , \*\*\*  $P \leq 0.001$ , \*\*\*\*  $P \leq 0.0001$ , and NS not significant). There are no data for introduced species in Shrubby Dry Forest due to lack of species.

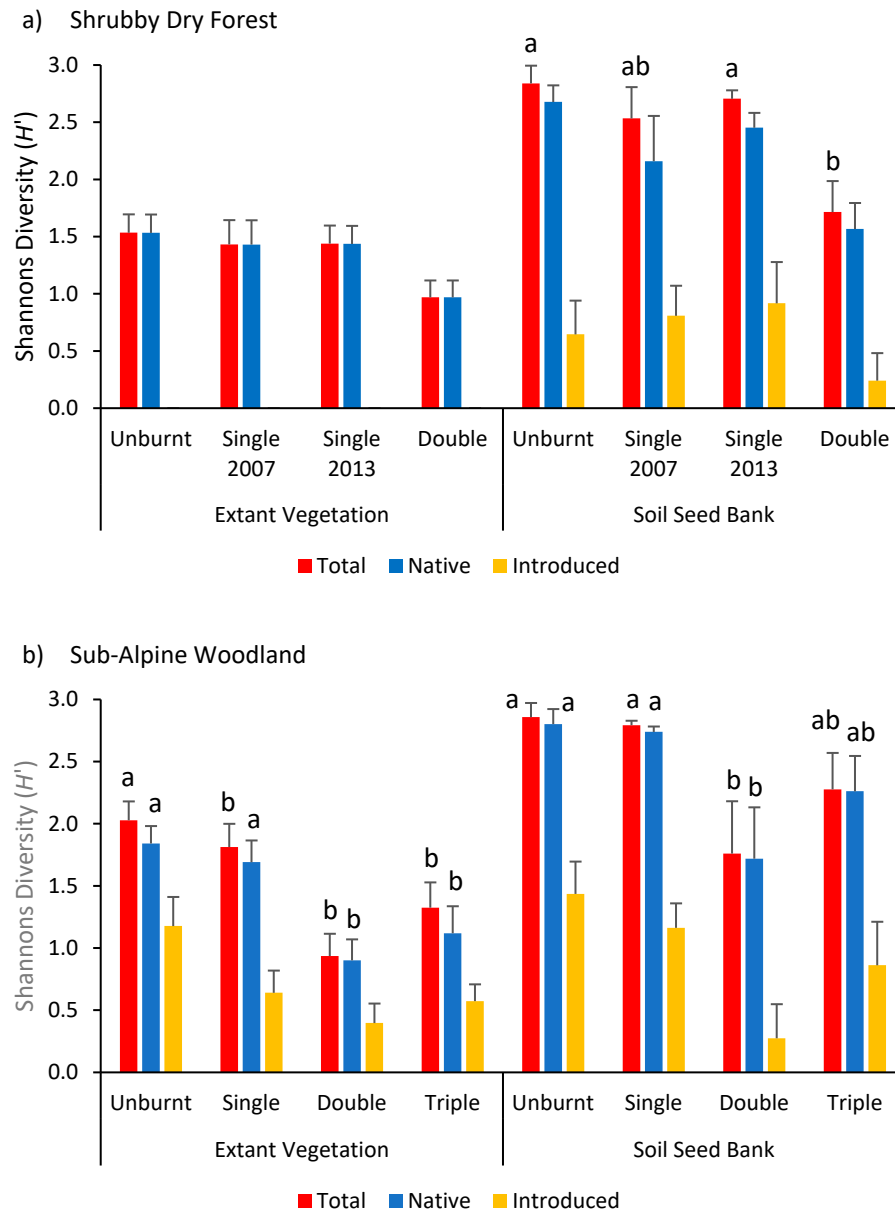

## References

1. Raunkiaer, C. *The life forms of plants and statistical plant geography*; Oxford University Press: Oxford, 1934.
2. McIntyre, S.; Lavorel, S.; Tremont, R.M. Plant life-history attributes: their relationships to disturbance response in herbaceous vegetation. *Journal of Ecology* **1995**, *83*, 31-44, doi:10.2307/2261148.
3. Cornelissen, J.H.C.; Lavorel, S.; Garnier, E.; Diaz, S.; Buchmann, N.; Gurvich, D.E.; Reich, P.B.; ter Steege, H.; Morgan, H.D.; van der Heijden, M.G.A.; et al. A handbook of protocols for standardised and easy measurement of plant functional traits worldwide. *Australian Journal of Botany* **2003**, *51*, 335-380, doi:10.1071/bt02124.
4. Falster, D.; Gallagher, R.; Wenk, E.H.; Wright, I.J.; Indarto, D.; Andrew, S.C.; Baxter, C.; Lawson, J.; Allen, S.; Fuchs, A.; et al. AusTraits, a curated plant trait database for the Australian flora. *Scientific Data* **2021**, *8*, doi:10.1038/s41597-021-01006-6.
5. Kasel, S.; Bennett, L.; Aponte, C.; Fedrigo, M.; Nitschke, C. Environmental heterogeneity promotes floristic turnover in temperate forests of south-eastern Australia more than dispersal limitation and disturbance. *Landscape Ecology* **2017**, *32*, 1613-1629, doi:10.1007/s10980-017-0526-7.
6. Kasel, S.; Nitschke, C.R.; Baker, S.C.; Pryde, E.C. Concurrent assessment of functional types in extant vegetation and soil seed banks informs environmental constraints and mechanisms of plant community turnover in temperate forests of south-eastern Australia. *For. Ecol. Manage.* **2022**, *519*, doi:10.1016/j.foreco.2022.120321.
